# Supplementary material for: Co-assembly-mediated biosupramolecular catalysis: thermodynamic insights into nucleobase specific (oligo)nucleotide attachment and cleavage
Source: Royal Society of Chemistry journal article supplement (doi:10.1039/d3tb01747h), 2023-01-01
Supplement: d3tb01747h1.pdf [file d3tb01747h1.pdf]

## Electronic Supplementary Information

### **Co-assembly Mediated Biosupramolecular Catalysis: Thermodynamic insights into Nucleobase-Specific (Oligo)nucleotide Attachment and Cleavage**

Priyanka,<sup>a</sup> Subhabrata Maiti\*<sup>a</sup>

<sup>a</sup> Department of Chemical Sciences, Indian Institute of Science Education and Research (IISER) Mohali, Knowledge City, Manauli 140306, India

\*Email: [smaiti@iisermohali.ac.in](mailto:smaiti@iisermohali.ac.in)

#### Table of Contents

|                                                                                            |            |
|--------------------------------------------------------------------------------------------|------------|
| <b>1. Materials and Methods.....</b>                                                       | <b>S2</b>  |
| <b>2. Synthesis and Characterization.....</b>                                              | <b>S3</b>  |
| <b>3. Catalytic Activity with PNPP and BPNPP.....</b>                                      | <b>S8</b>  |
| <b>4. Complex Formation Study with ALP.....</b>                                            | <b>S20</b> |
| <b>5. Microscopic Images.....</b>                                                          | <b>S22</b> |
| <b>6. Catalytic Activity with Nucleotides-HPLC Study.....</b>                              | <b>S26</b> |
| <b>7. Complex properties in the presence of nucleotides.....</b>                           | <b>S36</b> |
| <b>8. Catalytic Oligonucleotide Digestion study - HPLC Study.....</b>                      | <b>S40</b> |
| <b>9. Complex Properties in the presence of different oligonucleotides.....</b>            | <b>S48</b> |
| <b>10. Binding and Catalysis Studies through ITC (Isothermal Titration Calorimetry)...</b> | <b>S56</b> |
| <b>11. References.....</b>                                                                 | <b>S60</b> |

## 1. Materials and Methods:

All commercially available reagents were used as received without any further purification. The chemicals sodium phosphate dibasic ( $\text{Na}_2\text{HPO}_4$ ), hexadecyl bromide ( $\text{C}_{16}\text{H}_{33}\text{Br}$ ), 1-bromododecane ( $\text{C}_{12}\text{H}_{25}\text{Br}$ ), 1-bromooctane ( $\text{C}_8\text{H}_{15}\text{Br}$ ), 1-bromobutane ( $\text{C}_4\text{H}_9\text{Br}$ ), Dipotassium phosphate ( $\text{K}_2\text{HPO}_4$ ), Potassium dihydrogen phosphate ( $\text{KH}_2\text{PO}_4$ ), Fluorescein isothiocyanate (FITC), HEPES (4-(2-hydroxyethyl)-1-piperazineethanesulfonic acid), Bovine Serum Albumin (BSA), Cetyltrimethyl ammonium bromide (CTAB), Guanosine 5' monophosphate disodium salt (GMP), Thymidine 5' monophosphate disodium salt (TMP), Adenosine, Guanosine, Cytidine and Thymidine were procured from Sisco Research Laboratory (SRL), India. All oligonucleotide sequences, Adenosine 5' triphosphate disodium salt (ATP), adenosine 5' diphosphate disodium salt (ADP), Adenosine 5' monophosphate disodium salt (AMP), di-picolyl amine, coumarin 153, Bis(4-nitrophenyl) phosphate (BPNPP), para-nitrophenyl phosphate (PNPP) and alkaline phosphatase (ALP) of bovine origin were purchased from Sigma-Aldrich. Cytidine 5' monophosphate disodium salt (CMP) was purchased from TCI Chemicals India. The chemicals potassium carbonate ( $\text{K}_2\text{CO}_3$ ), potassium iodide (KI), Formic acid ( $\text{HCOOH}$ ) and para-nitrophenol (PNP) were also purchased from SRL India, and magnesium nitrate was obtained from Molychem. HPLC grade methanol and acetonitrile purchased from Sigma-Aldrich were used in synthesis and HPLC.

The Dynamic Light Scattering (DLS) data was recorded on Horiba Scientific Nanoparticle Analyzer SZ100V2.

Stock solutions of enzyme/dye were prepared both by weight and by UV-visible spectroscopy using molar extinction  $\epsilon_{280}$  (alkaline phosphatase from calf intestine) =  $106\,400\text{ M}^{-1}\text{cm}^{-1}$ ,  $\epsilon_{364}$  (Laurdan) =  $20\,000\text{ M}^{-1}\text{cm}^{-1}$  (in methanol),  $\epsilon_{430}(\text{C153})=20000\text{ M}^{-1}\text{cm}^{-1}$  (in ethanol),  $\epsilon_{310}(\text{PNPP})=9800\text{ M}^{-1}\text{cm}^{-1}$ ,  $\epsilon_{290}(\text{BPNPP})=18000\text{ M}^{-1}\text{cm}^{-1}$ ,  $\epsilon_{259}(\text{AM/D/TP})=15400\text{ M}^{-1}\text{cm}^{-1}$ ,  $\epsilon_{253}(\text{GMP})=13700\text{ M}^{-1}\text{cm}^{-1}$ ,  $\epsilon_{267}(\text{TMP})=10200\text{ M}^{-1}\text{cm}^{-1}$ ,  $\epsilon_{272}(\text{CMP})=9100\text{ M}^{-1}\text{cm}^{-1}$ . UV-vis studies were performed using a Varian Cary 60 (Agilent Technologies) spectrophotometer. Product Formation (PNP) was calculated using  $\epsilon_{400}(\text{PNP})=11000\text{ M}^{-1}\text{cm}^{-1}$ . The total reaction volume in the cuvette was fixed at 1 ml, and a cuvette with a path length of 1 cm was used for the entire kinetic study. All measurements were performed at 25 °C.

Fluorescence measurements were performed using Cary Eclipse Fluorescence Spectro-fluorometer.

Circular Dichroism (CD) Measurements were performed using Chirascan Spectrophotometer (Applied Photophysics) using a 1 mm path length quartz cell. The spectra were recorded over a scan range of 200-300 nm. The concentration of alkaline phosphatase used for the CD measurement was 2  $\mu\text{M}$ . All measurements were recorded in triplicate. The calculations of  $\alpha$ -helix and  $\beta$ -sheet content were performed using the BeStSel (beta structure selection) method.<sup>S1</sup>

Melting temperature measurements were performed using a Cary-Eclipse 3500 (Agilent Technologies).

The transmission electron microscopy images were taken using a JEOL JEM-F200 microscope.

Time-correlated single-photon counting (TCSPC) was measured in (Horiba Jobin Yvon, NJ). The samples were excited using 440-nm and 480-nm NanoLED picosecond laser diodes.

The surfactant  $\text{C}_{16}\text{DPA}\cdot\text{Zn}^{2+}$  was synthesized and characterized as reported in the literature.<sup>S2</sup>

## 2. Synthesis and Characterization

### Synthesis of C<sub>4</sub>DPA

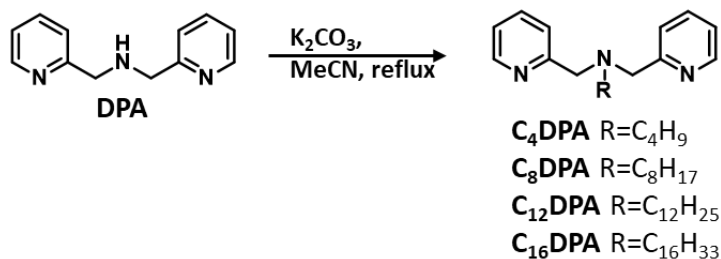

Di-(2-picolyl)amine (100 mg, 0.5 mmol) and 1-bromobutane (68.51mg, 0.5 mmol) were added to a suspension of K<sub>2</sub>CO<sub>3</sub> in MeCN (10 ml). The suspension was refluxed and stirred for 24 h, after which it was filtered. After evaporation under reduced pressure, the crude product was purified using column chromatography (silica gel, eluent: hexane/EtOAc) yielded the product as a faintly yellow sticky oil (31%).

<sup>1</sup>H NMR (δ ppm, CDCl<sub>3</sub>, 298 K, 400 MHz): 8.52-8.51 (m, 2H), 7.67-7.63 (td, *J* = 8, 8 Hz, 2H), 7.56-7.54 (m, 2H), 7.15-7.12 (m, 2H), 3.81 (s, 4H), 2.54 (m, 2H), 1.56-1.49 (m, 2H), 1.34-1.26 (m, 4H), 0.84 (t, *J* = 8 Hz, 3H).

<sup>13</sup>C NMR (δ ppm, CDCl<sub>3</sub>, 298 K, 100 MHz): 160.18, 148.90, 136.36, 122.80, 121.83, 60.48, 54.24, 29.70, 29.30, 20.50, 14.01.

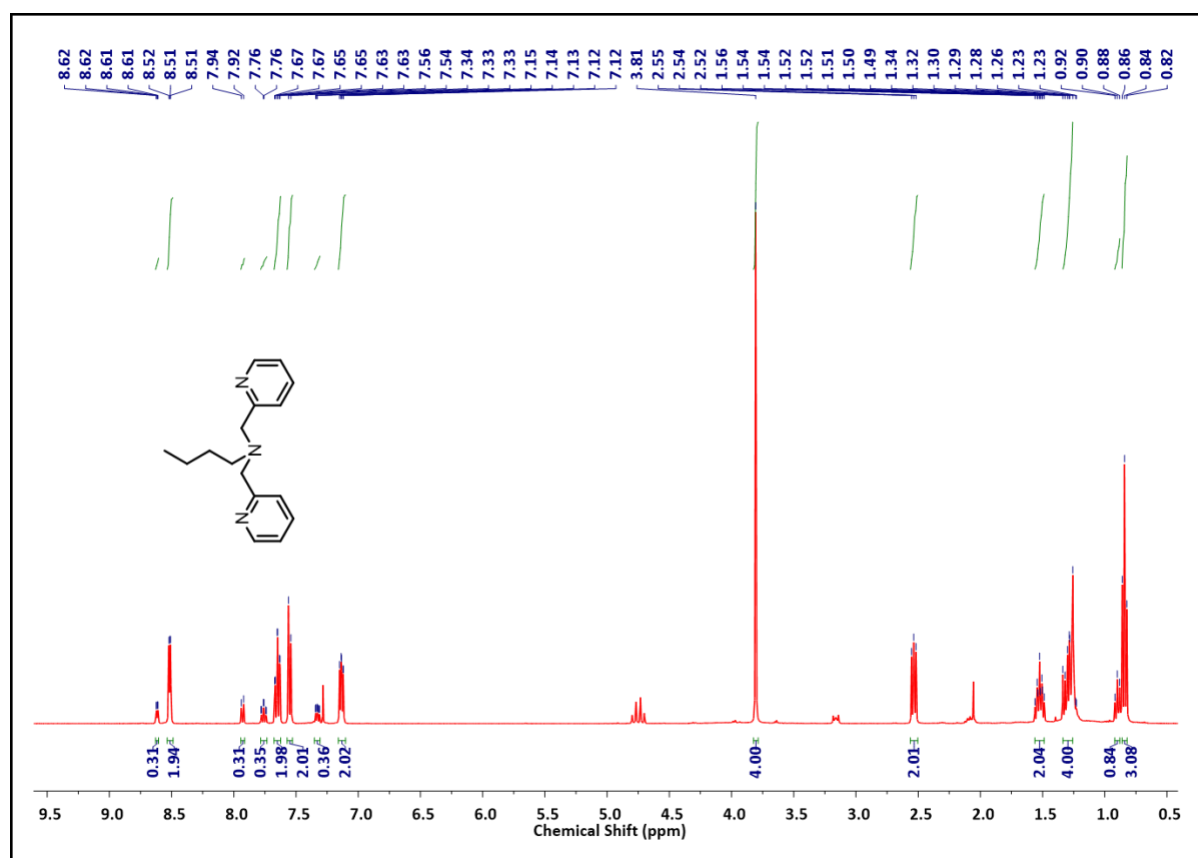

Fig. S1. <sup>1</sup>H-NMR Spectrum of Compound C<sub>4</sub>DPA in CDCl<sub>3</sub>.

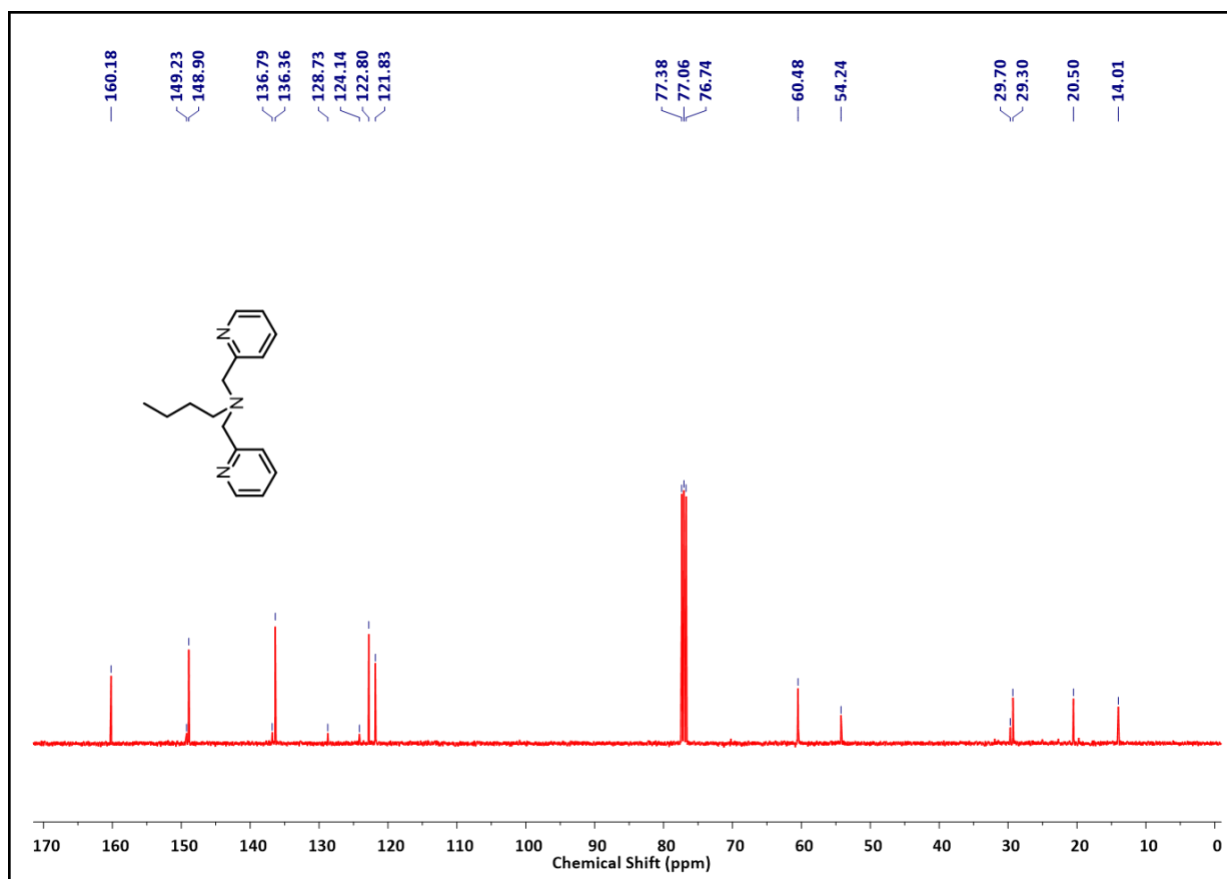

**Fig. S2.** <sup>13</sup>C-NMR Spectrum of Compound C<sub>4</sub>DPA in CDCl<sub>3</sub>.

### Synthesis of C<sub>8</sub>DPA

Di-(2-picolyl)amine (100 mg, 0.5 mmol) and 1-bromooctane (96.56mg, 0.5 mmol) were added to a suspension of K<sub>2</sub>CO<sub>3</sub> in MeCN (10 ml). The suspension was refluxed and stirred for 24 h, after which it was filtered. After evaporation under reduced pressure, the crude product was purified using column chromatography (silica gel, eluent: hexane/EtOAc) yielded the product as a faintly yellow sticky oil (58%).

<sup>1</sup>H NMR ( $\delta$  ppm, CDCl<sub>3</sub>, 298 K, 400 MHz): 8.54-8.53 (m, 2H), 7.67 (td, *J* = 4 Hz, 8 Hz, 2H), 7.57-7.55 (m, 2H), 7.17-7.14 (m, 2H), 3.82 (s, 4H), 2.54(m, 2H), 1.56-1.53 (m, 2H), 1.30-1.23 (m, 10H), 0.88 (t, *J* = 8 Hz, 3H).

<sup>13</sup>C NMR ( $\delta$  ppm, CDCl<sub>3</sub>, 298 K, 100 MHz): 160.10, 148.92, 136.36, 122.83, 121.85, 60.48, 54.72, 31.85, 29.44, 29.27, 27.32, 27.06, 22.66, 14.12.

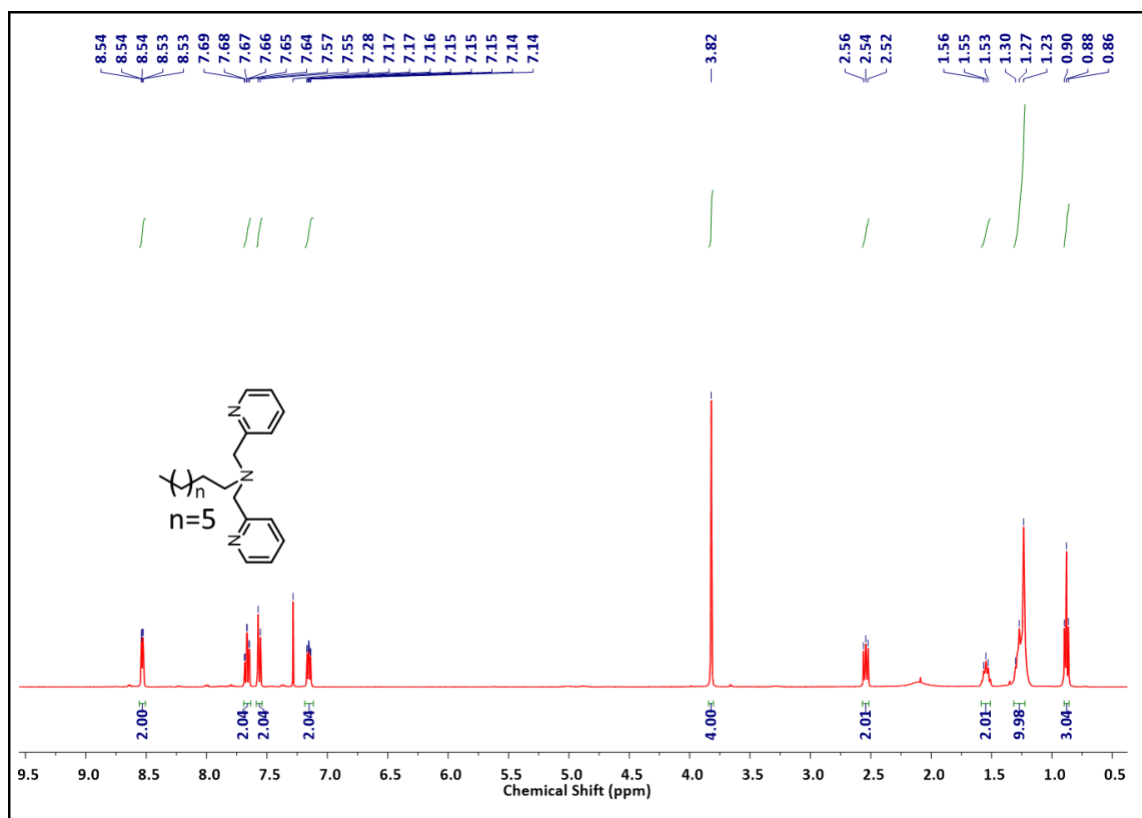

Fig. S3. <sup>1</sup>H-NMR Spectrum of Compound C<sub>8</sub>DPA in CDCl<sub>3</sub>.

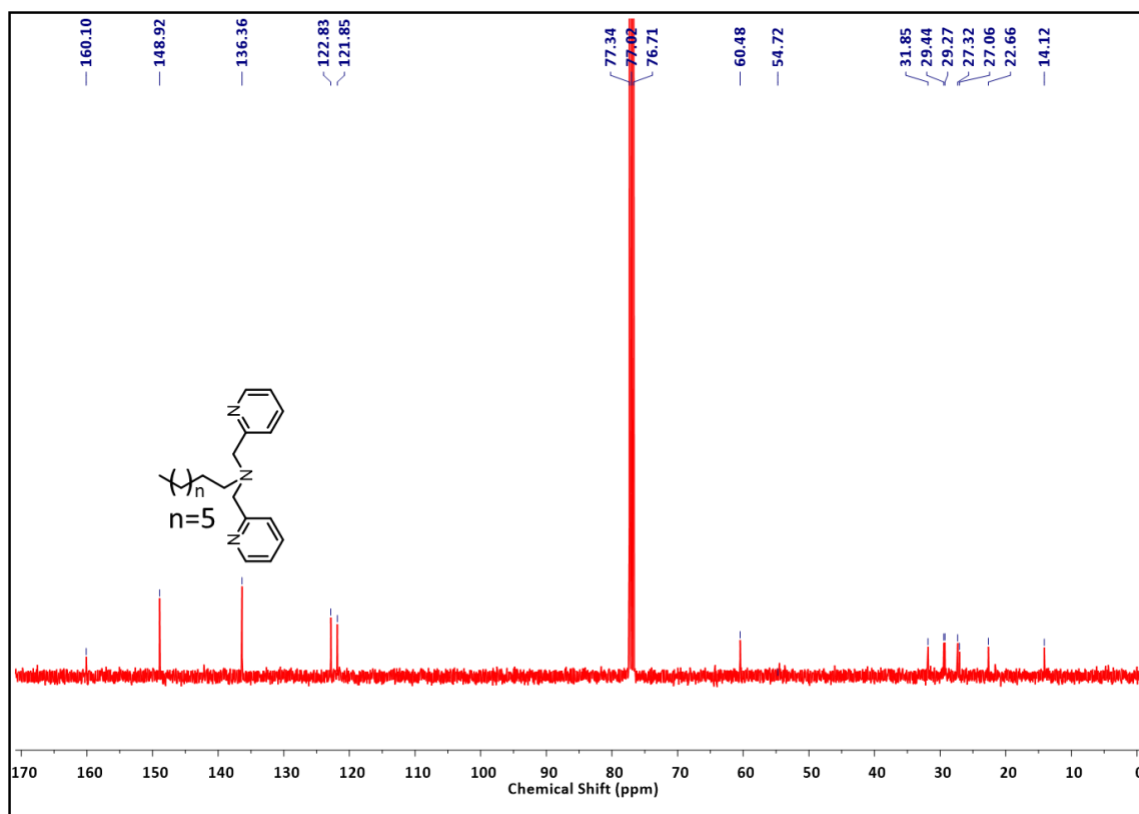

Fig. S4. <sup>13</sup>C-NMR Spectrum of Compound C<sub>8</sub>DPA in CDCl<sub>3</sub>.

## Synthesis of C<sub>12</sub>DPA

C<sub>12</sub>DPA was synthesized according to a literature protocol.<sup>2</sup> Di-(2-picoly)amine (100 mg, 0.5 mmol) and 1-bromododecane (150mg, 0.5 mmol) were added to a suspension of K<sub>2</sub>CO<sub>3</sub> in MeCN (10 ml). The suspension was refluxed and stirred for 24 h, after which it was filtered. After evaporation under reduced pressure, the crude product was purified using column chromatography (silica gel, eluent: hexane/EtOAc) yielded the product as a faintly yellow sticky oil (68%).

<sup>1</sup>H NMR ( $\delta$  ppm, CDCl<sub>3</sub>, 298 K, 400 MHz): 8.53 (m, 2H), 7.67 (td,  $J$  = 4 Hz, 8 Hz, 2H), 7.58-7.56 (m, 2H), 7.17-7.14 (m, 2H), 3.84 (s, 4H), 2.55 (m, 2H), 1.57-1.54 (m, 2H), 1.33-1.23 (m, 18H), 0.89 (t,  $J$  = 8Hz, 3H).

<sup>13</sup>C NMR ( $\delta$  ppm, CDCl<sub>3</sub>, 298 K, 100 MHz): 160.20, 148.91, 136.37, 122.81, 121.84, 60.50, 54.53, 31.93, 29.64, 29.50, 29.37, 27.33, 27.09, 22.71, 14.15.

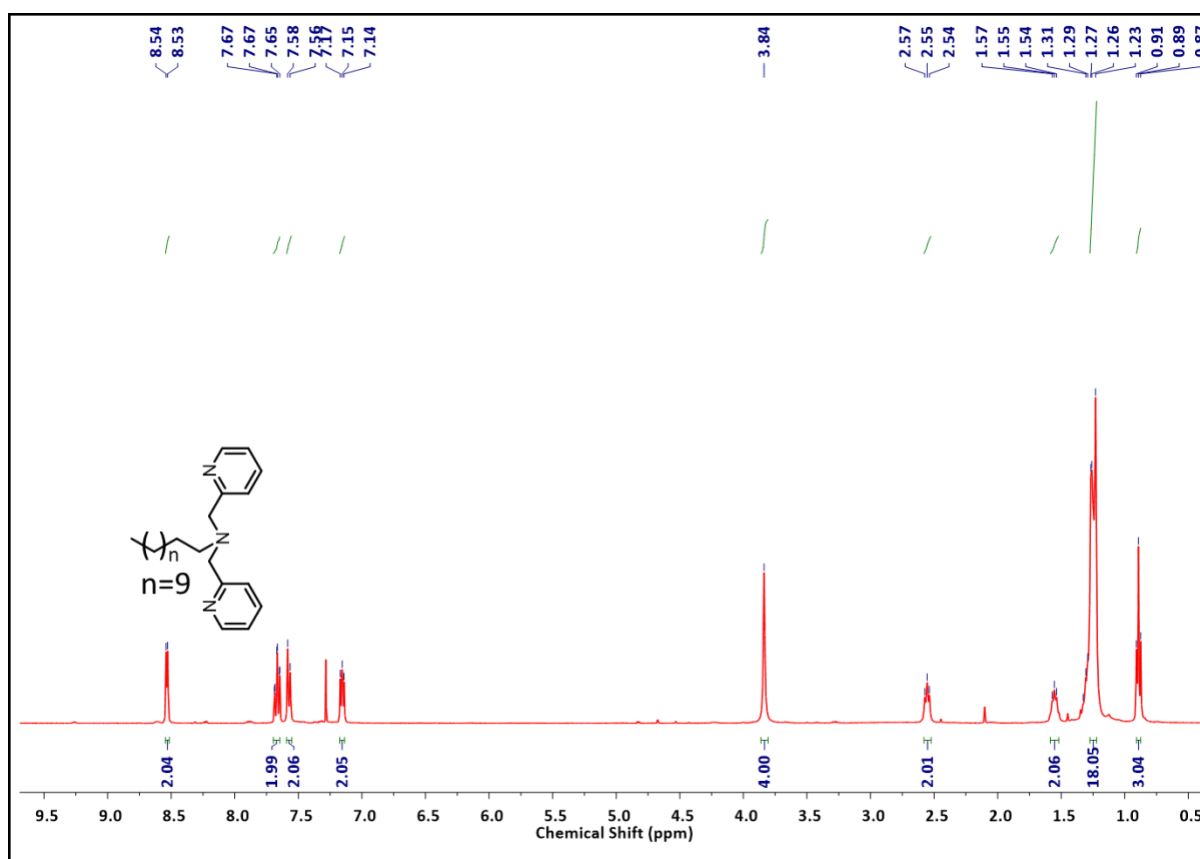

Fig. S5. <sup>1</sup>H-NMR Spectrum of Compound C<sub>12</sub>DPA in CDCl<sub>3</sub>.

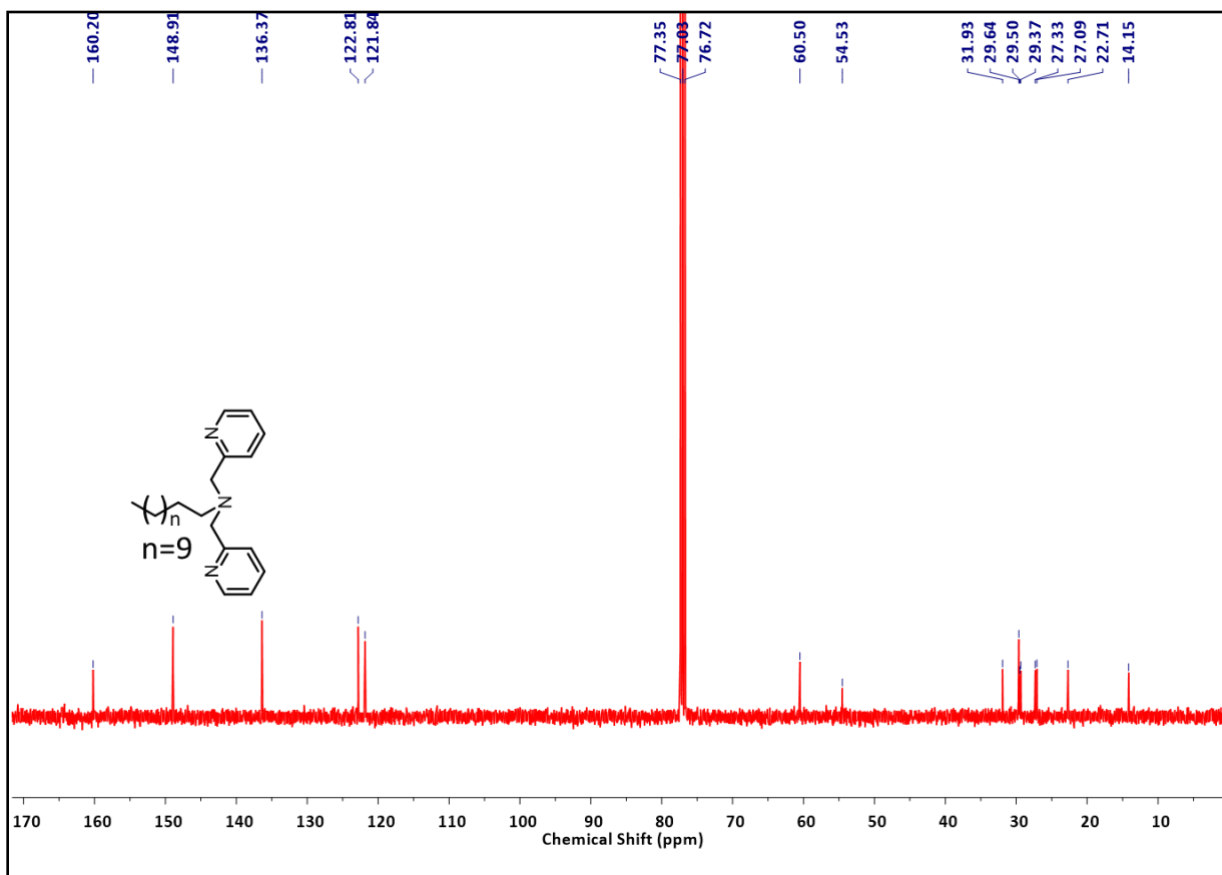

Fig. S6.  $^{13}\text{C}$ -NMR Spectrum of Compound  $\text{C}_{12}\text{DPA}$  in  $\text{CDCl}_3$ .

### Synthesis of $\text{C}_{16}\text{DPA}$

$\text{C}_{16}\text{DPA}$  was synthesized according to a literature protocol.<sup>S2</sup>

### Preparation of $\text{C}_4\text{DPA}\cdot\text{Zn}^{2+}$

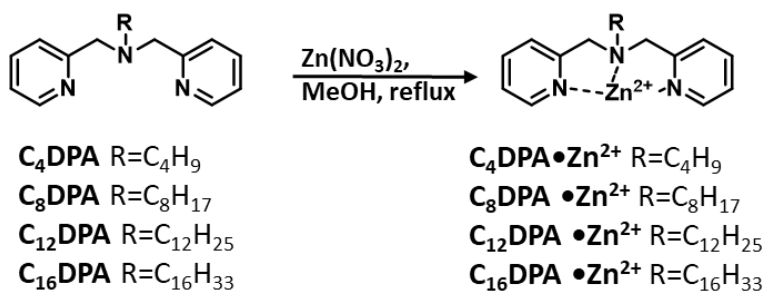

$\text{C}_4\text{DPA}$  (40 mg, 0.16 mmol) and  $\text{Zn(NO}_3)_2$  (47.6 mg, 0.16 mmol) were added to a round bottom flask and the reaction mixture was refluxed in MeOH for 3 h. The mixture was then evaporated to dryness under a vacuum in a rotatory evaporator yielding the product as a faint yellow solid, which was used for further observations without any purification.

### Preparation of $C_8DPA \cdot Zn^{2+}$

$C_8DPA$  (49.83 mg, 0.16 mmol) and  $Zn(NO_3)_2$  (47.6 mg, 0.16 mmol) were added to a round bottom flask and the reaction mixture was refluxed in MeOH for 3 h. The mixture was then evaporated to dryness under a vacuum in a rotatory evaporator yielding the product as a faint yellow solid, which was used for further observations without any purification.

### Preparation of $C_{12}DPA \cdot Zn^{2+}$

$C_{12}DPA$  (67.78 mg, 0.16 mmol) and  $Zn(NO_3)_2$  (47.6 mg, 0.16 mmol) were added to a round bottom flask and the reaction mixture was refluxed in MeOH for 3 h. The mixture was then evaporated to dryness under a vacuum in a rotatory evaporator yielding the product as a faint yellow solid, which was used for further observations without any purification.

### Preparation of the $C_{16}DPA \cdot Zn^{2+}$

$C_{16}DPA$  was synthesized according to a literature protocol.<sup>2</sup>

## 3. Catalytic activity with PNPP and BPNPP

### i. In Buffer

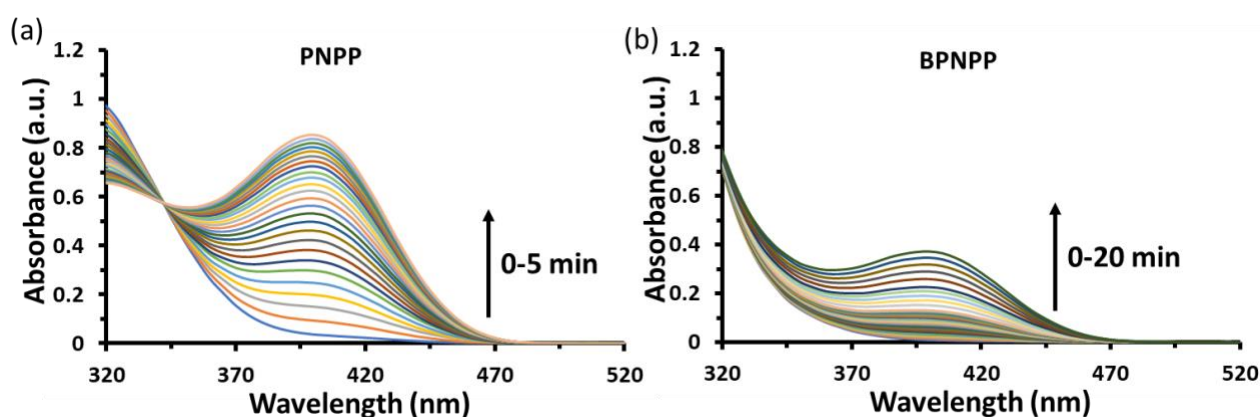

**Fig. S7.** Representative scanning kinetics images of (a) PNPP (b) BPNPP catalysis over time in presence of ALP. Experimental conditions: [PNPP] = 100  $\mu$ M, [BPNPP] = 100  $\mu$ M, [ALP] = 100 nM, [HEPES] = 5 mM, pH 7.0, T = 25  $^{\circ}$ C.



ii. With  $C_4DPA \bullet Zn^{2+}$

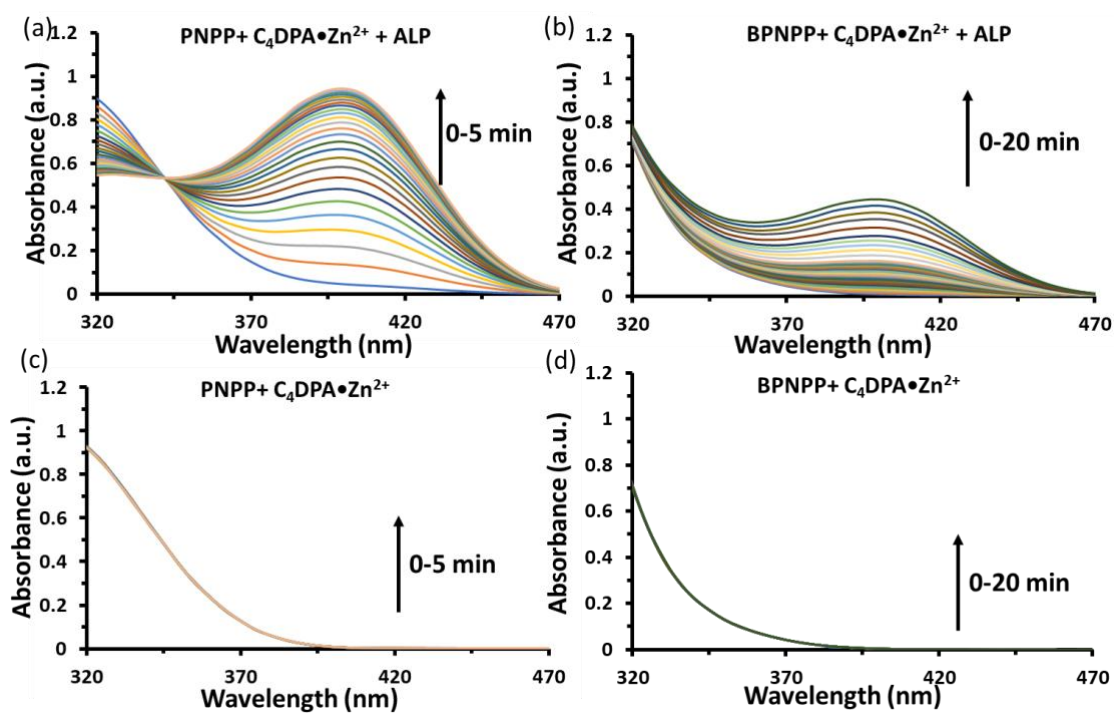

**Fig. S8.** Representative scanning kinetic images of catalysis of (a) PNPP (b) BPNPP with  $C_4DPA \bullet Zn^{2+}$  + ALP conjugate and (c) PNPP (d) BPNPP with  $C_4DPA \bullet Zn^{2+}$  over time. Experimental conditions: [PNPP] = 100  $\mu$ M, [BPNPP] = 100  $\mu$ M, [ALP] = 100 nM, [ $C_4DPA \bullet Zn^{2+}$ ] = 50  $\mu$ M, [HEPES] = 5 mM, pH 7.0, T = 25  $^{\circ}$ C.

iii. With  $C_8DPA \bullet Zn^{2+}$

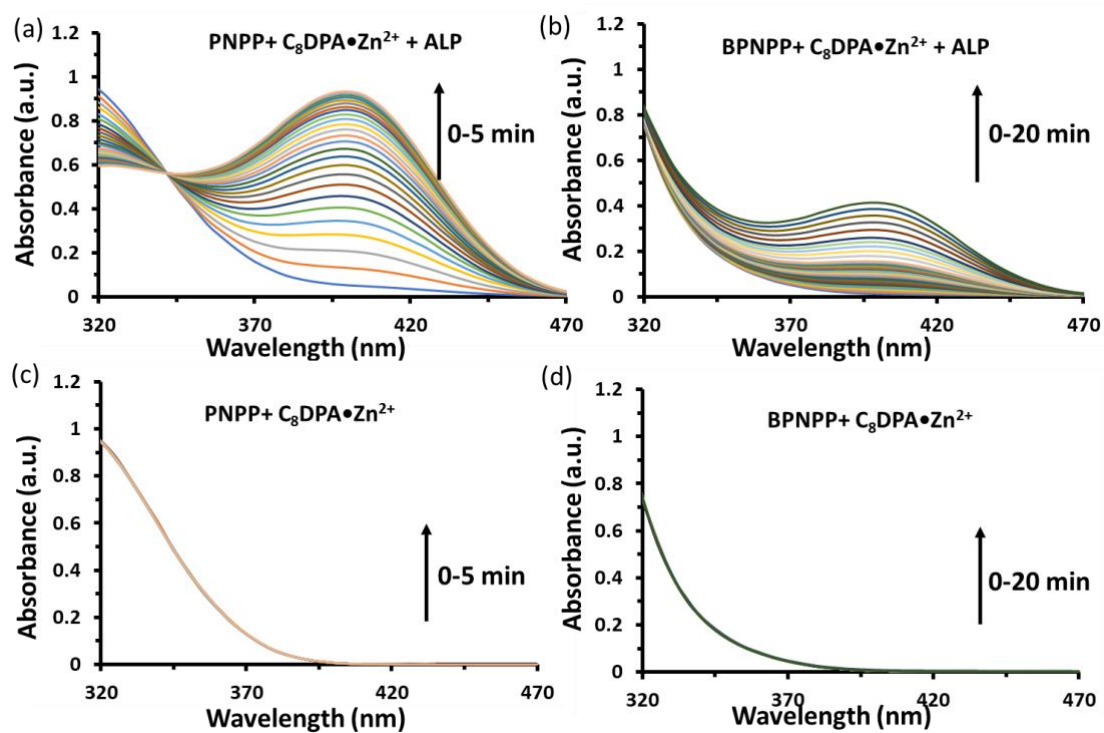

**Fig. S9.** Representative scanning kinetic images of catalysis of (a) PNPP (b) BPNPP with  $C_8DPA \bullet Zn^{2+}$  + ALP conjugate and (c) PNPP (d) BPNPP with  $C_8DPA \bullet Zn^{2+}$  over time. Experimental conditions: [PNPP] = 100  $\mu$ M, [BPNPP] = 100  $\mu$ M, [ALP] = 100 nM, [ $C_8DPA \bullet Zn^{2+}$ ] = 50  $\mu$ M, [HEPES] = 5 mM, pH 7.0, T = 25  $^{\circ}$ C.

iv. With  $C_{12}DPA \bullet Zn^{2+}$

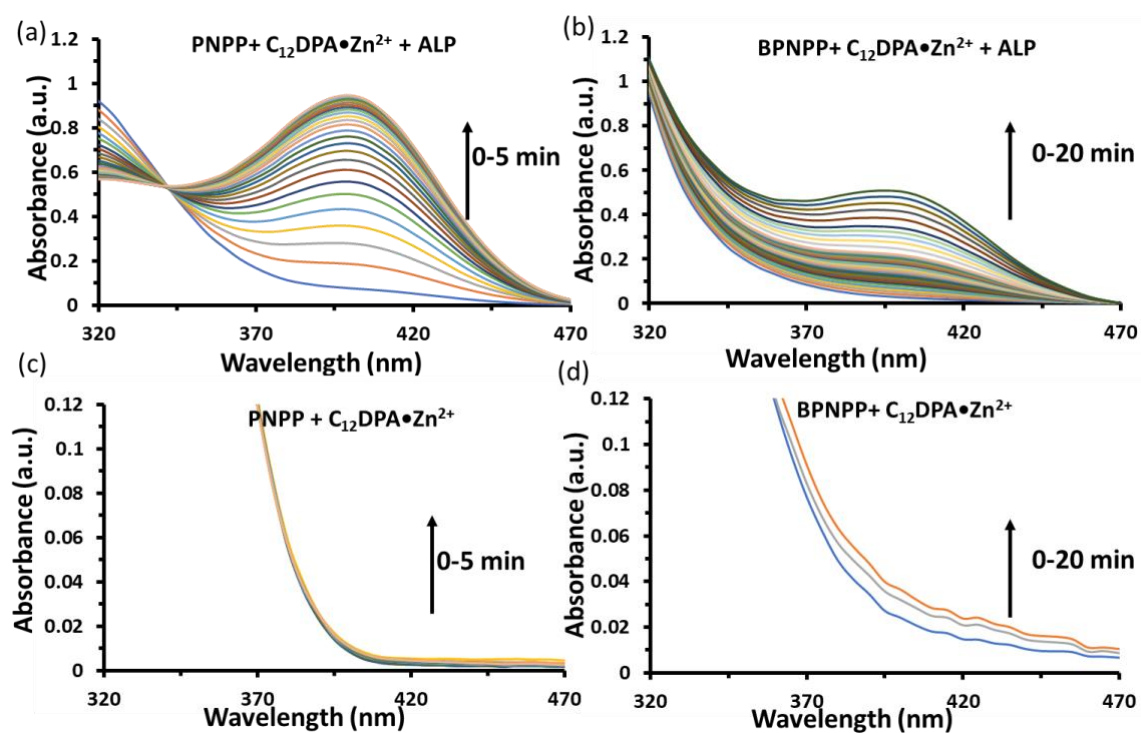

**Fig. S10.** Representative scanning kinetic images of catalysis of (a) PNPP (b) BPNPP with  $C_{12}DPA \bullet Zn^{2+}$  + ALP conjugate and (c) PNPP (d) BPNPP with  $C_{12}DPA \bullet Zn^{2+}$  over time. Experimental conditions: [PNPP] = 100  $\mu$ M, [BPNPP] = 100  $\mu$ M, [ALP] = 100 nM, [ $C_{12}DPA \bullet Zn^{2+}$ ] = 50  $\mu$ M, [HEPES] = 5 mM, pH 7.0, T = 25  $^{\circ}$ C.

v. With  $C_{16}DPA \cdot Zn^{2+}$

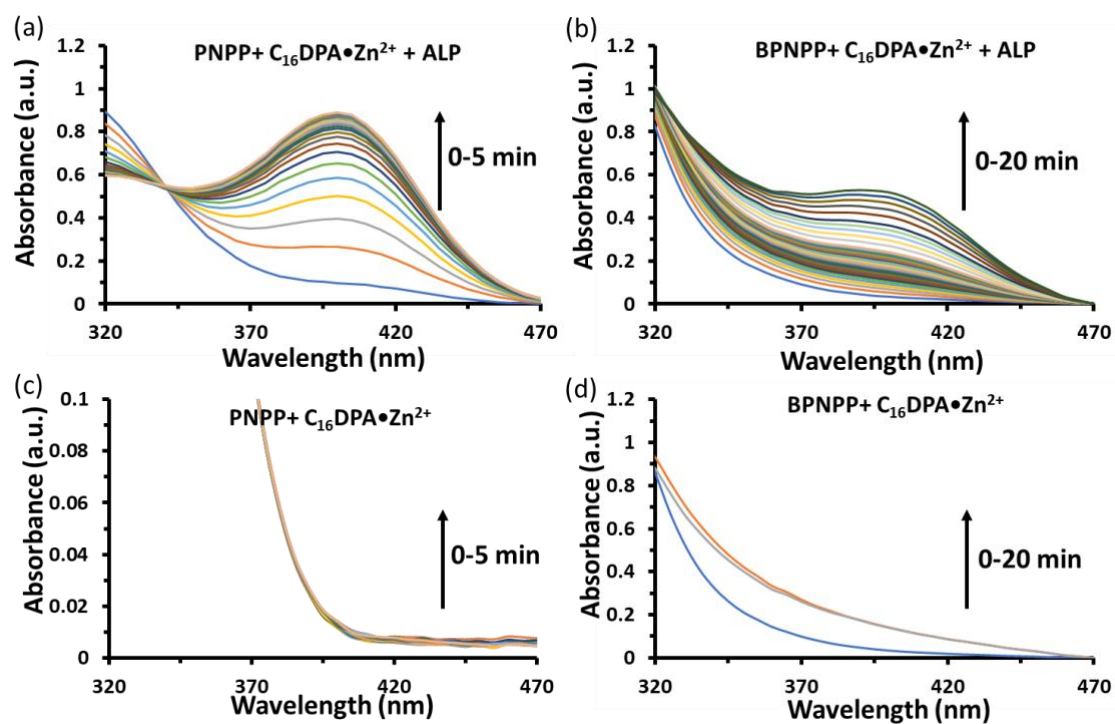

**Fig. S11.** Representative scanning kinetics images of catalysis of (a) PNPP (b) BPNPP with  $C_{12}DPA \cdot Zn^{2+}$  + ALP conjugate and (c) PNPP (d) BPNPP with  $C_{12}DPA \cdot Zn^{2+}$  over time. Experimental conditions: [PNPP] = 100  $\mu$ M, [BNPP] = 100  $\mu$ M, [ALP] = 100 nM, [ $C_{12}DPA \cdot Zn^{2+}$ ] = 50  $\mu$ M, [HEPES] = 5 mM, pH 7.0, T = 25  $^{\circ}$ C.

vi. With CTAB

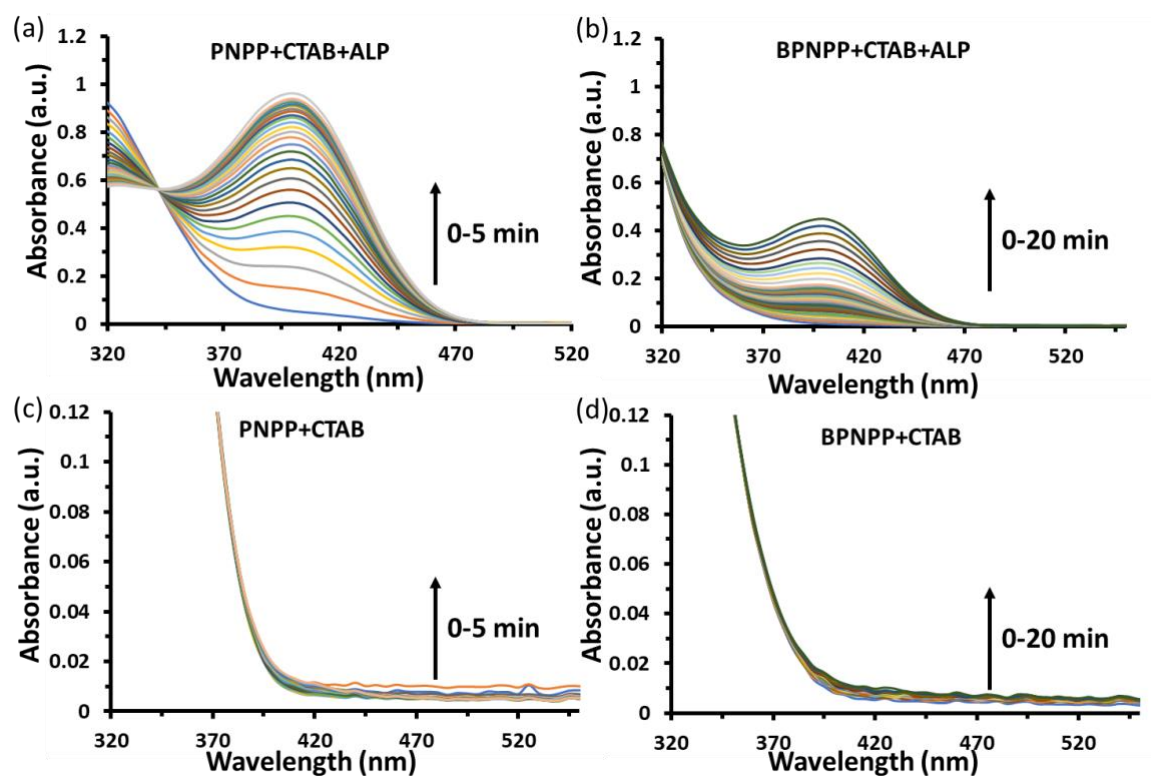

**Fig. S12.** Representative scanning kinetics images of catalysis of (a) PNPP (b) BPNPP with CTAB + ALP conjugate and (c) PNPP (d) BPNPP with CTAB over time. Experimental conditions: [PNPP] = 100  $\mu$ M, [BPNPP] = 100  $\mu$ M, [ALP] = 100 nM, [CTAB] = 50  $\mu$ M, [HEPES] = 5 mM, pH 7.0, T = 25  $^{\circ}$ C.

vii. Catalytic activity of PNPP and BPNPP with Negatively Charged Protein BSA (Bovine Serum Albumin)

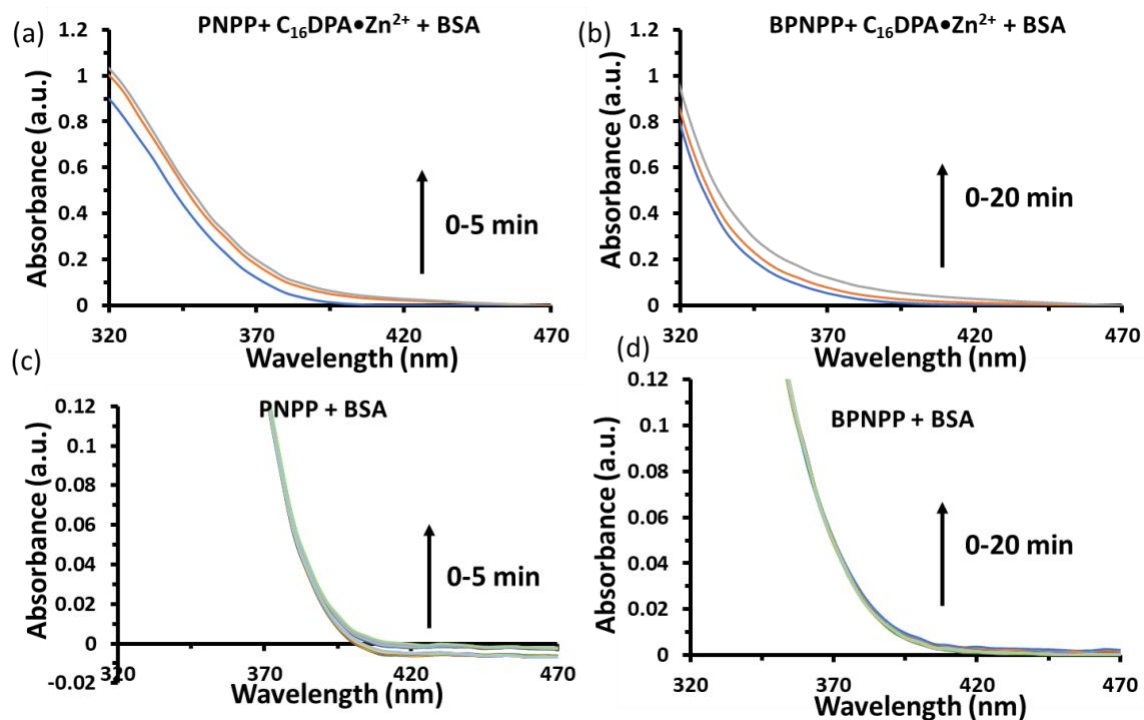

**Fig. S13.** Representative scanning kinetics images of catalysis of (a) PNPP (b) BPNPP with C<sub>16</sub>DPA•Zn<sup>2+</sup>+ ALB conjugate and (c) PNPP (d) BPNPP with BSA over time. Experimental conditions: [PNPP] = 100  $\mu$ M, [BPNPP] = 100  $\mu$ M, [BSA] = 1  $\mu$ M, [C<sub>16</sub>DPA•Zn<sup>2+</sup>] = 50  $\mu$ M, [HEPES] = 5 mM, pH 7.0, T = 25  $^{\circ}$ C.

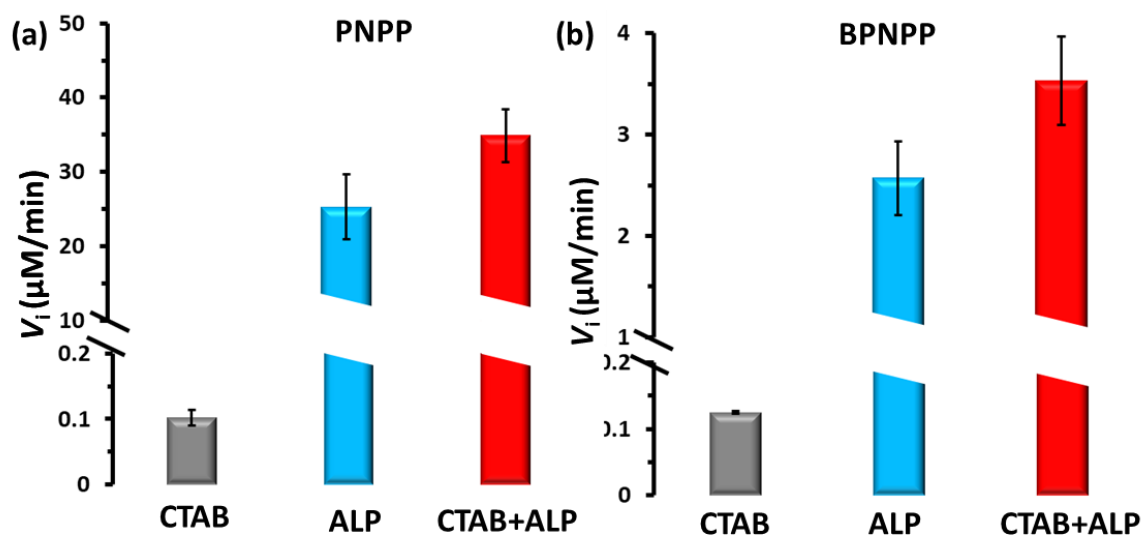

**Fig. S14.** Representative bar plot to show  $V_i$  of (a) PNPP and (b) BPNPP catalysis in the presence and absence of ALP with CTAB. Experimental conditions: [PNPP] = 100  $\mu\text{M}$ , [BPNPP] = 100  $\mu\text{M}$ , [ALP] = 100 nM, [CTAB] = 50  $\mu\text{M}$ , [HEPES] = 5 mM, pH 7.0, T = 25  $^\circ\text{C}$ .

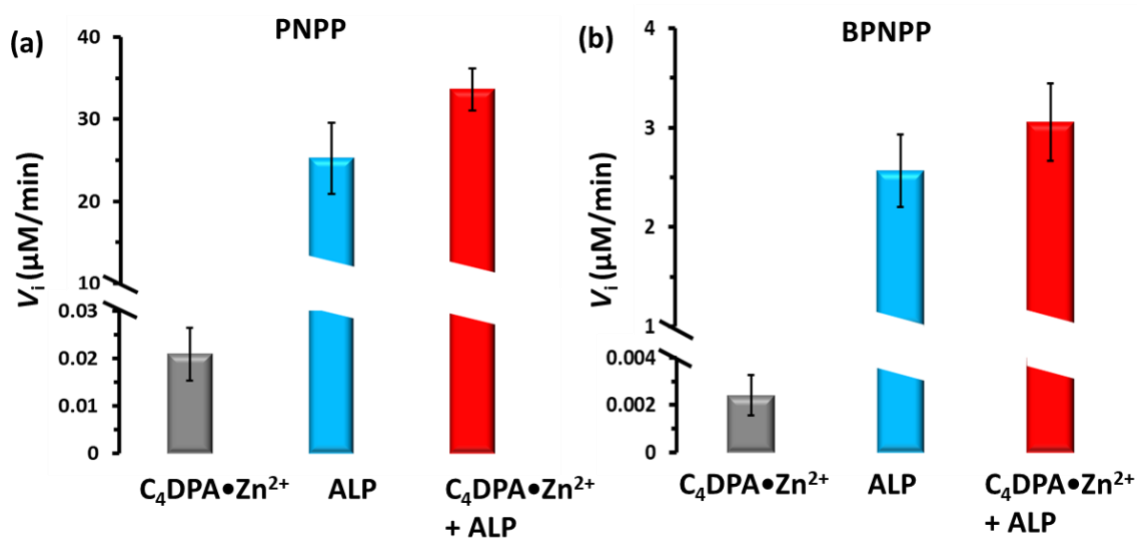

**Fig. S15.** Representative bar plot to show  $V_i$  of (a) PNPP and (b) BPNPP catalysis in the presence and absence of ALP with metallosurfactant. Experimental conditions: [PNPP] = 100  $\mu\text{M}$ , [BPNPP] = 100  $\mu\text{M}$ , [ALP] = 100 nM, [ $\text{C}_4\text{DPA}\cdot\text{Zn}^{2+}$ ] = 50  $\mu\text{M}$ , [HEPES] = 5 mM, pH 7.0, T = 25  $^\circ\text{C}$ .

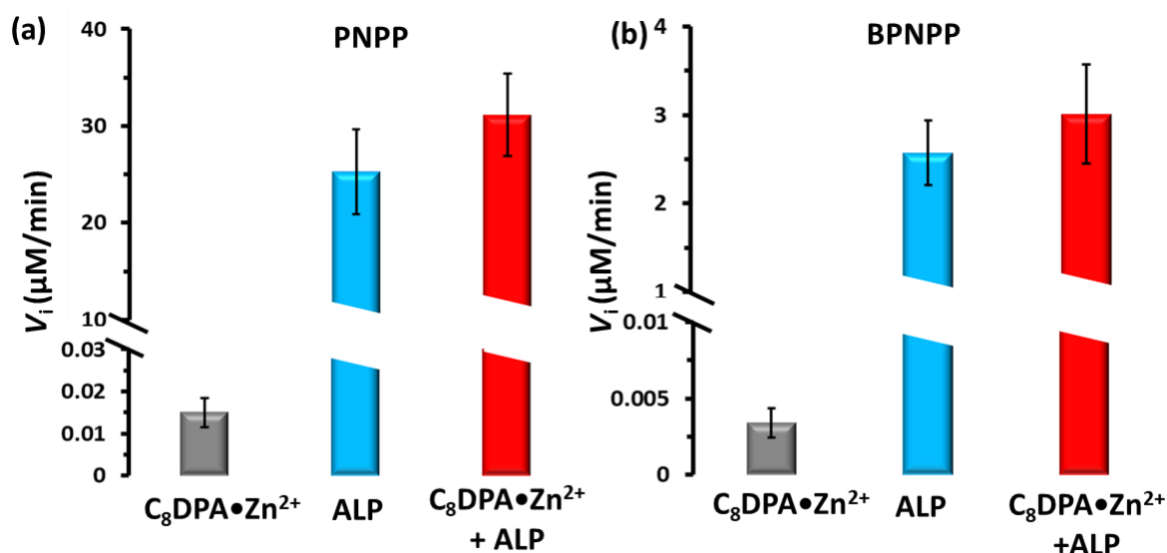

**Fig. S16.** Representative bar plot to show  $V_i$  of (a) PNPP and (b) BPNPP catalysis in the presence and absence of ALP with metallosurfactant. Experimental conditions: [PNPP] = 100  $\mu\text{M}$ , [BPNPP] = 100  $\mu\text{M}$ , [ALP] = 100 nM, [ $\text{C}_8\text{DPA}\cdot\text{Zn}^{2+}$ ] = 50  $\mu\text{M}$ , [HEPES] = 5 mM, pH 7.0, T = 25  $^\circ\text{C}$ .

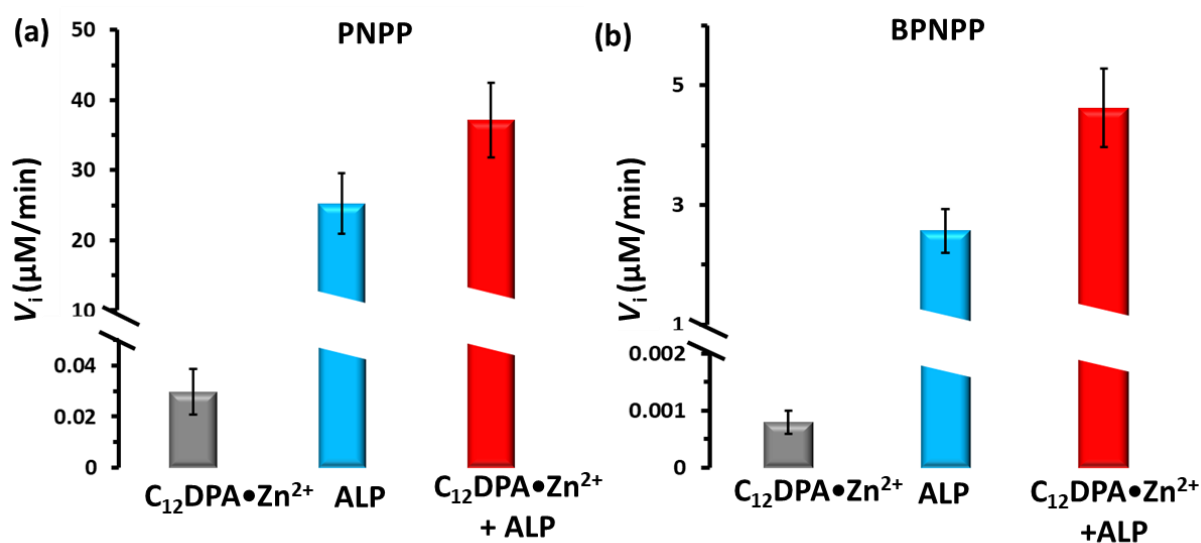

**Fig. S17.** Representative bar plot to show  $V_i$  of (a) PNPP and (b) BPNPP catalysis in the presence and absence of ALP with metallosurfactant. Experimental conditions: [PNPP] = 100  $\mu\text{M}$ , [BPNPP] = 100  $\mu\text{M}$ , [ALP] = 100 nM, [ $\text{C}_{12}\text{DPA}\cdot\text{Zn}^{2+}$ ] = 50  $\mu\text{M}$ , [HEPES] = 5 mM, pH 7.0, T = 25  $^\circ\text{C}$ .



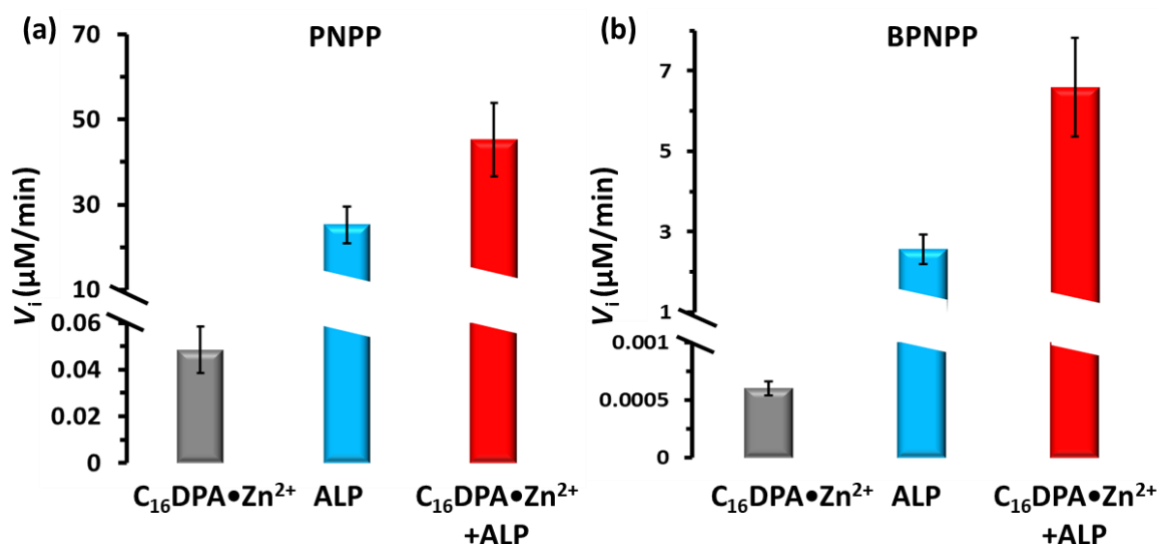

**Fig. S18.** Representative bar plot to show  $V_i$  of (a) PNPP and (b) BPNPP catalysis in the presence and absence of ALP with metallosurfactant. Experimental conditions: [PNPP] = 100  $\mu\text{M}$ , [BPNPP] = 100  $\mu\text{M}$ , [ALP] = 100 nM, [ $\text{C}_{16}\text{DPA}\cdot\text{Zn}^{2+}$ ] = 50  $\mu\text{M}$ , [HEPES] = 5 mM, pH 7.0, T = 25  $^\circ\text{C}$ .

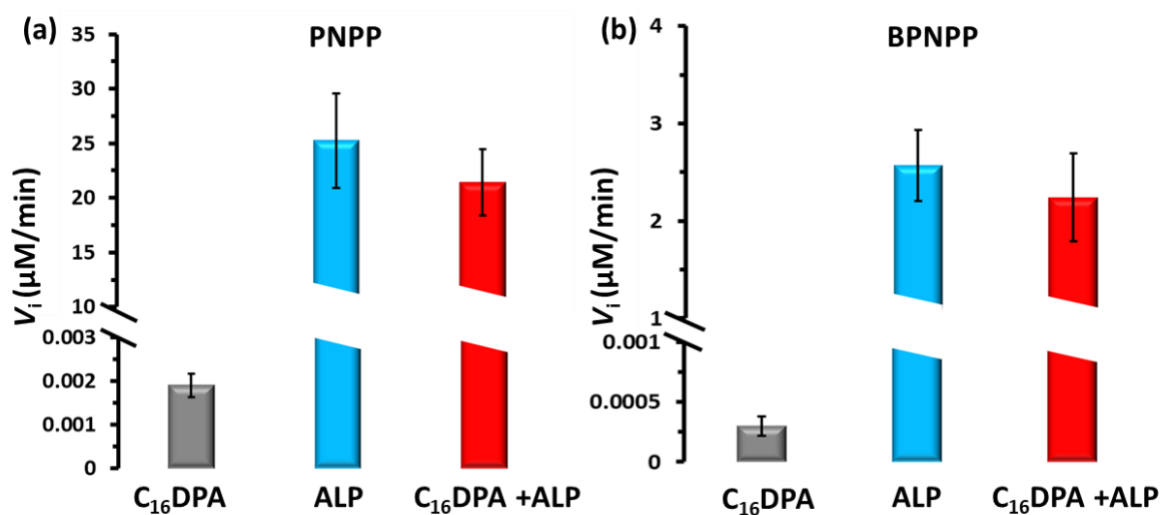

**Fig. S19.** Representative bar plot to show  $V_i$  of (a) PNPP and (b) BPNPP catalysis in the presence and absence of ALP with  $\text{C}_{16}\text{DPA}$ . Experimental conditions: [PNPP] = 100  $\mu\text{M}$ , [BPNPP] = 100  $\mu\text{M}$ , [ALP] = 100 nM, [ $\text{C}_{16}\text{DPA}$ ] = 50  $\mu\text{M}$ , [HEPES] = 5 mM, pH 7.0, T = 25  $^\circ\text{C}$ .

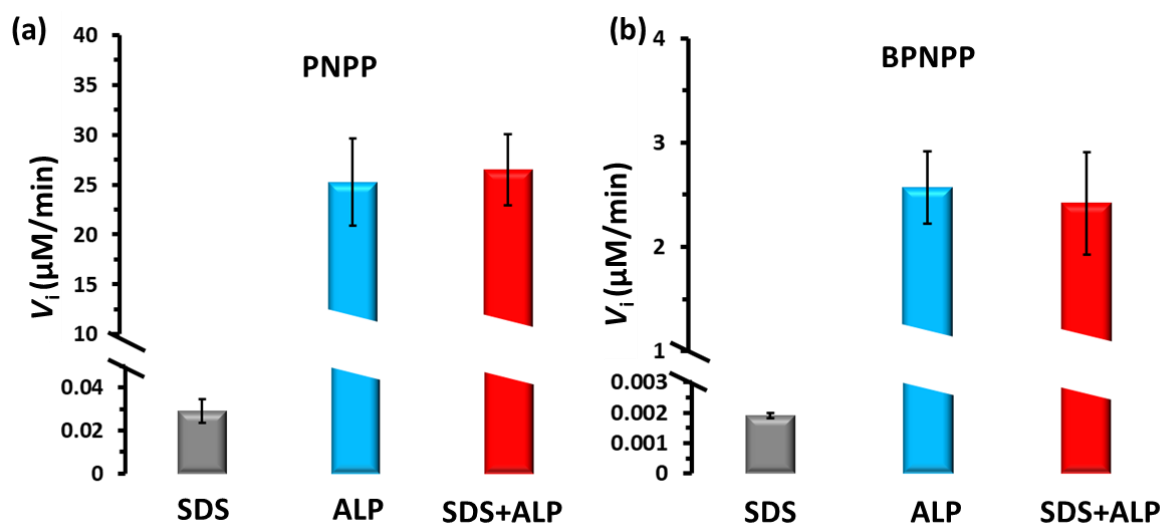

**Fig. S20.** Representative bar plot to show  $V_i$  of (a) PNPP and (b) BPNPP catalysis in the presence and absence of ALP with SDS. Experimental conditions: [PNPP] = 100  $\mu\text{M}$ , [BPNPP] = 100  $\mu\text{M}$ , [ALP] = 100 nM, [SDS] = 50  $\mu\text{M}$ , [HEPES] = 5 mM, pH 7.0, T = 25  $^{\circ}\text{C}$ .

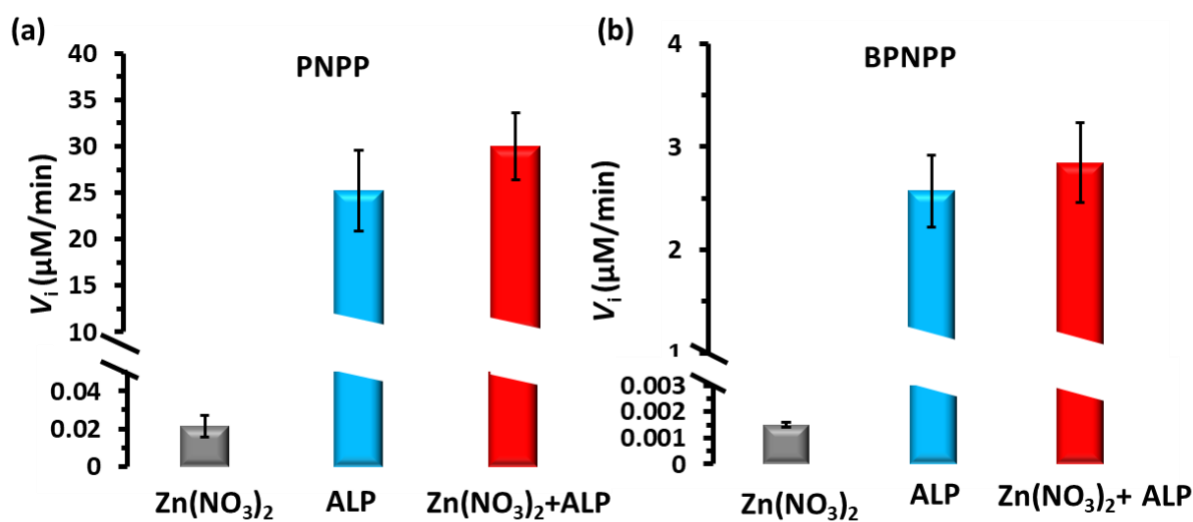

**Fig. S21.** Representative bar plot to show  $V_i$  of (a) PNPP and (b) BPNPP catalysis in the presence and absence of ALP with  $\text{Zn}(\text{NO}_3)_2$ . Experimental conditions: [PNPP] = 100  $\mu\text{M}$ , [BPNPP] = 100  $\mu\text{M}$ , [ALP] = 100 nM, [ $\text{Zn}(\text{NO}_3)_2$ ] = 50  $\mu\text{M}$ , [HEPES] = 5 mM, pH 7.0, T = 25  $^{\circ}\text{C}$ .

viii. With different Concentration of metallosurfactant

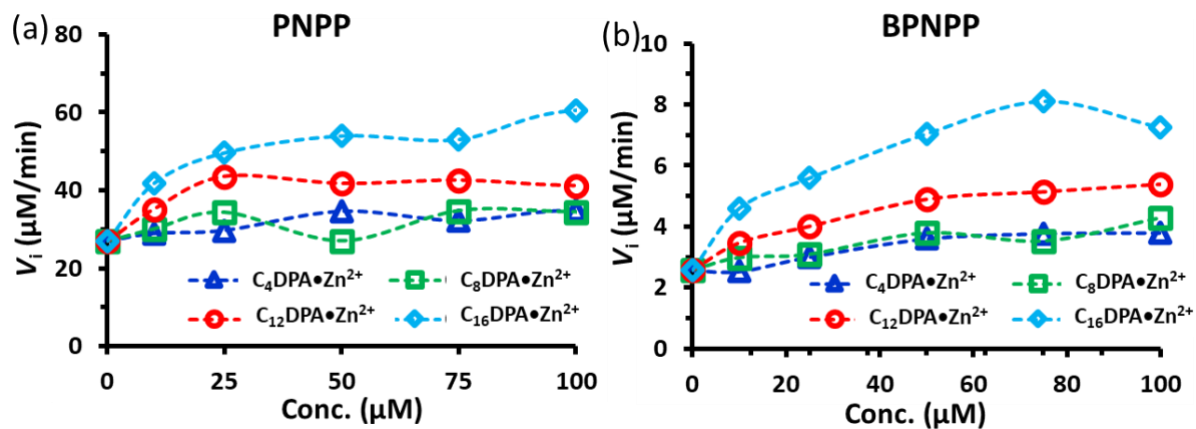

**Fig. S22.** Representative plot to show  $V_i$  of (a) PNPP (b) BPNPP catalysis in presence of ALP and different conc. of metallosurfactant. Experimental conditions: [PNPP] = 100  $\mu\text{M}$ , [BPNPP] = 100  $\mu\text{M}$ , [ALP] = 100 nM, [HEPES] = 5 mM, pH 7.0, T = 25  $^\circ\text{C}$ .

#### 4. Complex Formation Study With ALP

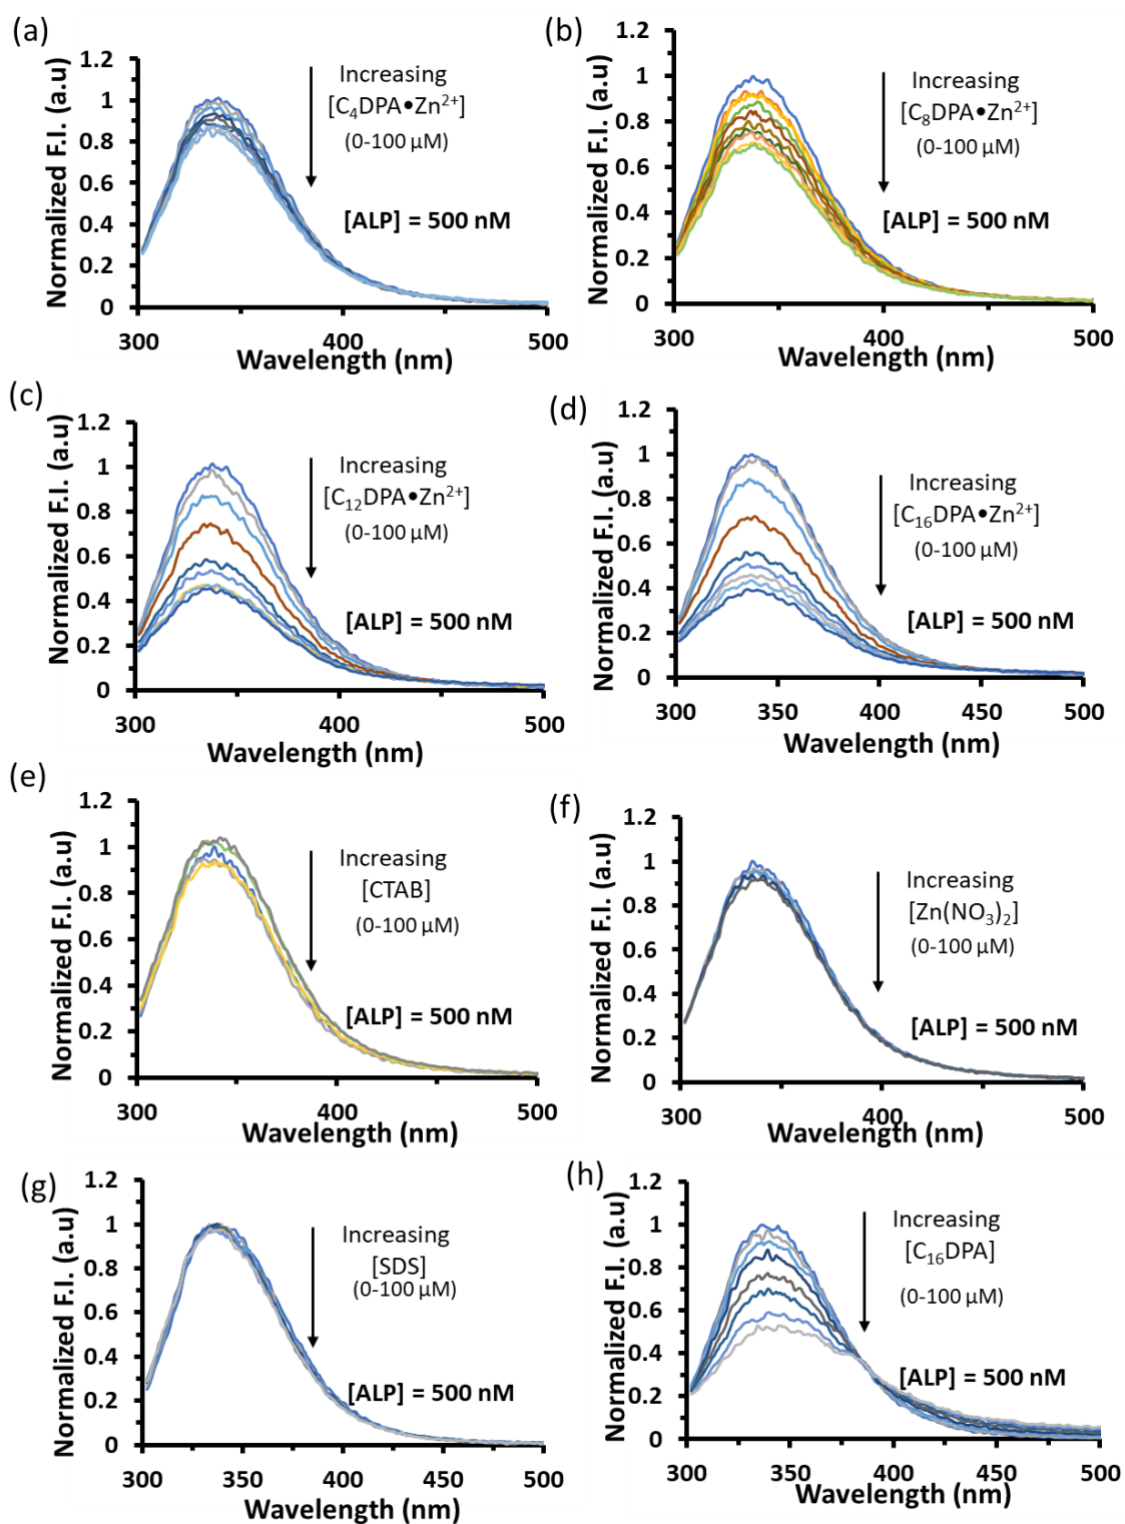

**Fig. S23.** Fluorescence emission spectra of ALP (500 nM) in the presence of (a)  $C_4DPA \cdot Zn^{2+}$  (b)  $C_8DPA \cdot Zn^{2+}$  (c)  $C_{12}DPA \cdot Zn^{2+}$  (d)  $C_{16}DPA \cdot Zn^{2+}$  (e) CTAB and (f)  $Zn(NO_3)_2$  (g) SDS (h)  $C_{16}DPA$  with the following concentrations: 0  $\mu M$ , 1  $\mu M$ , 5  $\mu M$ , 10  $\mu M$ , 20  $\mu M$ , 35  $\mu M$ , 50  $\mu M$ , 75  $\mu M$  and 100  $\mu M$ . Experimental conditions: Slit Width ex/em = 5/5 nm, Excitation wavelength= 280nm, [HEPES] = 5 mM, pH 7.0, T = 25  $^{\circ}C$ .

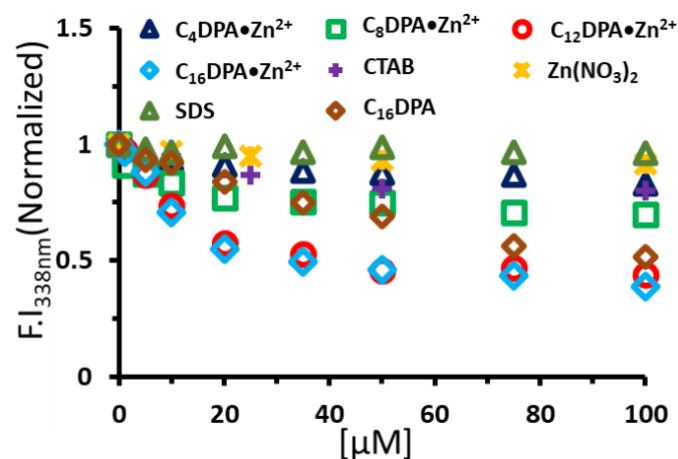

**Fig. S24.** Decrease in tryptophan fluorescence of native ALP in presence of metallosurfactant, CTAB, C<sub>16</sub>DPA and Zn(NO<sub>3</sub>)<sub>2</sub>. Experimental conditions: Slit Width ex/em = 5/5 nm, Excitation wavelength= 280nm, [HEPES] = 5 mM, pH 7.0, T = 25 °C.

All the above-mentioned data mentioned in Fig. S7 to Fig. S17 suggest necessity of Zn<sup>2+</sup> in the surfactant group for efficient binding of enzyme and substrate for enhanced catalytic phosphoester cleavage.

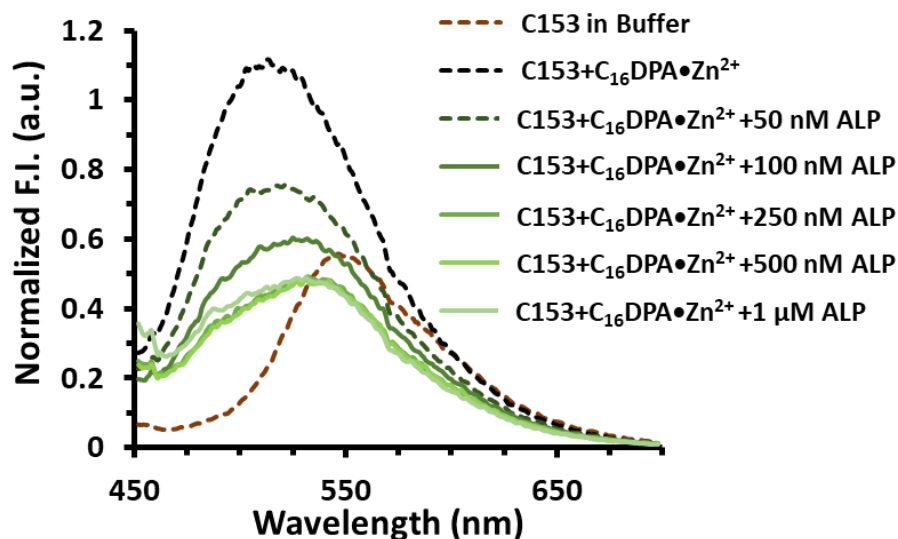

**Fig. S25.** Fluorescence emission spectra ALP in the presence of C<sub>16</sub>DPA•Zn<sup>2+</sup> using C153 as a hydrophobic probe. The blue shift of peaks in the presence of surfactant verifies the hydrophobic residence propensity of C153. Experimental conditions: [C<sub>16</sub>DPA•Zn<sup>2+</sup>] = 50 μM, [C153] = 1 μM, Slit Width ex/em = 5/5 nm, Excitation wavelength= 430nm, [HEPES] = 5 mM, pH 7.0, T = 25 °C.

## 5. Microscopic Images

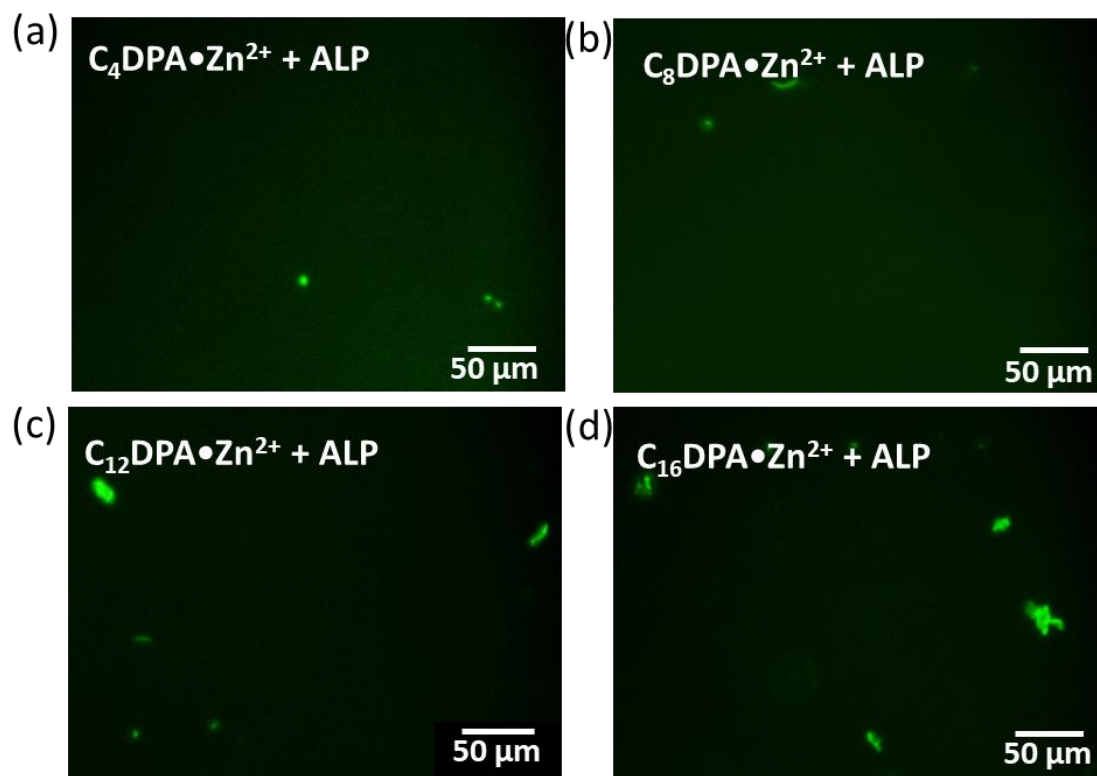

**Fig. S26.** Fluorescence microscopic images of conjugates of ALP with (a)  $C_4DPA \bullet Zn^{2+}$  (b)  $C_8DPA \bullet Zn^{2+}$  (c)  $C_{12}DPA \bullet Zn^{2+}$  (d)  $C_{16}DPA \bullet Zn^{2+}$  metallosurfactant. Images were captured after incubating the samples for 15 minutes. Experimental conditions:  $[ALP] = 1 \mu M$ ,  $[C153] = 1 \mu M$ ,  $[metallosurfactant] = 50 \mu M$ ,  $[HEPES] = 5 \text{ mM}$ ,  $pH 7.0$ ,  $T = 25 \text{ }^\circ C$ .

## TEM Images

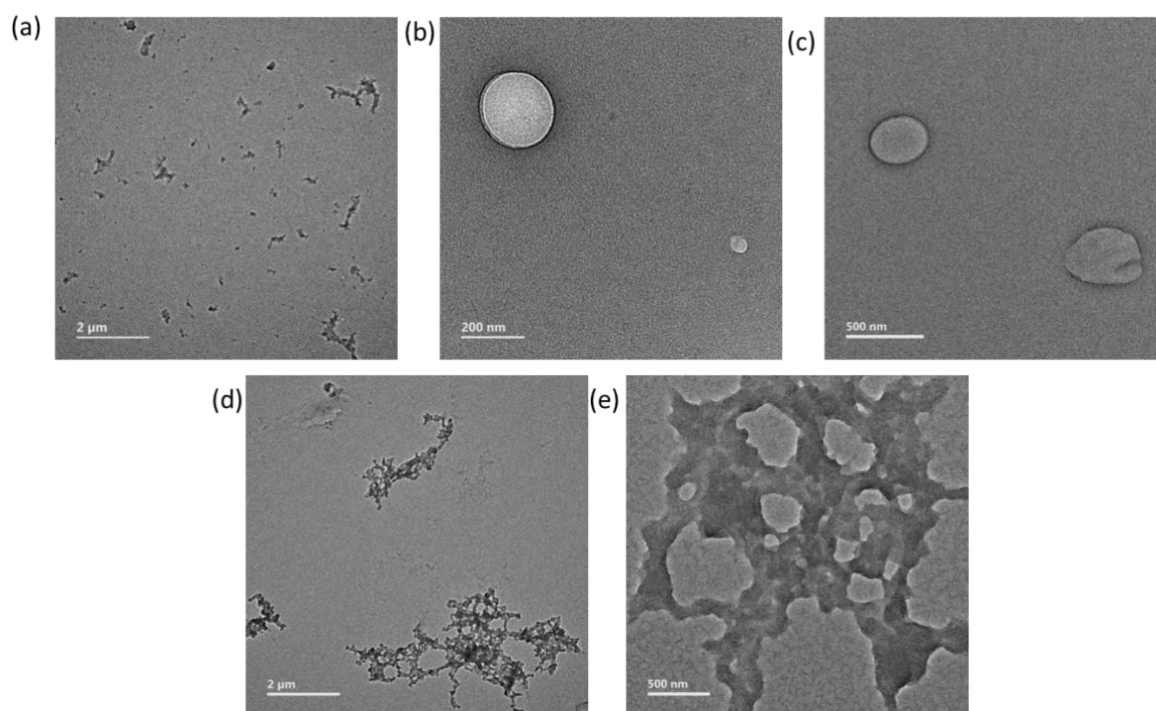

**Fig. S27.** TEM images of conjugates of  $C_{16}DPA \cdot Zn^{2+}$  with (a) ALP (b) PNPP (c) BPNPP (d) PNPP+ALP (e) BPNPP+ALP. Images were captured after incubating the samples for 15 minutes. 0.1% uranyl acetate solution was used to stain the grid. Experimental conditions:  $[ALP] = 1 \mu M$ ,  $[C_{16}DPA \cdot Zn^{2+}] = 50 \mu M$ ,  $[PNPP] = 100 \mu M$ ,  $[BPNPP] = 100 \mu M$ ,  $[uranyl\ acetate] = 0.1\%$   $[HEPES] = 5\ mM$ ,  $pH\ 7.0$ ,  $T = 25\ ^\circ C$ .

**Table S1** Calculated  $K_{cat}$ ,  $K_M$ ,  $V_{max}$  and  $K_{cat}/K_M$  values for PNPP and BPNPP

| System                                                    | $V_{max}$ ( $\mu M/min$ ) | $K_M$ ( $\mu M$ ) | $K_{cat}$ (/min) | $K_{cat}/K_M$ ( $/\mu M/min$ ) |
|-----------------------------------------------------------|---------------------------|-------------------|------------------|--------------------------------|
| <b>PNPP (ALP)</b>                                         | $63.26 \pm 5$             | $136 \pm 9$       | $632.55 \pm 54$  | 4.648                          |
| <b>PNPP (<math>C_{16}DPA \cdot Zn^{2+} + ALP</math>)</b>  | $75.73 \pm 4.3$           | $36 \pm 5$        | $757.26 \pm 43$  | 20.779                         |
| <b>BPNPP (ALP)</b>                                        | $61.98 \pm 6.2$           | $190 \pm 14$      | $61.98 \pm 6.2$  | 0.3262                         |
| <b>BPNPP (<math>C_{16}DPA \cdot Zn^{2+} + ALP</math>)</b> | $72.07 \pm 4.7$           | $89 \pm 7$        | $72.07 \pm 4.2$  | 0.8097                         |

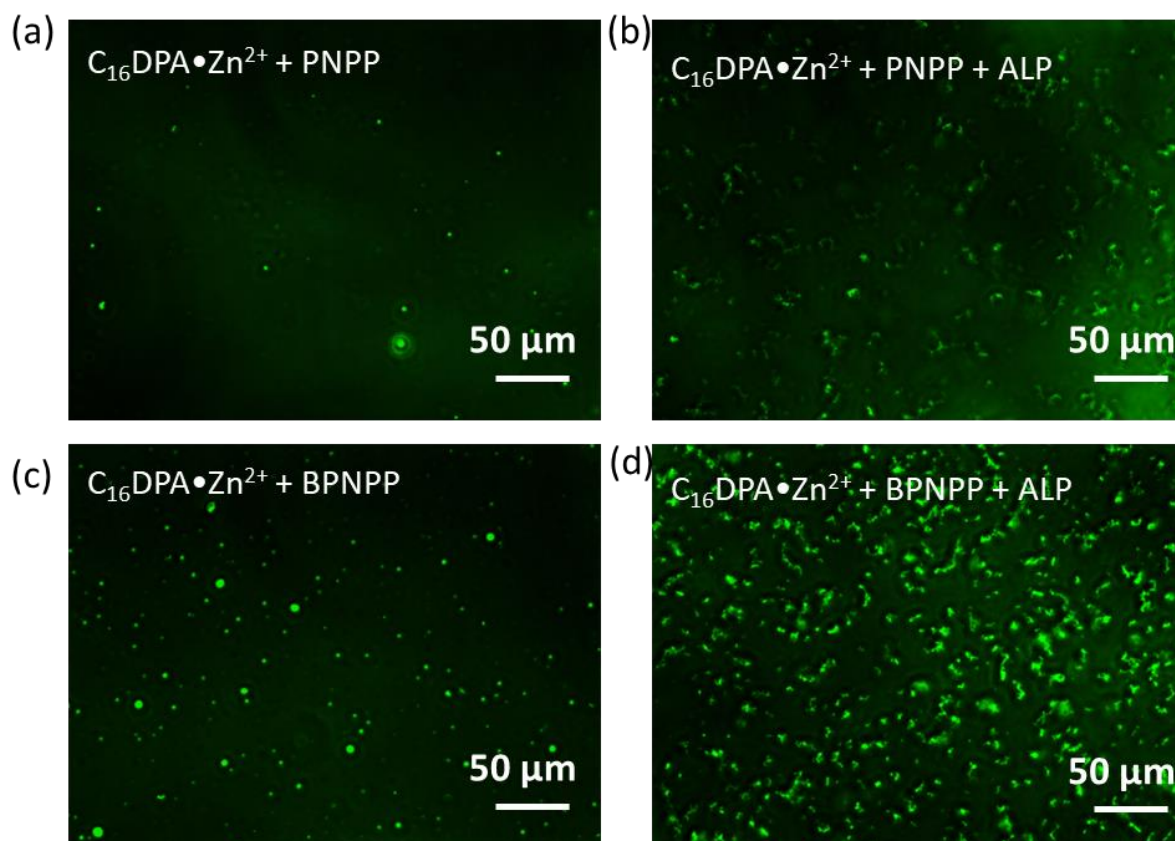

**Fig. S28.** Fluorescence Microscopic images of (a) C<sub>16</sub>DPA•Zn<sup>2+</sup> -PNPP (b) C<sub>16</sub>DPA•Zn<sup>2+</sup>- PNPP in presence of ALP images were taken after 1h of ALP addition (c) C<sub>16</sub>DPA•Zn<sup>2+</sup> -BPNPP (d) C<sub>16</sub>DPA•Zn<sup>2+</sup>- BPNPP in presence of ALP images were taken after 1h of ALP addition. Experimental conditions: [ALP] = 1 μM, [C<sub>16</sub>DPA•Zn<sup>2+</sup>] = 50 μM, [PNPP]= 100 μM, [BPNPP]= 100 μM, [C153] = 1 μM, [HEPES] = 5 mM, pH 7.0, T = 25 °C.



## DLS Study

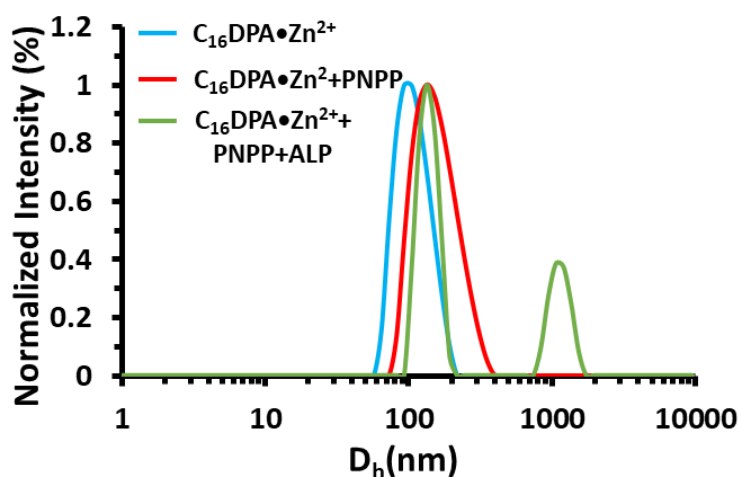

**Fig. S29.** DLS plot shows  $D_h$  (hydrodynamic diameter) of  $C_{16}DPA \bullet Zn^{2+}$ ,  $C_{16}DPA \bullet Zn^{2+} + ALP$  (after 1h),  $C_{16}DPA \bullet Zn^{2+} + ALP + PNPP$  (after 1h). Experimental conditions:  $[ALP] = 100 \text{ nM}$ ,  $[C_{16}DPA \bullet Zn^{2+}] = 50 \text{ } \mu\text{M}$ ,  $[PNPP] = 100 \text{ } \mu\text{M}$ ,  $[HEPES] = 5 \text{ mM}$ ,  $\text{pH } 7.0$ ,  $T = 25 \text{ } ^\circ\text{C}$ .

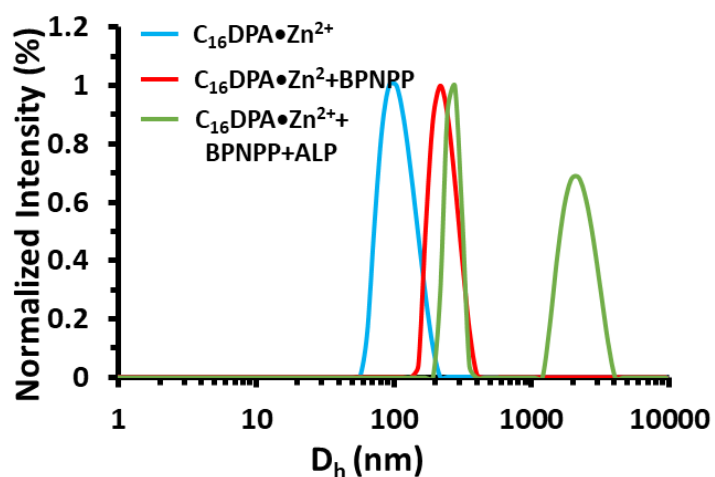

**Fig. S30.** DLS plot shows  $D_h$  (hydrodynamic diameter) of  $C_{16}DPA \bullet Zn^{2+}$ ,  $C_{16}DPA \bullet Zn^{2+} + ALP$  (after 1h),  $C_{16}DPA \bullet Zn^{2+} + ALP + BPNPP$  (after 1h). Experimental conditions:  $[ALP] = 100 \text{ nM}$ ,  $[C_{16}DPA \bullet Zn^{2+}] = 50 \text{ } \mu\text{M}$ ,  $[BPNPP] = 100 \text{ } \mu\text{M}$ ,  $[HEPES] = 5 \text{ mM}$ ,  $\text{pH } 7.0$ ,  $T = 25 \text{ } ^\circ\text{C}$ .

## 6. Catalytic Activity with Nucleotides-HPLC Study

### Calibration Plots:

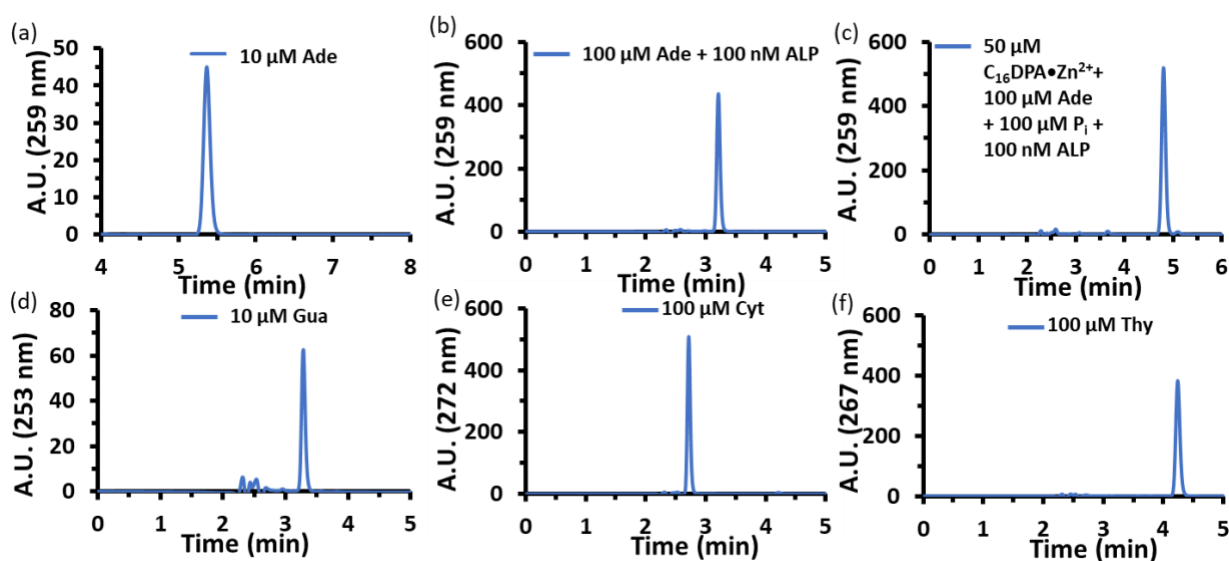

**Fig. S31.** HPLC Calibration Plot of (a) 10  $\mu\text{M}$  Adenosine (b) 100  $\mu\text{M}$  Adenosine with ALP (c) 100  $\mu\text{M}$  Adenosine in presence of  $\text{C}_{16}\text{DPA}\cdot\text{Zn}^{2+}$ ,  $\text{Na}_2\text{HPO}_4$ , and ALP (d) 10  $\mu\text{M}$  Guanosine (e) 100  $\mu\text{M}$  Cytidine (f) 100  $\mu\text{M}$  Thymidine. Experimental conditions:  $[\text{ALP}] = 100 \text{ nM}$ ,  $[\text{C}_{16}\text{DPA}\cdot\text{Zn}^{2+}] = 50 \mu\text{M}$ ,  $[\text{Na}_2\text{HPO}_4] = 100 \mu\text{M}$   $[\text{HEPES}] = 5 \text{ mM}$ ,  $\text{pH } 7.0$ ,  $T = 25 \text{ }^\circ\text{C}$ .

**Table. S2** HPLC Retention Time of Nucleosides

| Nucleosides                                                                   | Retention Time (min) |
|-------------------------------------------------------------------------------|----------------------|
| Adenosine                                                                     | 5.2                  |
| Guanosine                                                                     | 3.3                  |
| Cytidine                                                                      | 2.8                  |
| Thymidine                                                                     | 4.2                  |
| Adenosine + ALP (in buffer)                                                   | 3.2                  |
| $\text{C}_{16}\text{DPA}\cdot\text{Zn}^{2+}$ + Adenosine + $\text{P}_i$ + ALP | 4.9                  |

### Binding of ALP with Adenosine

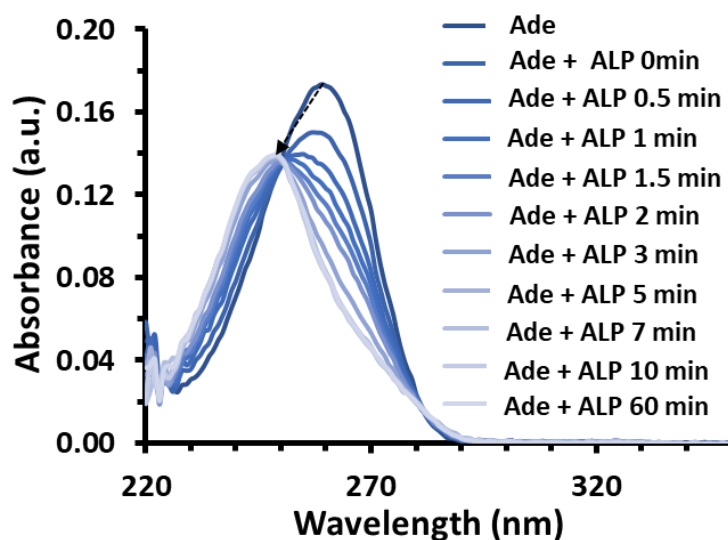

**Fig. S32.** Representative Absorbance Plot of Adenosine in the Presence of ALP. Experimental conditions: [ALP] = 100 nM, [Adenosine] = 10  $\mu$ M [HEPES] = 5 mM, pH 7.0, T = 25  $^{\circ}$ C.

### Control experiments of Catalytic activity of AMP with $C_{16}DPA \bullet Zn^{2+}$ :

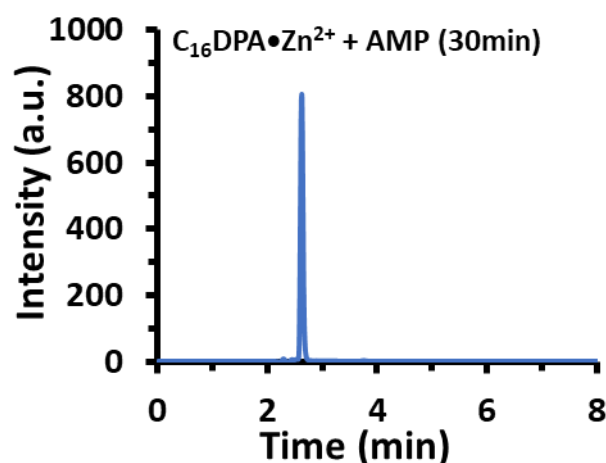

**Fig. S33.** HPLC Chromatogram of AMP catalysis with  $C_{16}DPA \bullet Zn^{2+}$  after 30 min of incubation. No product formation was observed with only  $C_{16}DPA \bullet Zn^{2+}$ . The product was separated by C18 column using phosphate buffer/MeOH (80:20; v/v). Experimental conditions: [ $C_{16}DPA \bullet Zn^{2+}$ ] = 50  $\mu$ M, [AMP] = 100  $\mu$ M, [HEPES] = 5 mM, pH 7.0, T = 25

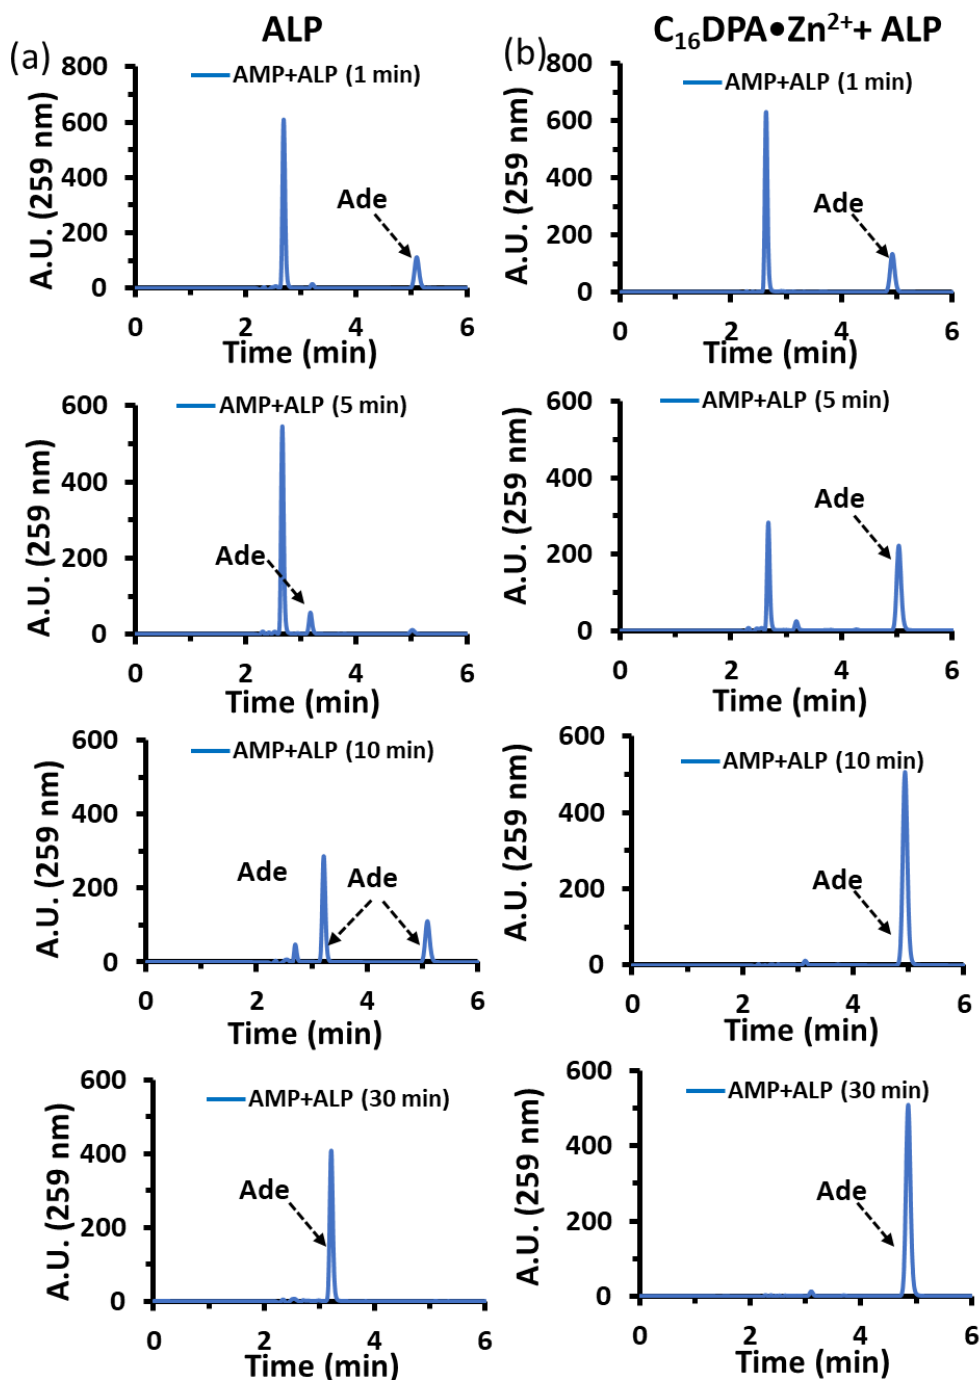

**Fig. S34.** HPLC Chromatogram of AMP catalysis over time with (a) ALP (b)  $C_{16}DPA \cdot Zn^{2+} + ALP$ . The product was separated by C18 column using phosphate buffer/MeOH (80:20; v/v). Experimental conditions: [ALP] = 100 nM, [ $C_{16}DPA \cdot Zn^{2+}$ ] = 50  $\mu$ M, [AMP] = 100  $\mu$ M, [HEPES] = 5 mM, pH 7.0, T = 25  $^{\circ}$ C.

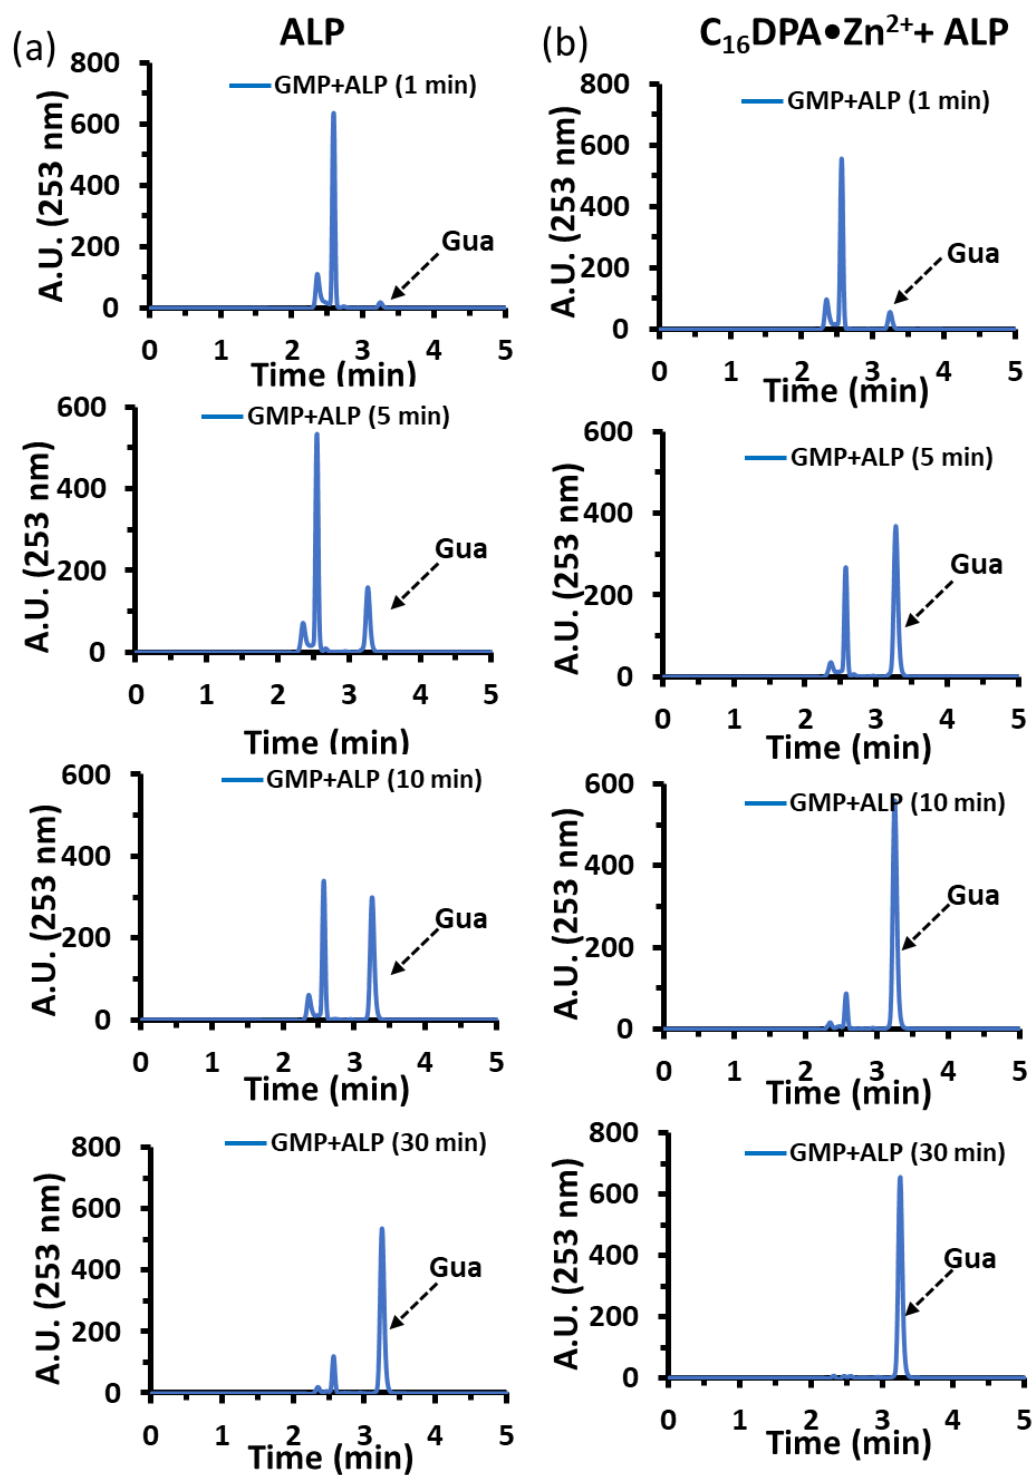

**Fig. S35.** HPLC Chromatogram of GMP catalysis over time with (a) ALP (b) C<sub>16</sub>DPA•Zn<sup>2+</sup> + ALP. The product was separated by C18 column using phosphate buffer/MeOH (80:20; v/v). Experimental conditions: [ALP] = 100 nM, [C<sub>16</sub>DPA•Zn<sup>2+</sup>] = 50 μM, [AMP] = 100 μM [HEPES] = 5 mM, pH 7.0, T = 25 °C.

**Table S3 Calculated  $K_{cat}$ ,  $K_M$ ,  $V_{max}$  and  $K_{cat}/K_M$  values for AMP and GMP**

| System                                                        | $V_{max}$ ( $\mu\text{M}/\text{min}$ ) | $K_M$ ( $\mu\text{M}$ ) | $K_{cat}$ (/min) | $K_{cat}/K_M$ ( $/\mu\text{M}/\text{min}$ ) |
|---------------------------------------------------------------|----------------------------------------|-------------------------|------------------|---------------------------------------------|
| AMP (ALP)                                                     | $10.5 \pm 2.2$                         | $90 \pm 7$              | $105 \pm 22$     | 1.17                                        |
| AMP ( $\text{C}_{16}\text{DPA} \bullet \text{Zn}^{2+}$ + ALP) | $20.5 \pm 1.8$                         | $10 \pm 1.4$            | $205 \pm 18$     | 20.5                                        |
| GMP (ALP)                                                     | $17.5 \pm 1.5$                         | $125 \pm 9$             | $175 \pm 15$     | 1.4                                         |
| GMP ( $\text{C}_{16}\text{DPA} \bullet \text{Zn}^{2+}$ + ALP) | $18.2 \pm 2.1$                         | $8 \pm 1$               | $182 \pm 21$     | 22.75                                       |

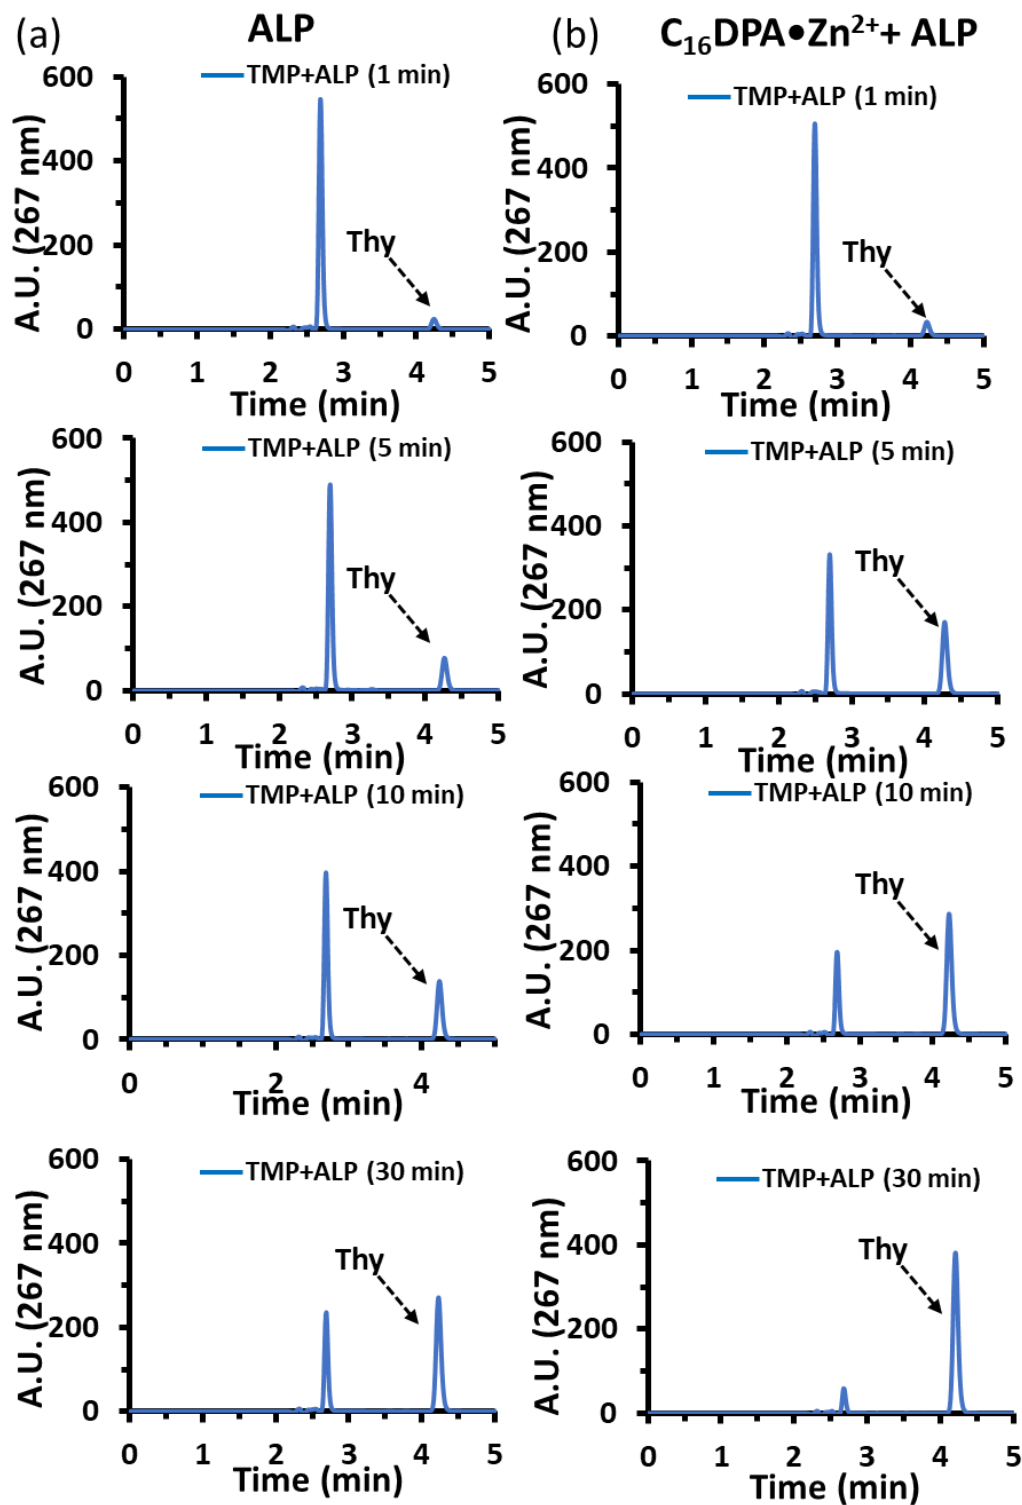

**Fig. S36.** HPLC Chromatogram of TMP catalysis over time with (a) ALP (b)  $C_{16}DPA \bullet Zn^{2+} + ALP$ . The product was separated by C18 column using phosphate buffer/MeOH (80:20; v/v). Experimental conditions:  $[ALP] = 100 \text{ nM}$ ,  $[C_{16}DPA \bullet Zn^{2+}] = 50 \text{ } \mu\text{M}$ ,  $[AMP] = 100 \text{ } \mu\text{M}$   $[HEPES] = 5 \text{ mM}$ , pH 7.0,  $T = 25 \text{ } ^\circ\text{C}$ .

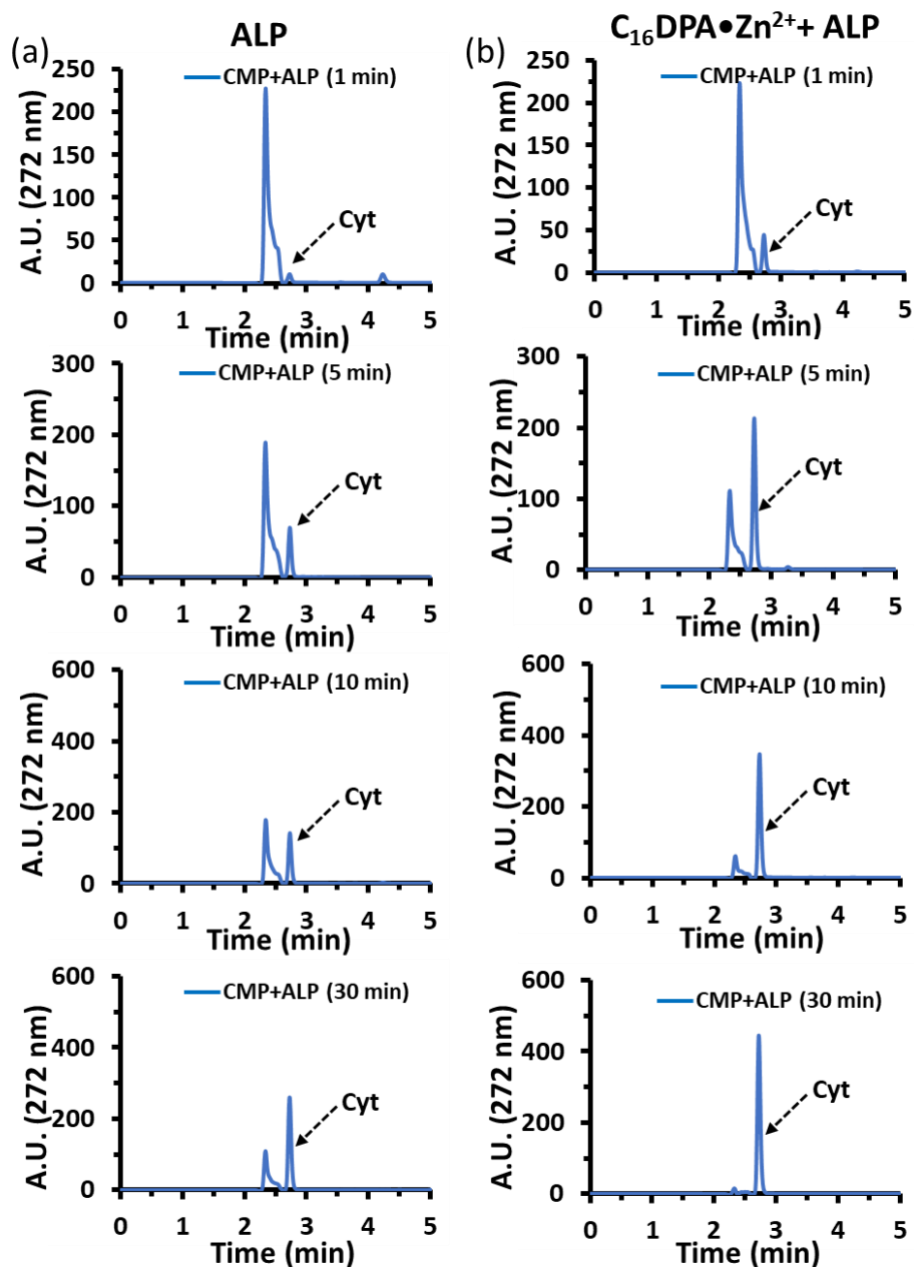

**Fig. S37.** HPLC Chromatogram of CMP catalysis over time with (a) ALP (b)  $C_{16}DPA \cdot Zn^{2+} + ALP$ . The product was separated by C18 column using phosphate buffer/MeOH (80:20; v/v). Experimental conditions:  $[ALP] = 100 \text{ nM}$ ,  $[C_{16}DPA \cdot Zn^{2+}] = 50 \text{ } \mu\text{M}$ ,  $[AMP] = 100 \text{ } \mu\text{M}$   $[HEPES] = 5 \text{ mM}$ , pH 7.0,  $T = 25 \text{ } ^\circ\text{C}$ .



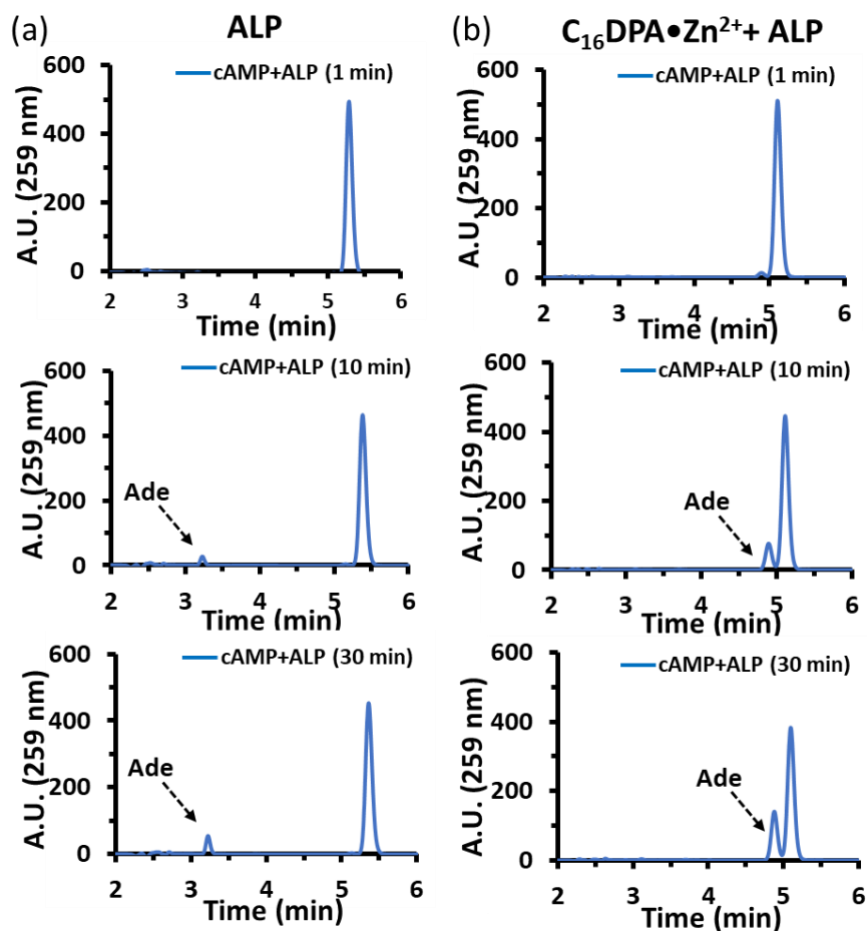

**Fig. S38.** HPLC Chromatogram of cAMP catalysis over time with (a) ALP (b)  $C_{16}DPA \cdot Zn^{2+} + ALP$ . The product was separated by C18 column using phosphate buffer/MeOH (80:20; v/v). Experimental conditions: [ALP] = 100 nM, [  $C_{16}DPA \cdot Zn^{2+}$  ] = 50  $\mu$ M, [AMP] = 100  $\mu$ M [HEPES] = 5 mM, pH 7.0, T = 25  $^{\circ}$ C.

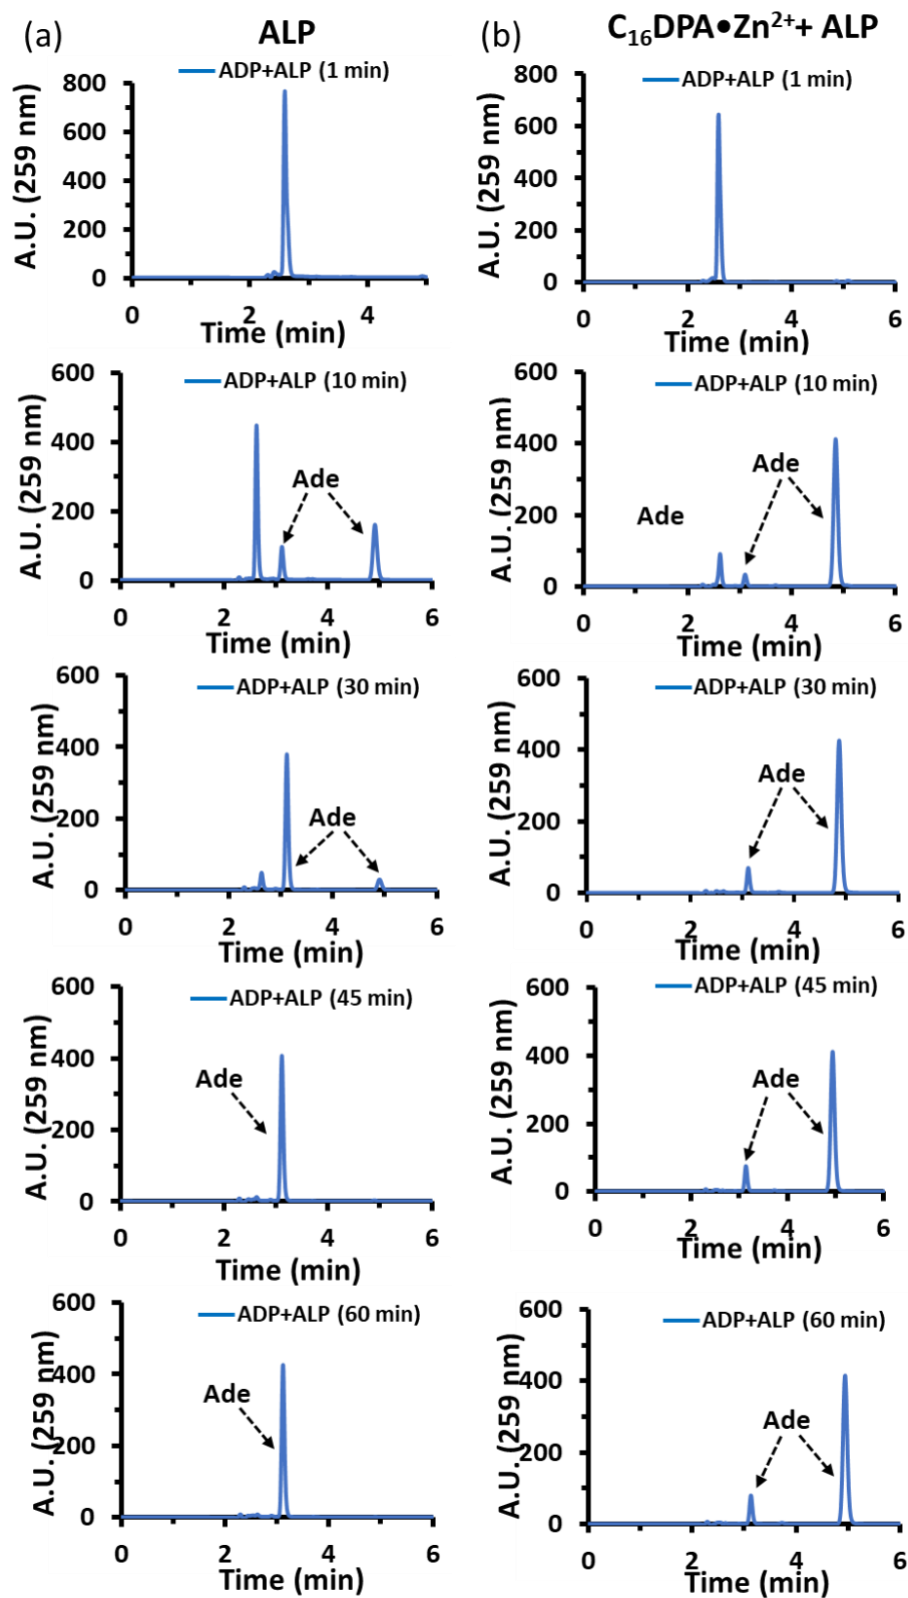

**Fig. S39.** HPLC Chromatogram of ADP catalysis over time with (a) ALP (b)  $C_{16}DPA \cdot Zn^{2+} + ALP$ . The product was separated by C18 column using phosphate buffer/MeOH (80:20; v/v). Experimental conditions: [ALP] = 100 nM, [  $C_{16}DPA \cdot Zn^{2+}$  ] = 50  $\mu$ M, [AMP] = 100  $\mu$ M [HEPES] = 5 mM, pH 7.0, T = 25  $^{\circ}$ C.

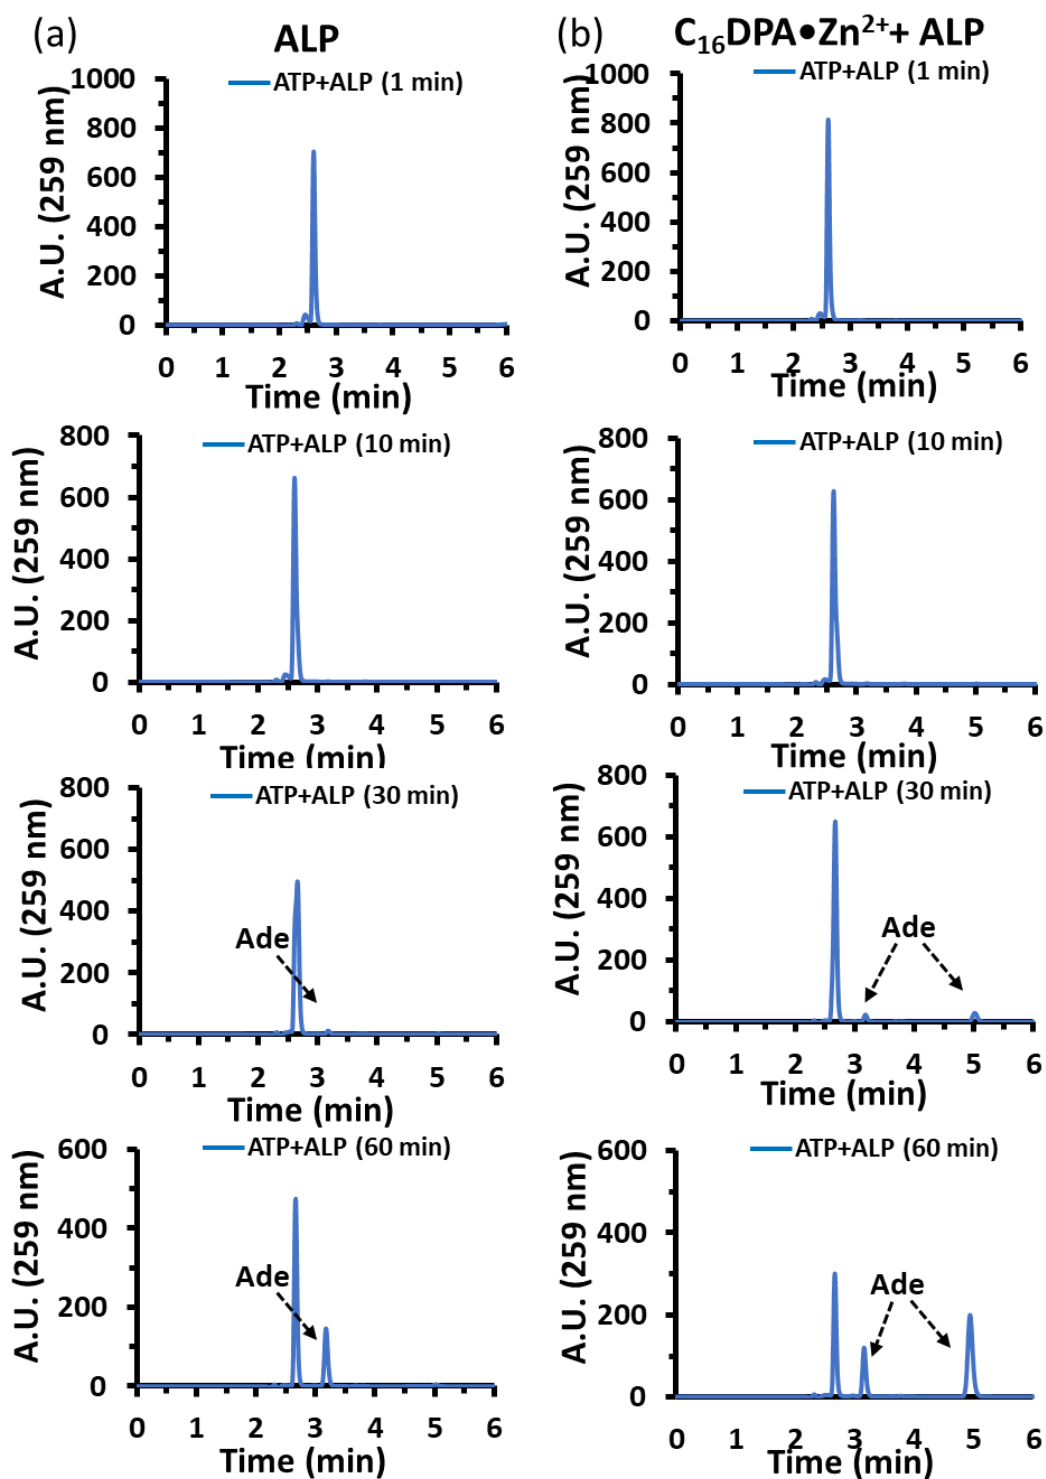

**Fig. S40.** HPLC Chromatogram of ATP catalysis over time with (a) ALP (b)  $C_{16}DPA \cdot Zn^{2+} + ALP$ . The product was separated by C18 column using phosphate buffer/MeOH (80:20; v/v). Experimental conditions:  $[ALP] = 100 \text{ nM}$ ,  $[C_{16}DPA \cdot Zn^{2+}] = 50 \text{ } \mu\text{M}$ ,  $[AMP] = 100 \text{ } \mu\text{M}$   $[HEPES] = 5 \text{ mM}$ , pH 7.0,  $T = 25 \text{ } ^\circ\text{C}$ .

## 7. Complex properties in the presence of nucleotides

### CD Study

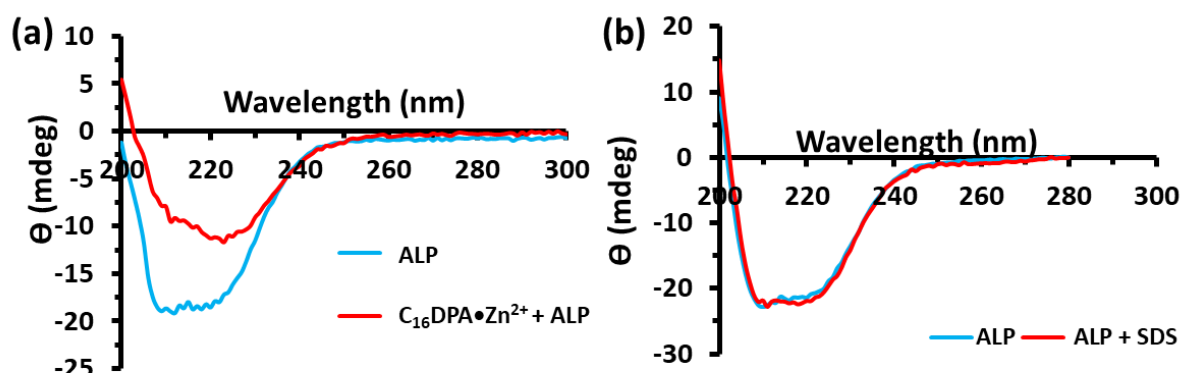

**Fig. S41.** Circular Dichroism (CD) spectra of (a) only ALP and  $C_{16}DPA \bullet Zn^{2+} + ALP$  (b) only ALP (2  $\mu M$ ) and SDS + ALP. Experimental conditions: [ALP] = 2  $\mu M$ , [ $C_{16}DPA \bullet Zn^{2+}$ ] = 50  $\mu M$ , [SDS] = 50  $\mu M$ , CD cuvette pathlength = 1mm, [HEPES] = 5 mM, pH 7.0, T = 25  $^{\circ}C$ . CD data suggest that the secondary structure of ALP remains intact in the presence of 50  $\mu M$  SDS (used in our experiments).

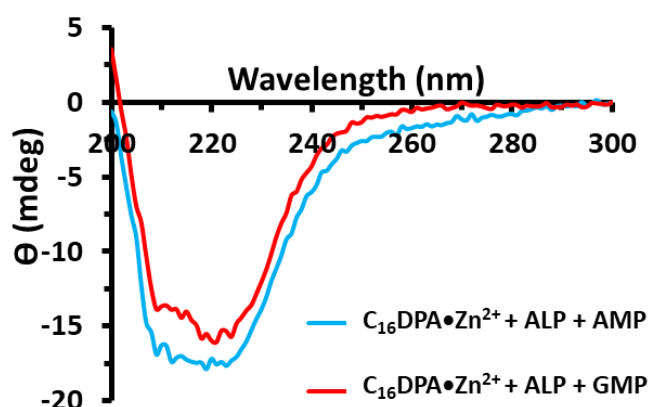

**Fig. S42.** Circular Dichroism (CD) spectra of  $C_{16}DPA \bullet Zn^{2+} + ALP$  with AMP and GMP. Experimental conditions: [ALP] = 2  $\mu M$ , [ $C_{16}DPA \bullet Zn^{2+}$ ] = 50  $\mu M$ , [Nucleotides] = 100  $\mu M$ , CD cuvette pathlength = 1mm, [HEPES] = 5 mM, pH 7.0, T = 25  $^{\circ}C$ .

**Table. S4** Percentage content of alpha helix and beta sheet of ALP in coassembly with metallosurfactant and nucleotides

| System                                  | $\alpha$ - Helix | $\beta$ - Sheets |
|-----------------------------------------|------------------|------------------|
| ALP                                     | 39.8             | 18.2             |
| $C_{16}DPA \bullet Zn^{2+} + ALP$       | 6.6              | 13.7             |
| $C_{16}DPA \bullet Zn^{2+} + ALP + AMP$ | 36.3             | 19.2             |
| $C_{16}DPA \bullet Zn^{2+} + ALP + GMP$ | 30.8             | 17.9             |

## Zeta Potential

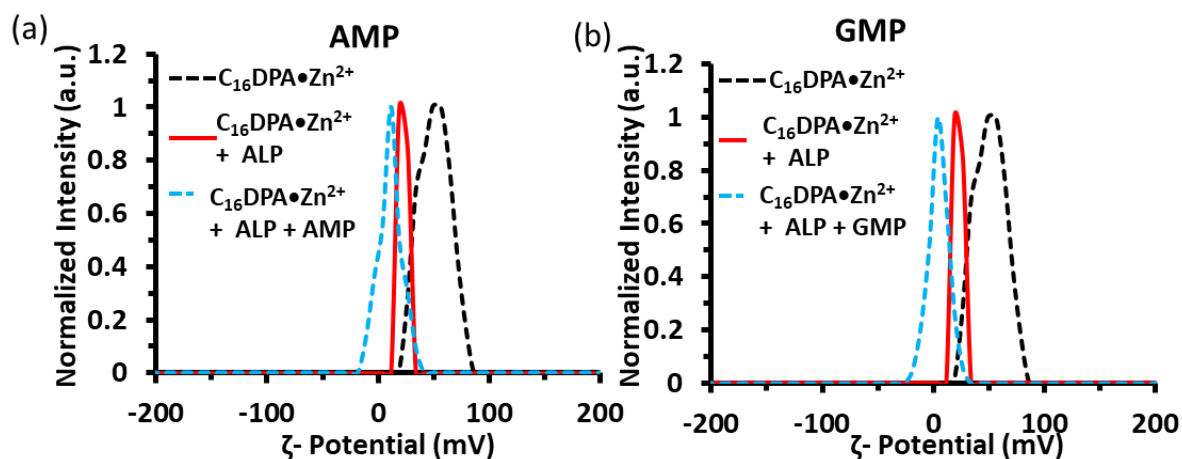

**Fig. S43.** Zeta potential of only  $C_{16}DPA \bullet Zn^{2+}$  and  $C_{16}DPA \bullet Zn^{2+}$ -ALP in the presence of (a) AMP and (b) GMP. Experimental conditions:  $[ALP] = 100 \text{ nM}$ ,  $[C_{16}DPA \bullet Zn^{2+}] = 50 \text{ }\mu\text{M}$ ,  $[AMP] = 100 \text{ }\mu\text{M}$ ,  $[GMP] = 100 \text{ }\mu\text{M}$ ,  $[HEPES] = 5 \text{ mM}$ ,  $\text{pH } 7.0$ ,  $T = 25 \text{ }^\circ\text{C}$ .

## Fluorescence Study

### With C153

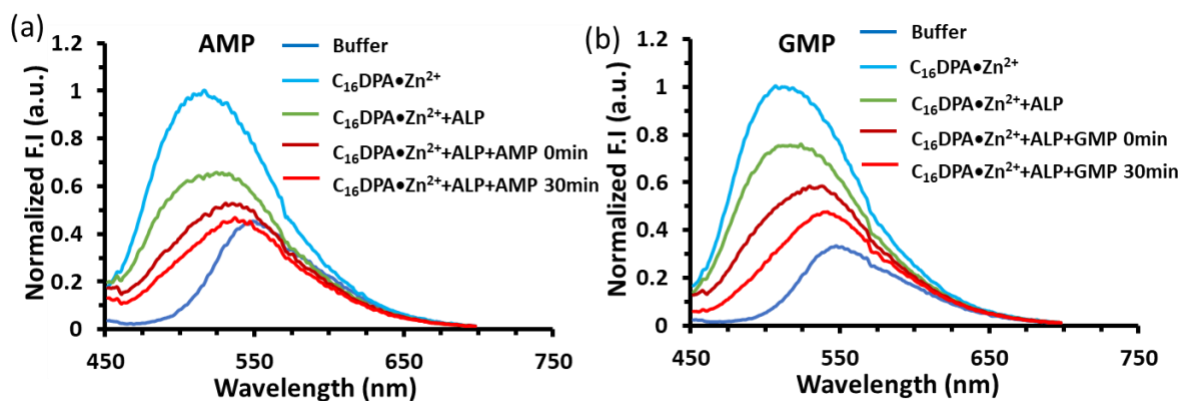

**Fig. S44.** Characteristic Fluorescence emission spectra of C153 in the presence of surfactant, ALP (a) AMP and (b) GMP showing coassembly. Experimental conditions:  $[ALP] = 100 \text{ nM}$ ,  $[C153] = 1 \text{ }\mu\text{M}$ ,  $[C_{16}DPA \bullet Zn^{2+}] = 50 \text{ }\mu\text{M}$ ,  $[AMP] = 100 \text{ }\mu\text{M}$ ,  $[GMP] = 100 \text{ }\mu\text{M}$ , slit width ex/em = 5/5 nm, Excitation wavelength = 430nm,  $[HEPES] = 5 \text{ mM}$ ,  $\text{pH } 7.0$ ,  $T = 25 \text{ }^\circ\text{C}$ .

## FRET Using FITC-ALP and Nile Red in the Presence of Nucleotides

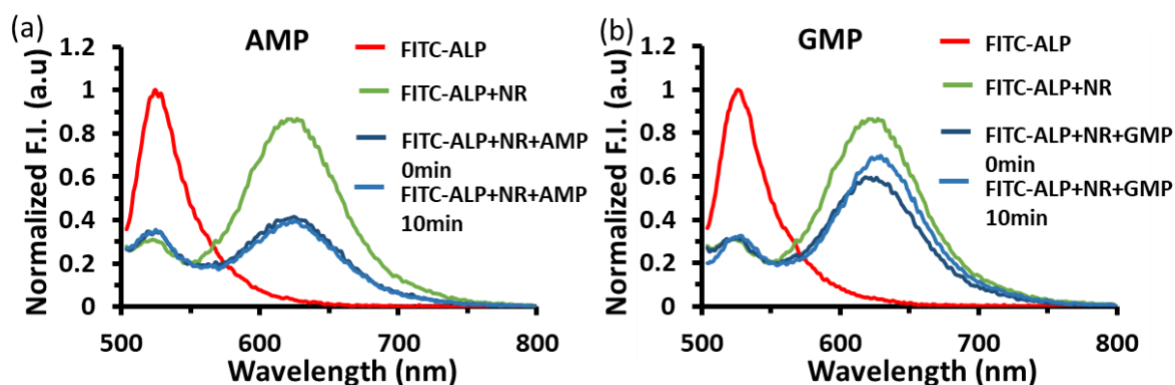

**Fig. S45.** Characteristic Fluorescence emission spectra showing FRET between FITC tagged ALP and Nile red in the presence of (a) AMP and (b) GMP. Experimental conditions: [FITC-ALP] = 100 nM, [Nile Red] = 500 nM, [C<sub>16</sub>DPA•Zn<sup>2+</sup>] = 50 μM, [AMP] = 100 μM, [GMP] = 100 μM, slit width ex/em = 5/5 nm, Excitation wavelength = 492nm, [HEPES] = 5 mM, pH 7.0, T = 25 °C.

$E_{FRET}$  was calculated using the equation

$$E_{FRET} = \frac{(I_{619} - \sigma I_{525})}{(I_{525} + (I_{619} - \sigma I_{525}))}$$

Where  $I_{619}$  and  $I_{525}$  are the Fluorescence Intensity at 619nm and 525nm respectively, and  $\sigma = \frac{I_{619}}{I_{555}}$

**Table. S5**  $E_{FRET}$  in the Presence of Nucleotides.

|                 | $E_{FRET}$ (without Nucleotides) | $E_{FRET}$ (with Nucleotides after 1 min) | $E_{FRET}$ (with Nucleotides after 10 min) |
|-----------------|----------------------------------|-------------------------------------------|--------------------------------------------|
| <b>With AMP</b> | 0.70 ± 0.04                      | 0.53 ± 0.02                               | 0.50 ± 0.03                                |
| <b>With GMP</b> | 0.70 ± 0.04                      | 0.65 ± 0.015                              | 0.67 ± 0.02                                |

Laurden GP value

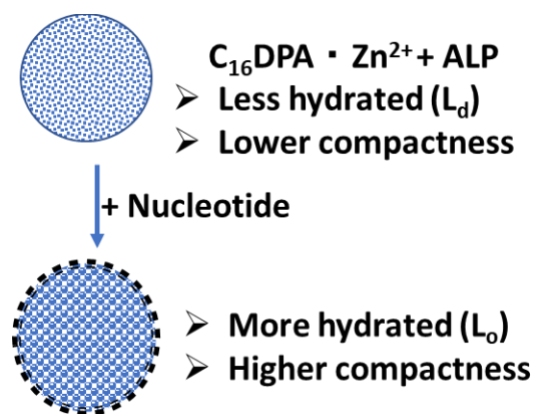

**Fig. S46.** Schematically showing transformation of complex environment in terms of hydration and compactness upon nucleotide binding.

## 8. Catalytic Oligonucleotide Digestion study - HPLC Study

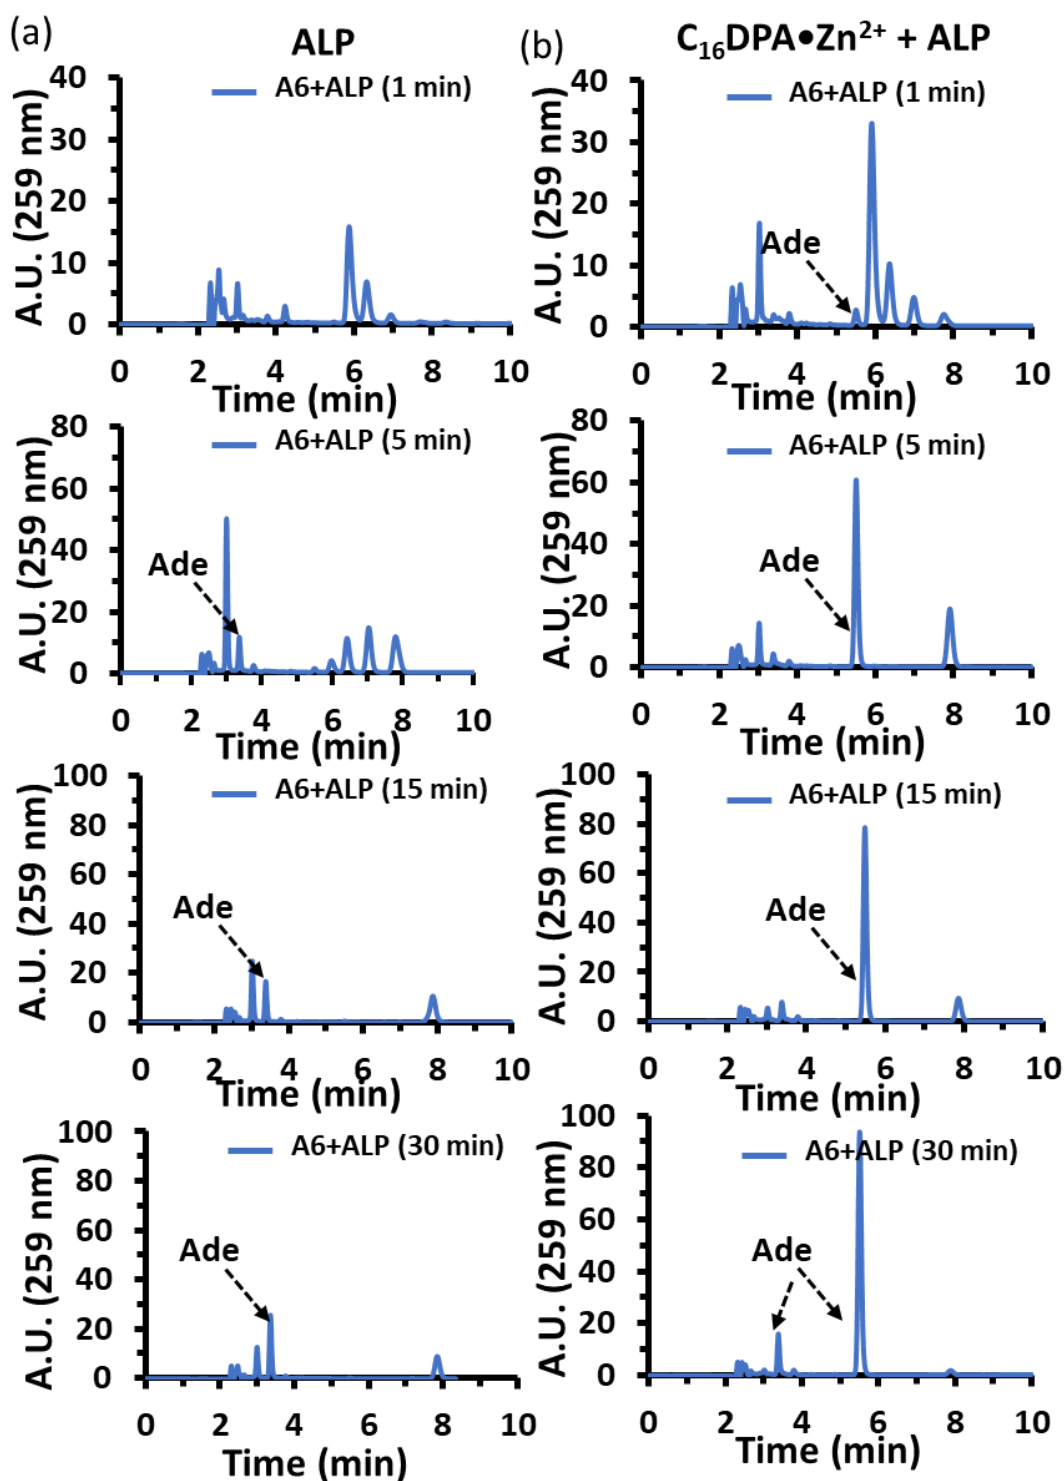

**Fig. S47.** HPLC Chromatogram of A6 catalysis over time with (a) ALP (b)  $C_{16}DPA \cdot Zn^{2+} + ALP$ . The product was separated by C18 column using phosphate buffer/MeOH (80:20; v/v). Experimental conditions: [ALP] = 100 nM, [ $C_{16}DPA \cdot Zn^{2+}$ ] = 50  $\mu$ M, [A6] = 5  $\mu$ M [HEPES] = 5 mM, pH 7.0, T = 25  $^{\circ}$ C.



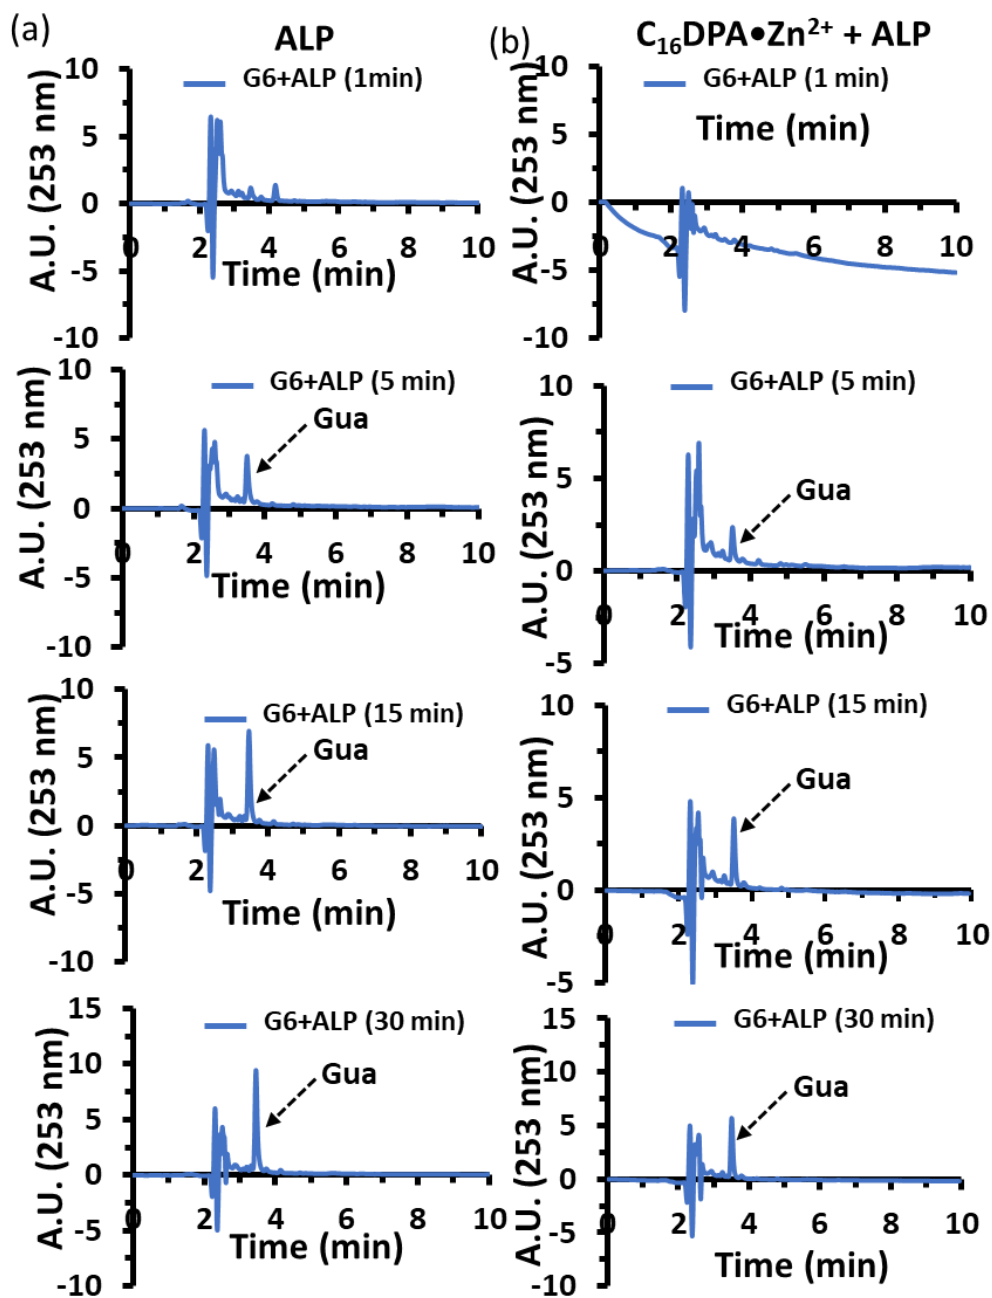

**Fig. S48.** HPLC Chromatogram of G6 catalysis over time with (a) ALP (b)  $C_{16}DPA \cdot Zn^{2+} + ALP$ . The product was separated by C18 column using phosphate buffer/MeOH (80:20; v/v). Experimental conditions:  $[ALP] = 100 \text{ nM}$ ,  $[C_{16}DPA \cdot Zn^{2+}] = 50 \text{ } \mu\text{M}$ ,  $[A6] = 5 \text{ } \mu\text{M}$   $[HEPES] = 5 \text{ mM}$ ,  $\text{pH } 7.0$ ,  $T = 25 \text{ } ^\circ\text{C}$ .

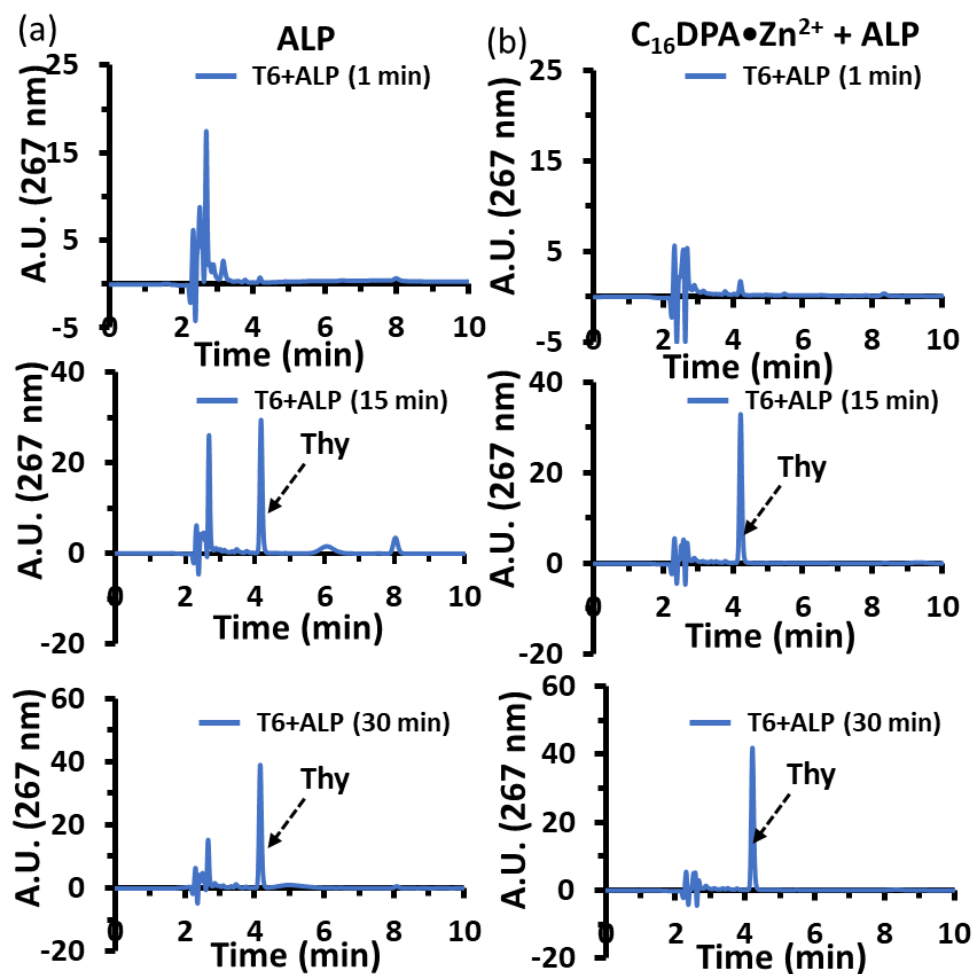

**Fig. S49.** HPLC Chromatogram of T6 catalysis over time with (a) ALP (b)  $C_{16}DPA \bullet Zn^{2+} + ALP$ . The product was separated by C18 column using phosphate buffer/MeOH (80:20; v/v). Experimental conditions: [ALP] = 100 nM, [  $C_{16}DPA \bullet Zn^{2+}$  ] = 50  $\mu$ M, [T6] = 5  $\mu$ M [HEPES] = 5 mM, pH 7.0, T = 25  $^{\circ}$ C.

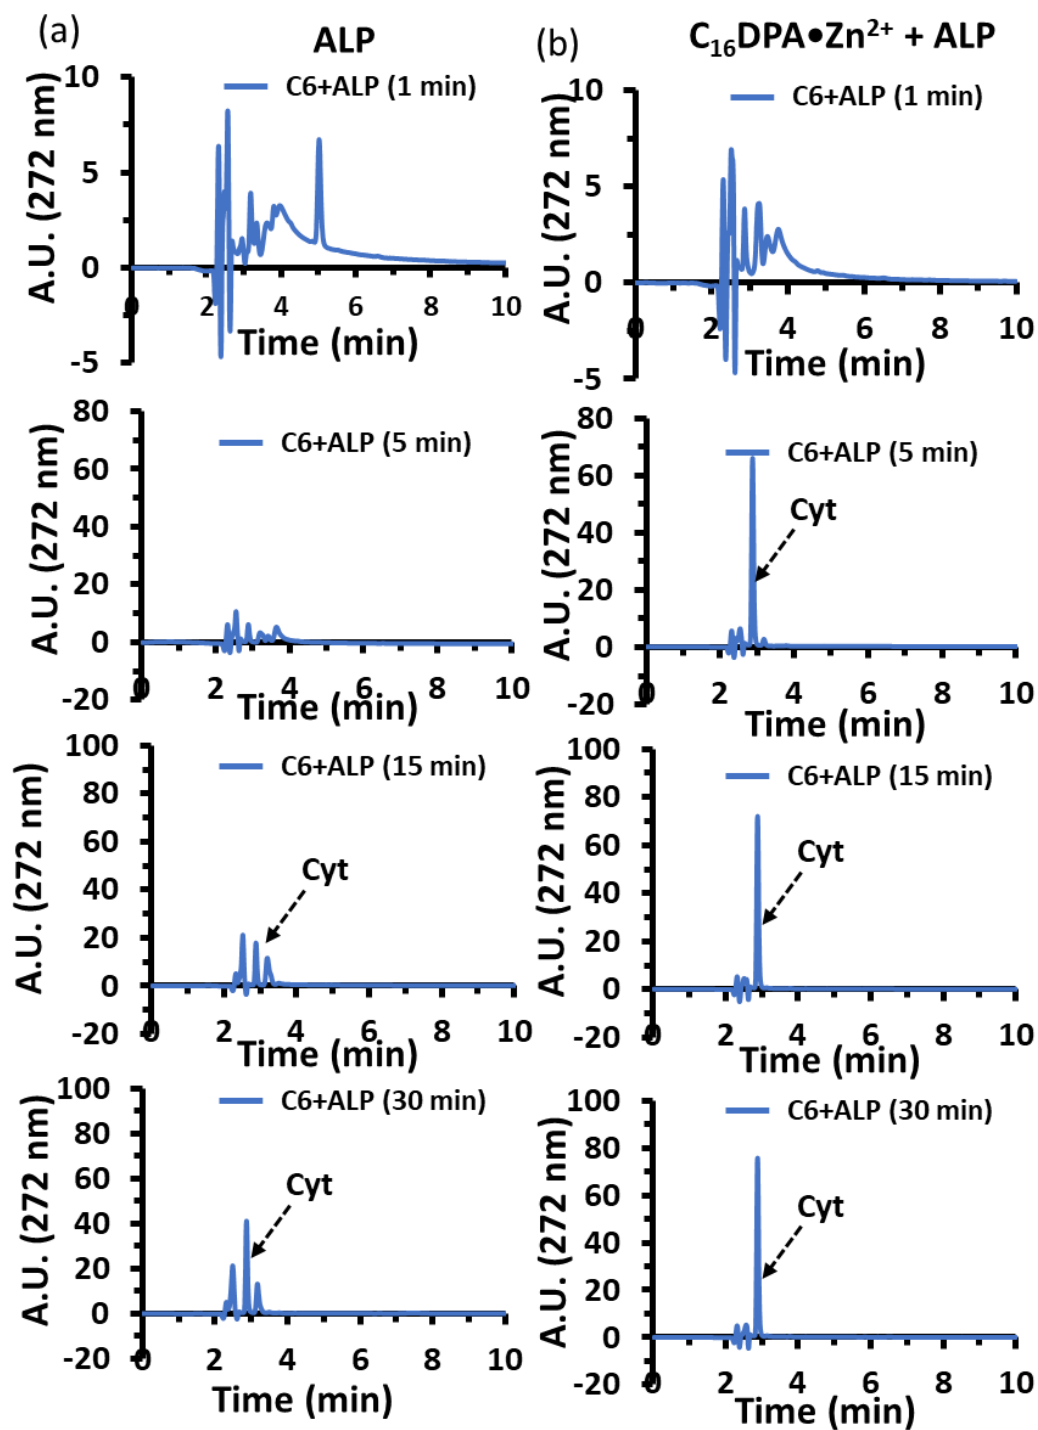

**Fig. S50.** HPLC Chromatogram of C6 catalysis over time with (a) ALP (b)  $C_{16}DPA \cdot Zn^{2+} + ALP$ . The product was separated by C18 column using phosphate buffer/MeOH (80:20; v/v). Experimental conditions:  $[ALP] = 100 \text{ nM}$ ,  $[C_{16}DPA \cdot Zn^{2+}] = 50 \text{ } \mu\text{M}$ ,  $[C6] = 5 \text{ } \mu\text{M}$   $[HEPES] = 5 \text{ mM}$ , pH 7.0,  $T = 25 \text{ } ^\circ\text{C}$ .

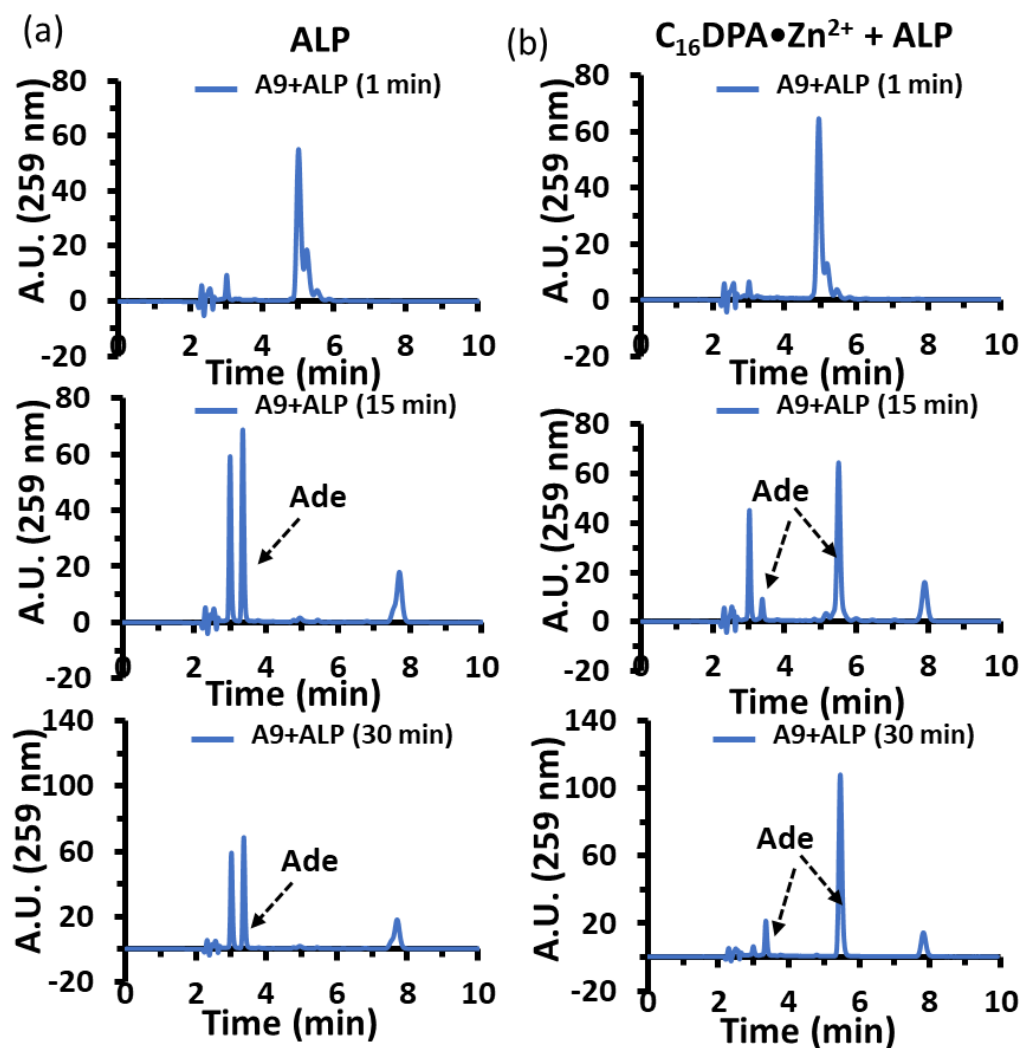

**Fig. S51.** HPLC Chromatogram of A9 catalysis over time with (a) ALP (b)  $C_{16}DPA \bullet Zn^{2+} + ALP$ . The product was separated by C18 column using phosphate buffer/MeOH (80:20; v/v). Experimental conditions: [ALP] = 100 nM, [  $C_{16}DPA \bullet Zn^{2+}$  ] = 50  $\mu$ M, [A9] = 5  $\mu$ M [HEPES] = 5 mM, pH 7.0, T = 25  $^{\circ}$ C.

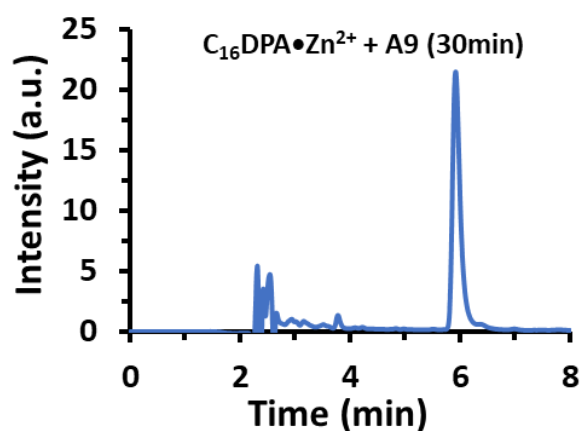

**Fig. S52.** HPLC Chromatogram of A9 catalysis with  $C_{16}DPA \bullet Zn^{2+}$  after 30 min of incubation. No product formation was observed with only  $C_{16}DPA \bullet Zn^{2+}$ . The product was separated by C18 column using

phosphate buffer/MeOH (80:20; v/v). Experimental conditions: [  $C_{16}DPA \cdot Zn^{2+}$  ] = 50  $\mu$ M, [A9] = 5  $\mu$ M, [HEPES] = 5 mM, pH 7.0, T = 25

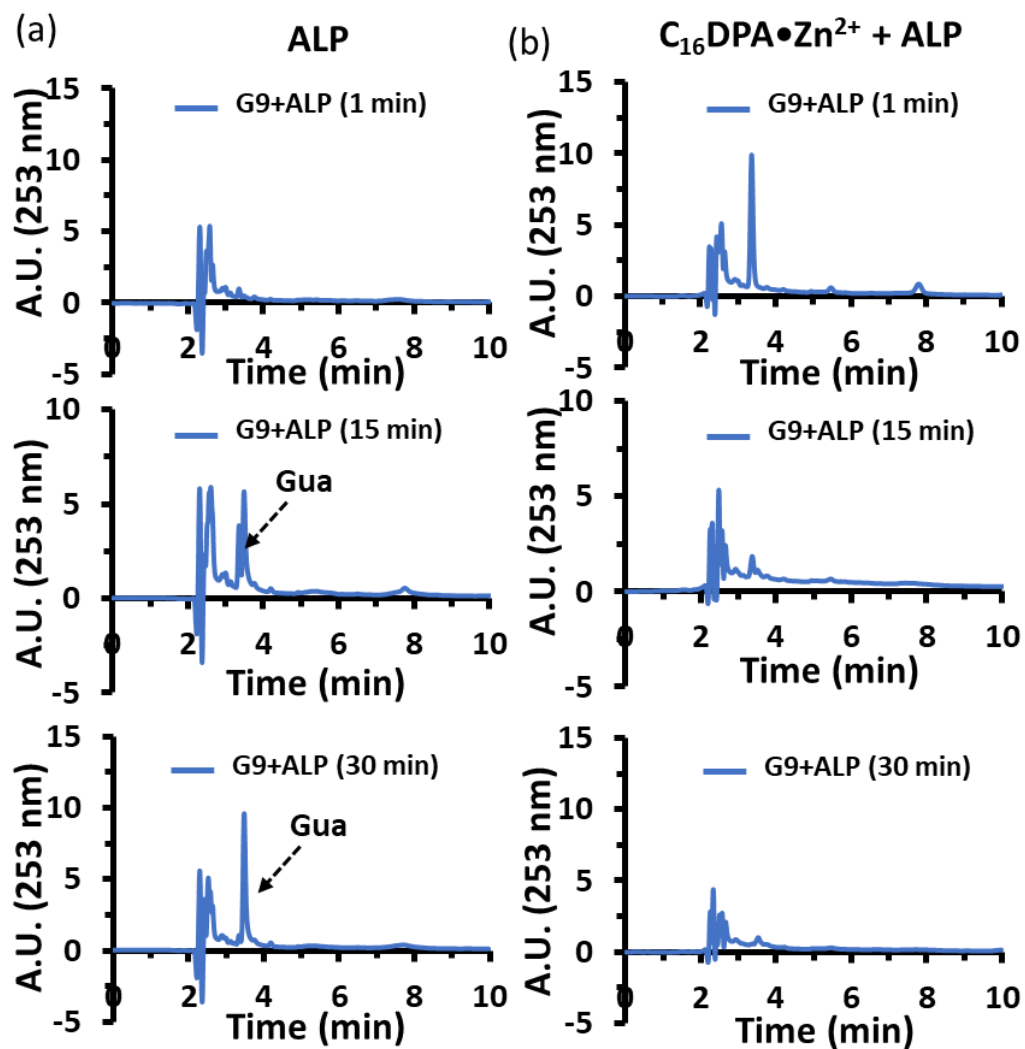

**Fig. S53.** HPLC Chromatogram of G9 catalysis over time with (a) ALP (b)  $C_{16}DPA \cdot Zn^{2+}$  + ALP. The product was separated by C18 column using phosphate buffer/MeOH (80:20; v/v). Experimental conditions: [ALP] = 100 nM, [  $C_{16}DPA \cdot Zn^{2+}$  ] = 50  $\mu$ M, [G9] = 5  $\mu$ M [HEPES] = 5 mM, pH 7.0, T = 25  $^{\circ}$ C.

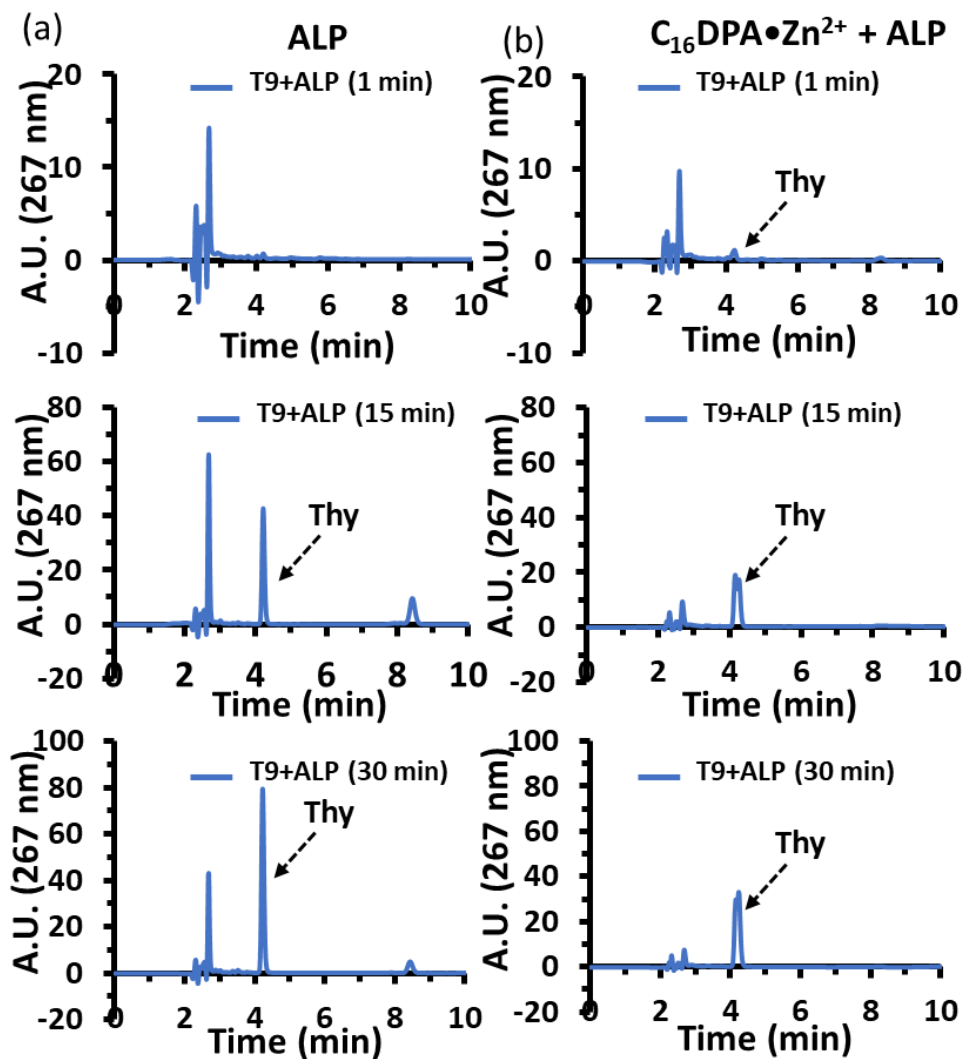

**Fig. S54.** HPLC Chromatogram of T9 catalysis over time with (a) ALP (b)  $C_{16}DPA \cdot Zn^{2+} + ALP$ . The product was separated by C18 column using phosphate buffer/MeOH (80:20; v/v). Experimental conditions:  $[ALP] = 100 \text{ nM}$ ,  $[C_{16}DPA \cdot Zn^{2+}] = 50 \text{ } \mu\text{M}$ ,  $[T9] = 5 \text{ } \mu\text{M}$   $[HEPES] = 5 \text{ mM}$ , pH 7.0,  $T = 25 \text{ } ^\circ\text{C}$ .

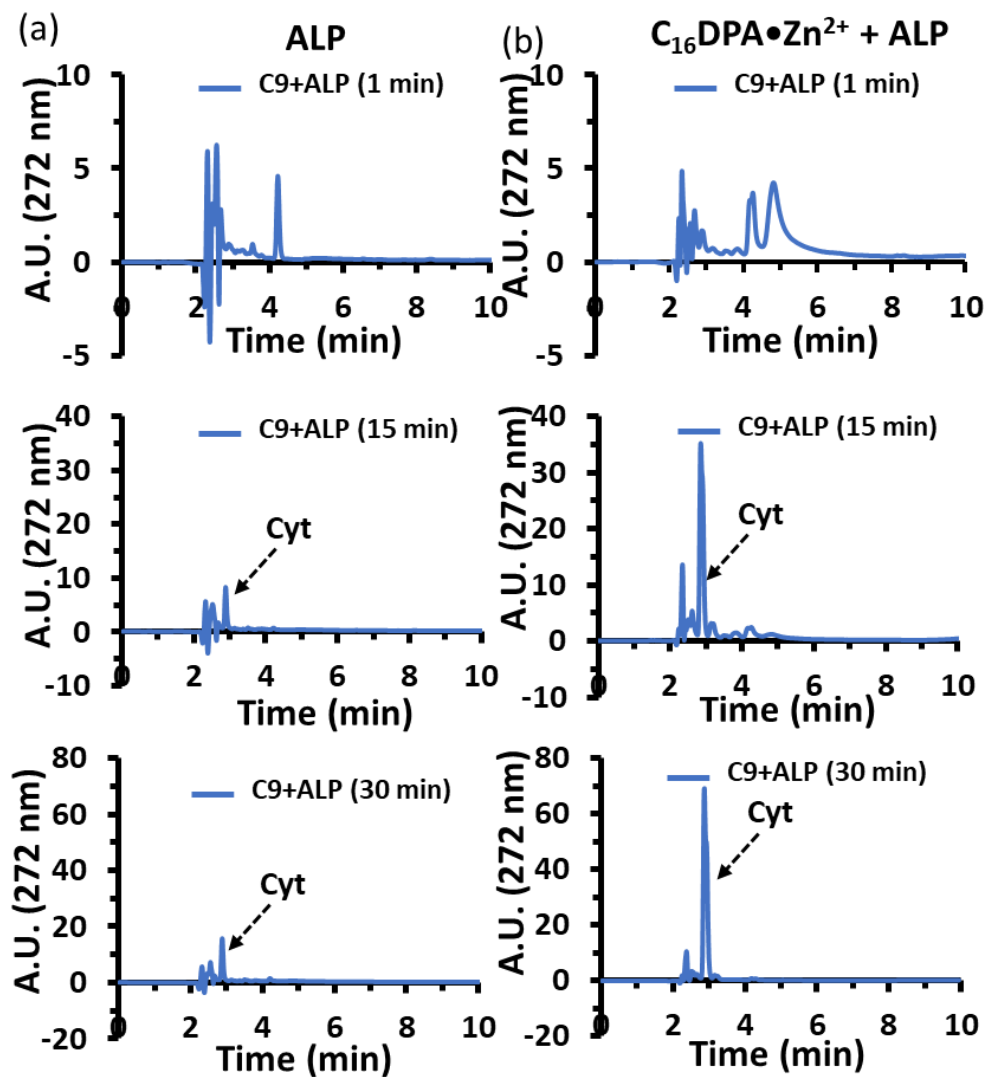

**Fig. S55.** HPLC Chromatogram of C9 catalysis over time with (a) ALP (b)  $C_{16}DPA \bullet Zn^{2+} + ALP$ . The product was separated by C18 column using phosphate buffer/MeOH (80:20; v/v). Experimental conditions: [ALP] = 100 nM, [  $C_{16}DPA \bullet Zn^{2+}$  ] = 50  $\mu$ M, [C9] = 5  $\mu$ M [HEPES] = 5 mM, pH 7.0, T = 25  $^{\circ}$ C.

## 9. Complex Properties in presence of different oligonucleotides

### CD Study

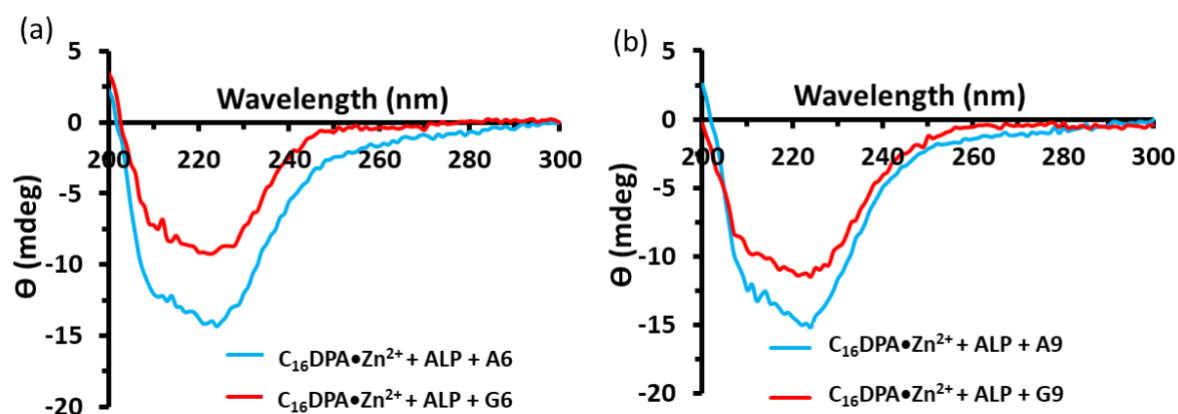

**Fig. S56.** Circular Dichroism (CD) spectra of  $C_{16}DPA \bullet Zn^{2+} + ALP$  with (a) A6, G6, and (b) A9, G9. Experimental conditions:  $[ALP] = 2 \mu M$ ,  $[C_{16}DPA \bullet Zn^{2+}] = 50 \mu M$ , For Fig. (a) and (b) [oligonucleotides] =  $5 \mu M$ , Cuvette pathlength = 1mm, [HEPES] = 5 mM, pH 7.0, T = 25 °C.

**Table. S6** Percentage content of alpha helix and beta sheet of ALP in coassembly with metallosurfactant and Oligonucleotides

| System                                 | $\alpha$ - Helix | $\beta$ - Sheets |
|----------------------------------------|------------------|------------------|
| $C_{16}DPA \bullet Zn^{2+} + ALP + A6$ | 28.5             | 28.9             |
| $C_{16}DPA \bullet Zn^{2+} + ALP + G6$ | 11.2             | 15.4             |
| $C_{16}DPA \bullet Zn^{2+} + ALP + A9$ | 26.2             | 31.9             |
| $C_{16}DPA \bullet Zn^{2+} + ALP + G9$ | 9.5              | 26.1             |
| $C_{16}DPA \bullet Zn^{2+} + ALP$      | 6.6              | 13.7             |



## Fluorescence Study

### With C153

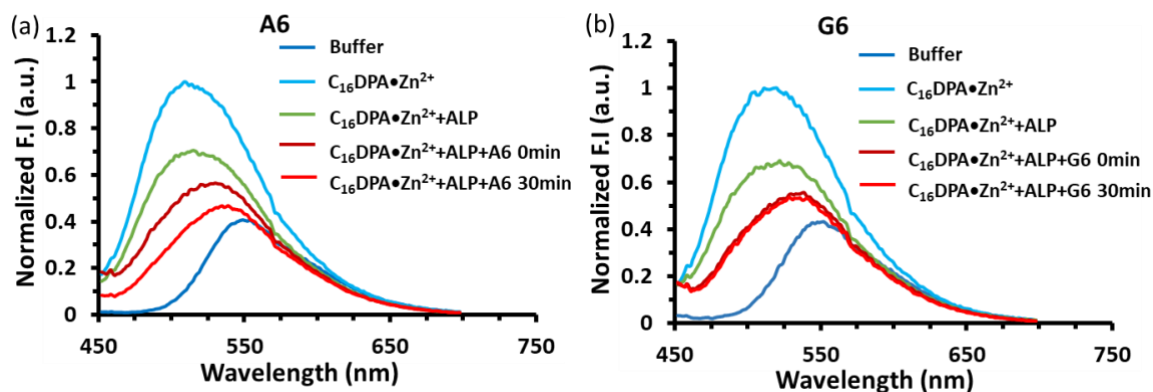

**Fig. S57.** Characteristic Fluorescence emission spectra of C153 in the presence of surfactant, ALP (a) A6 and (b) G6 showing coassembly. Experimental conditions: [ALP] = 100 nM, [C153] = 1  $\mu$ M, [C<sub>16</sub>DPA•Zn<sup>2+</sup>] = 50  $\mu$ M, [oligonucleotides] = 5  $\mu$ M, slit width ex/em = 5/5 nm, Excitation wavelength = 430nm, [HEPES] = 5 mM, pH 7.0, T = 25  $^{\circ}$ C.

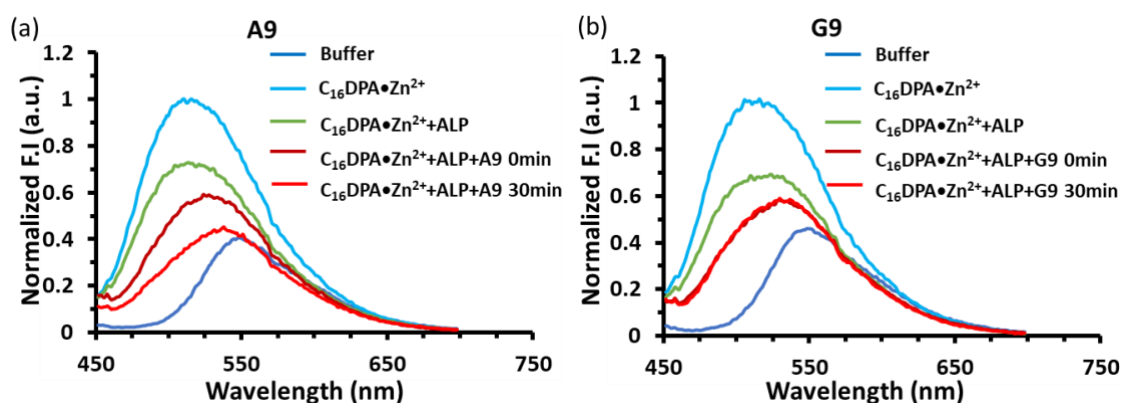

**Fig. S58.** Characteristic Fluorescence emission spectra of C153 in the presence of surfactant, ALP (a) A9 and (b) G9 showing coassembly. Experimental conditions: [ALP] = 100 nM, [C153] = 1  $\mu$ M, [C<sub>16</sub>DPA•Zn<sup>2+</sup>] = 50  $\mu$ M, [oligonucleotides] = 5  $\mu$ M, slit width ex/em = 5/5 nm, Excitation wavelength = 430nm, [HEPES] = 5 mM, pH 7.0, T = 25  $^{\circ}$ C.

### FRET Using FITC-ALP and Nile Red in the Presence of Oligonucleotides

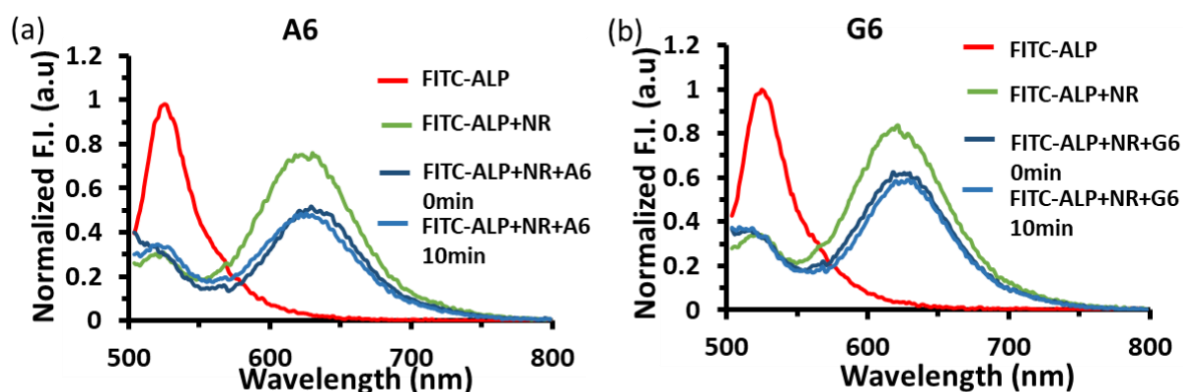

**Fig. S59.** Characteristic Fluorescence emission spectra showing FRET between FITC tagged ALP and Nile red in the presence of (a) A6 and (b) G6. Experimental conditions: [FITC-ALP] = 100 nM, [Nile Red] = 500 nM, [C<sub>16</sub>DPA•Zn<sup>2+</sup>] = 50 μM, [oligonucleotides] = 5 μM, slit width ex/em = 5/5 nm, Excitation wavelength = 492nm, [HEPES] = 5 mM, pH 7.0, T = 25 °C.

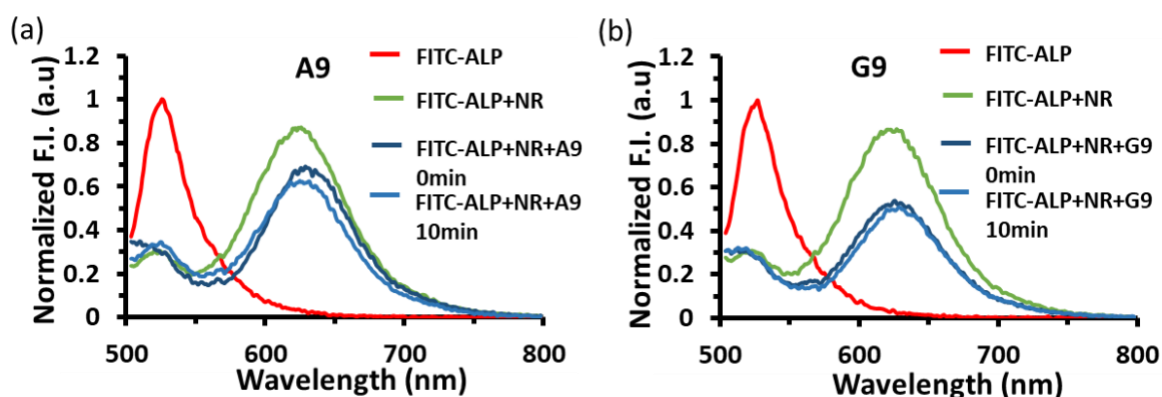

**Fig. S60.** Characteristic Fluorescence emission spectra showing FRET between FITC tagged ALP and Nile red in the presence of (a) A9 and (b) G9. Experimental conditions: [FITC-ALP] = 100 nM, [Nile Red] = 500 nM, [C<sub>16</sub>DPA•Zn<sup>2+</sup>] = 50 μM, [oligonucleotides] = 5 μM, slit width ex/em = 5/5 nm, Excitation wavelength = 492nm, [HEPES] = 5 mM, pH 7.0, T = 25 °C.

**Table. S7**  $E_{FRET}$  in the Presence of Oligonucleotides.

|         | $E_{FRET}$ (without Nucleotides) | $E_{FRET}$ (with Oligonucleotides after 1 min) | $E_{FRET}$ (with Oligonucleotides after 10 min) |
|---------|----------------------------------|------------------------------------------------|-------------------------------------------------|
| With A6 | 0.70 ± 0.04                      | 0.61 ± 0.016                                   | 0.58 ± 0.025                                    |
| With G6 | 0.70 ± 0.04                      | 0.65 ± 0.019                                   | 0.63 ± 0.024                                    |
| With A9 | 0.70 ± 0.04                      | 0.64 ± 0.02                                    | 0.51 ± 0.01                                     |
| With G9 | 0.70 ± 0.04                      | 0.65 ± 0.025                                   | 0.63 ± 0.032                                    |

## Fluorescence Anisotropy

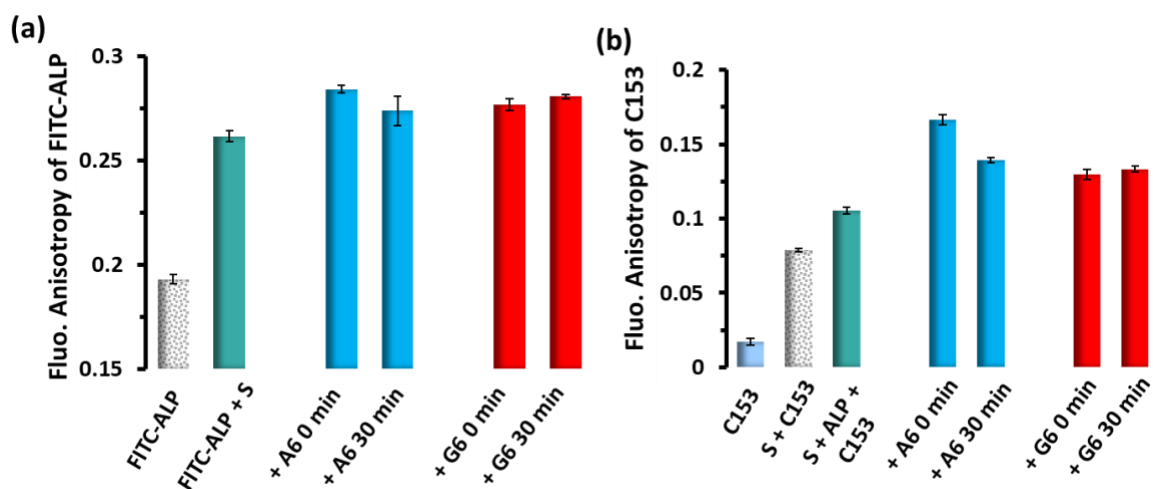

**Fig. S61.** Representative bar plot to show the Fluorescence Anisotropy values of (a) FITC-ALP (b) C153 with time after addition of A6 and G6 oligos. Experimental conditions: [FITC-ALP] = 100 nM, [C153] = 1  $\mu$ M, [C<sub>16</sub>DPA•Zn<sup>2+</sup>] = 50  $\mu$ M, [oligonucleotides] = 5  $\mu$ M, slit width ex/em = 5/5 nm, Excitation wavelength = 492nm (for FITC-ALP), 430nm (for C153), [HEPES] = 5 mM, pH 7.0, T = 25 °C.

## Fluorescence Lifetime

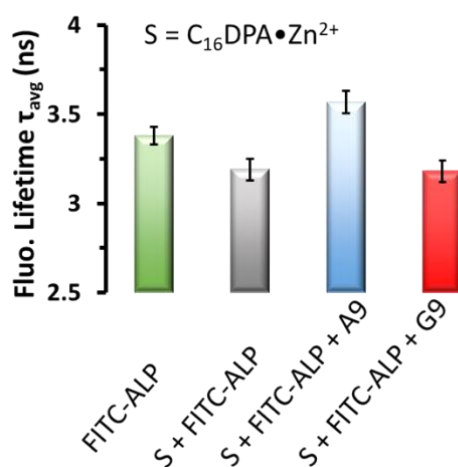

**Fig. S62.** Representative bar plot to show Fluorescence Lifetime of Oligos with FITC tagged ALP in the presence of surfactant. Experimental conditions: [FITC-ALP] = 100 nM, [C<sub>16</sub>DPA•Zn<sup>2+</sup>] = 50  $\mu$ M, [oligonucleotides] = 5  $\mu$ M, Excitation wavelength = 480nm, [HEPES] = 5 mM, pH 7.0, T = 25 °C.

**Table. S8** Fluorescence Lifetime data of FITC-ALP with C<sub>16</sub>DPA•Zn<sup>2+</sup> in the presence of oligonucleotides

Experimental conditions: [ALP-FITC] = 100 nM, [ C<sub>16</sub>DPA•Zn<sup>2+</sup> ] = 50 μM, [oligonucleotides] = 5 μM, [HEPES] = 5 mM, pH 7.0, T = 25 °C.

|                                                                      | $\tau_1$<br>(ns) | $\tau_2$<br>(ns) | $\tau_3$<br>(ns) | $\alpha_1$ | $\alpha_2$ | $\alpha_3$ | $\tau_{avg}$ (ns) | $\chi^2$ |
|----------------------------------------------------------------------|------------------|------------------|------------------|------------|------------|------------|-------------------|----------|
| ALP-FITC                                                             | 1.63             | 3.81             | 0.352            | 15.24      | 82.18      | 2.58       | 3.38 ± 0.05       | 1.02     |
| C <sub>16</sub> DPA•Zn <sup>2+</sup> + ALP-FITC                      | 1.49             | 3.83             | 0.276            | 23.09      | 74.18      | 2.73       | 3.19 ± 0.06       | 1.14     |
| ALP-FITC + A9                                                        | 1.61             | 3.92             | 0.245            | 12.19      | 85.37      | 2.45       | 3.54 ± 0.048      | 1.12     |
| C <sub>16</sub> DPA•Zn <sup>2+</sup> + ALP-FITC + A9<br>initial      | 1.53             | 3.95             | 0.140            | 13.97      | 84.83      | 1.20       | 3.57 ± 0.063      | 0.986    |
| C <sub>16</sub> DPA•Zn <sup>2+</sup> + ALP-FITC + A9<br>after 2 min  | 1.63             | 3.87             | 0.077            | 16.04      | 82.83      | 1.62       | 3.47 ± 0.05       | 1.17     |
| C <sub>16</sub> DPA•Zn <sup>2+</sup> + ALP-FITC + A9<br>after 10 min | 1.35             | 3.68             | 0.142            | 14.73      | 83.50      | 1.77       | 3.27 ± 0.045      | 1.08     |
| C <sub>16</sub> DPA•Zn <sup>2+</sup> + ALP-FITC + A9<br>after 12 min | 1.55             | 3.81             | 0.232            | 17.97      | 80.14      | 1.88       | 3.34 ± 0.06       | 1.15     |

**Table. S9** Fluorescence Lifetime data of FITC-ALP with C<sub>16</sub>DPA•Zn<sup>2+</sup> in the presence of oligonucleotides

Experimental conditions: [ALP-FITC] = 100 nM, [ C<sub>16</sub>DPA•Zn<sup>2+</sup> ] = 50 μM, [oligonucleotides] = 5 μM, [HEPES] = 5 mM, pH 7.0, T = 25 °C.

|                                                                      | $\tau_1$<br>(ns) | $\tau_2$<br>(ns) | $\tau_3$ (ns) | $\alpha_1$ | $\alpha_2$ | $\alpha_3$ | $\tau_{avg}$ (ns) | $\chi^2$ |
|----------------------------------------------------------------------|------------------|------------------|---------------|------------|------------|------------|-------------------|----------|
| ALP-FITC                                                             | 1.63             | 3.81             | 0.352         | 15.24      | 82.18      | 2.58       | 3.38 ± 0.05       | 1.02     |
| C <sub>16</sub> DPA•Zn <sup>2+</sup> + ALP-FITC                      | 1.49             | 3.83             | 0.276         | 23.09      | 74.18      | 2.73       | 3.19 ± 0.06       | 1.14     |
| ALP-FITC + G9                                                        | 1.65             | 4.03             | 0.273         | 20.56      | 76.86      | 2.58       | 3.44 ± 0.048      | 1.03     |
| C <sub>16</sub> DPA•Zn <sup>2+</sup> + ALP-FITC + G9<br>initial      | 1.26             | 3.68             | 0.137         | 16.40      | 80.66      | 2.95       | 3.18 ± 0.06       | 1.15     |
| C <sub>16</sub> DPA•Zn <sup>2+</sup> + ALP-FITC + G9<br>after 2 min  | 1.39             | 3.7              | 0.196         | 17.78      | 79.22      | 2.99       | 3.18 ± 0.03       | 1.13     |
| C <sub>16</sub> DPA•Zn <sup>2+</sup> + ALP-FITC + G9<br>after 10 min | 1.14             | 3.59             | 0.085         | 14.75      | 82.28      | 2.97       | 3.12 ± 0.057      | 1.09     |
| C <sub>16</sub> DPA•Zn <sup>2+</sup> + ALP-FITC + G9<br>after 12 min | 1.19             | 3.61             | 0.086         | 15.52      | 81.38      | 3.11       | 3.12 ± 0.049      | 1.24     |

## DLS Study

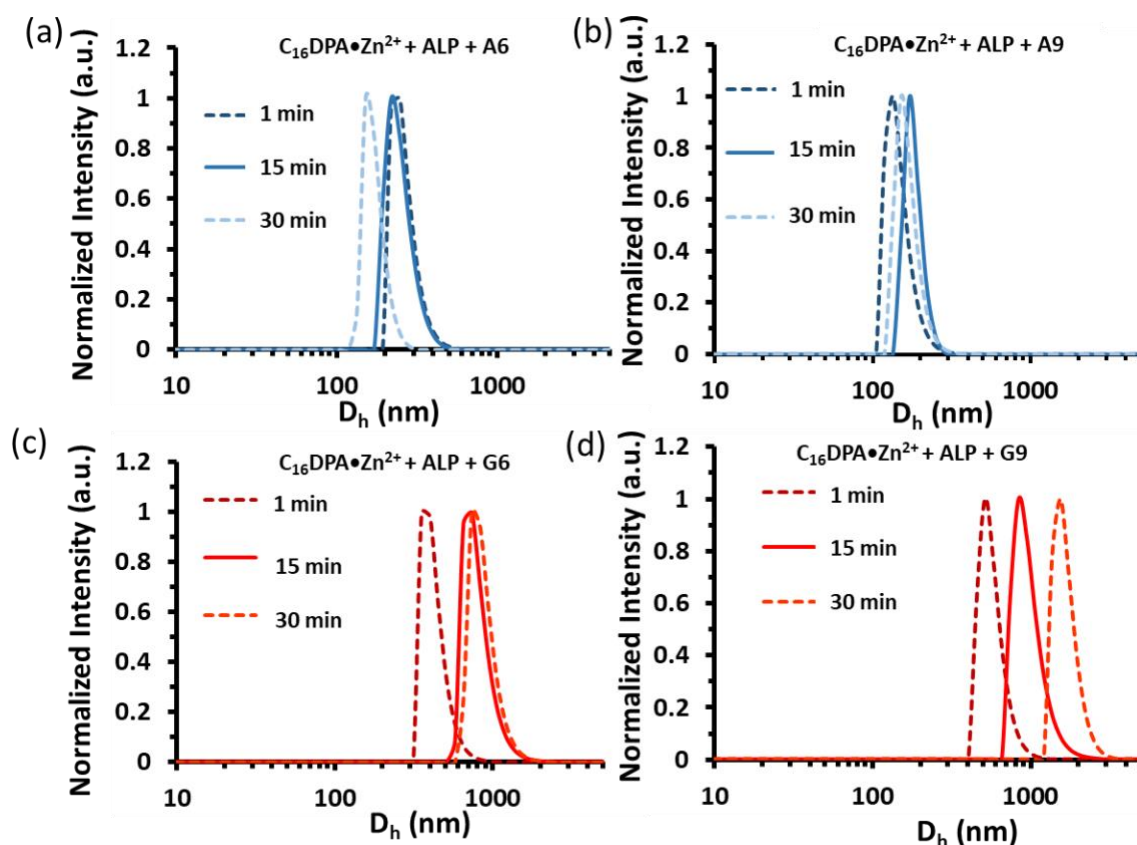

**Fig. S63.** DLS plot shows  $D_h$  (hydrodynamic diameter) of (a)  $C_{16}DPA \bullet Zn^{2+} + ALP + A6$  (b)  $C_{16}DPA \bullet Zn^{2+} + ALP + A9$  (c)  $C_{16}DPA \bullet Zn^{2+} + ALP + G6$  (d)  $C_{16}DPA \bullet Zn^{2+} + ALP + G9$  with time up to 30min. Experimental conditions:  $[ALP] = 100 \text{ nM}$ ,  $[C_{16}DPA \bullet Zn^{2+}] = 50 \text{ }\mu\text{M}$ ,  $[\text{oligonucleotides}] = 5 \text{ }\mu\text{M}$ ,  $[\text{HEPES}] = 5 \text{ mM}$ ,  $\text{pH } 7.0$ ,  $T = 25 \text{ }^\circ\text{C}$ .

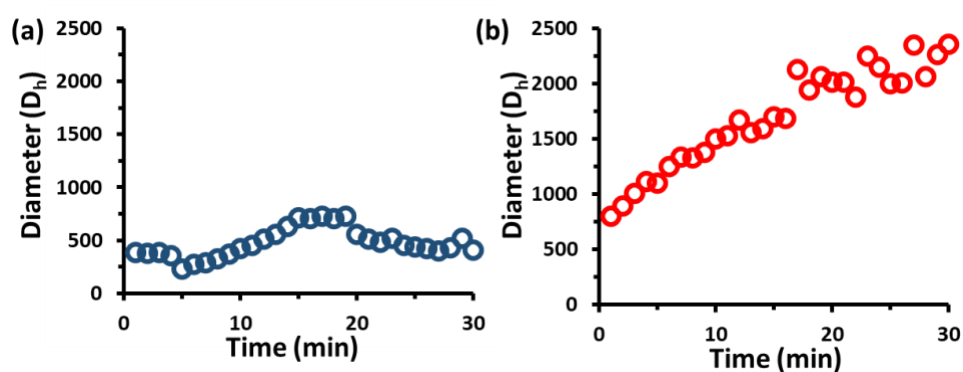

**Fig. S64.** DLS plot shows  $D_h$  (hydrodynamic diameter) of (a)  $C_{16}DPA \bullet Zn^{2+} + ALP + A9$  (b)  $C_{16}DPA \bullet Zn^{2+} + ALP + G9$  with time up to 30min. Experimental conditions:  $[ALP] = 100 \text{ nM}$ ,  $[C_{16}DPA \bullet Zn^{2+}] = 50 \text{ }\mu\text{M}$ ,  $[\text{oligonucleotides}] = 5 \text{ }\mu\text{M}$ ,  $[\text{HEPES}] = 5 \text{ mM}$ ,  $\text{pH } 7.0$ ,  $T = 25 \text{ }^\circ\text{C}$ .

For, A6 and A9, size of the complex initially increased and then decreased. For G6 and G9, with time it did not decrease rather increased or increased size remained constant.

## CD Spectra of Oligo

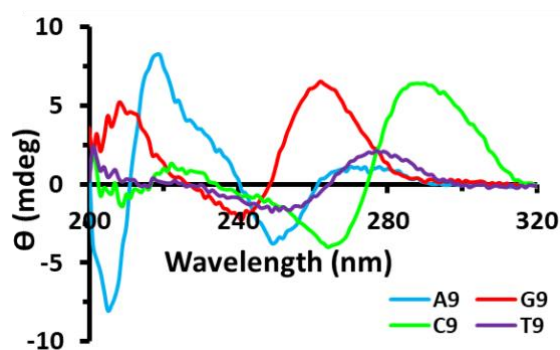

**Fig. S65.** Circular Dichroism (CD) spectra of Oligos A9, G9, C9 and T9 in absence of  $C_{16}DPAZn^{2+}$ . Experimental conditions: [oligonucleotides] = 10  $\mu$ M, cuvette pathlength = 2mm [HEPES] = 5 mM, pH 7.0, T = 25  $^{\circ}$ C.

## Melting Temperature of Oligos

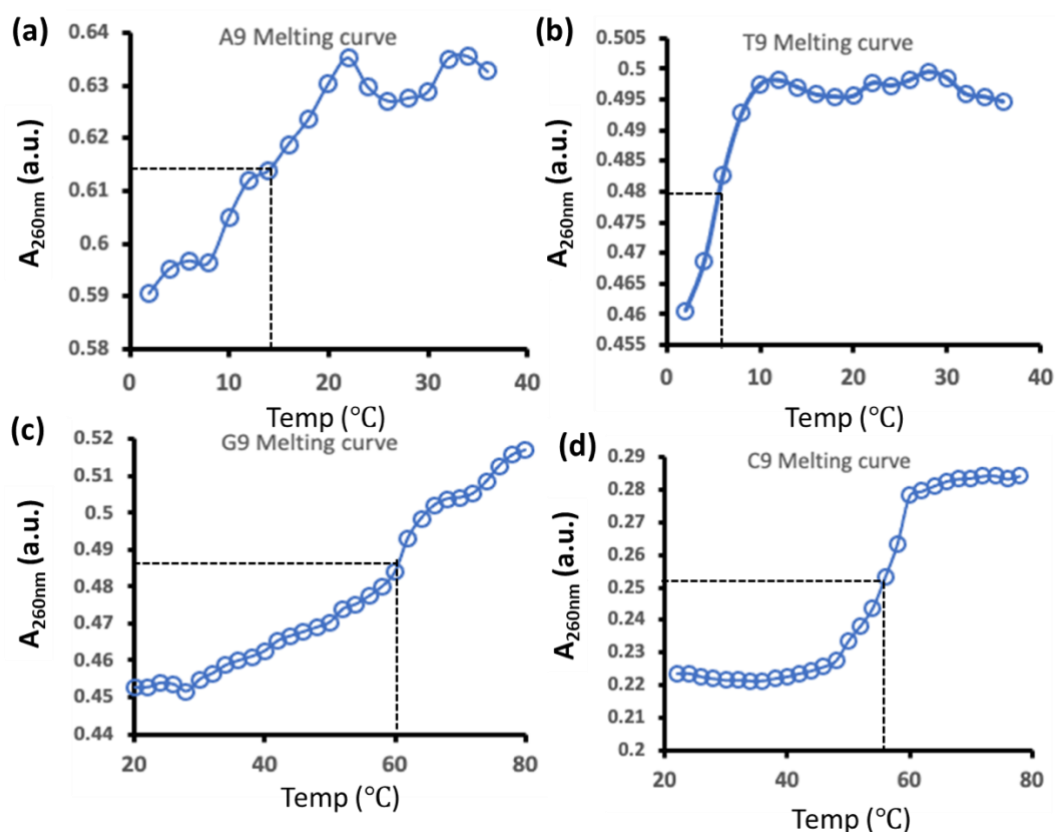

**Fig. S66.** Absorbance plots of Oligos (a) A9 (b) T9 at 260 nm as a function of temperature from 0-40 $^{\circ}$ C (c) G9 and (d) C9 as a function of temperature from 20-80 $^{\circ}$ C. Experimental conditions: [oligonucleotides] = 5  $\mu$ M, [HEPES] = 5 mM, pH 7.0, T = 25  $^{\circ}$ C. From Fig. S66, experimentally found  $T_m^{\circ}$  of A9, T9, G9 and C9 were 14 v, 6  $^{\circ}$ C, 60  $^{\circ}$ C, and 54  $^{\circ}$ C respectively.

## Catalysis of Fluorophore-tagged oligonucleotides

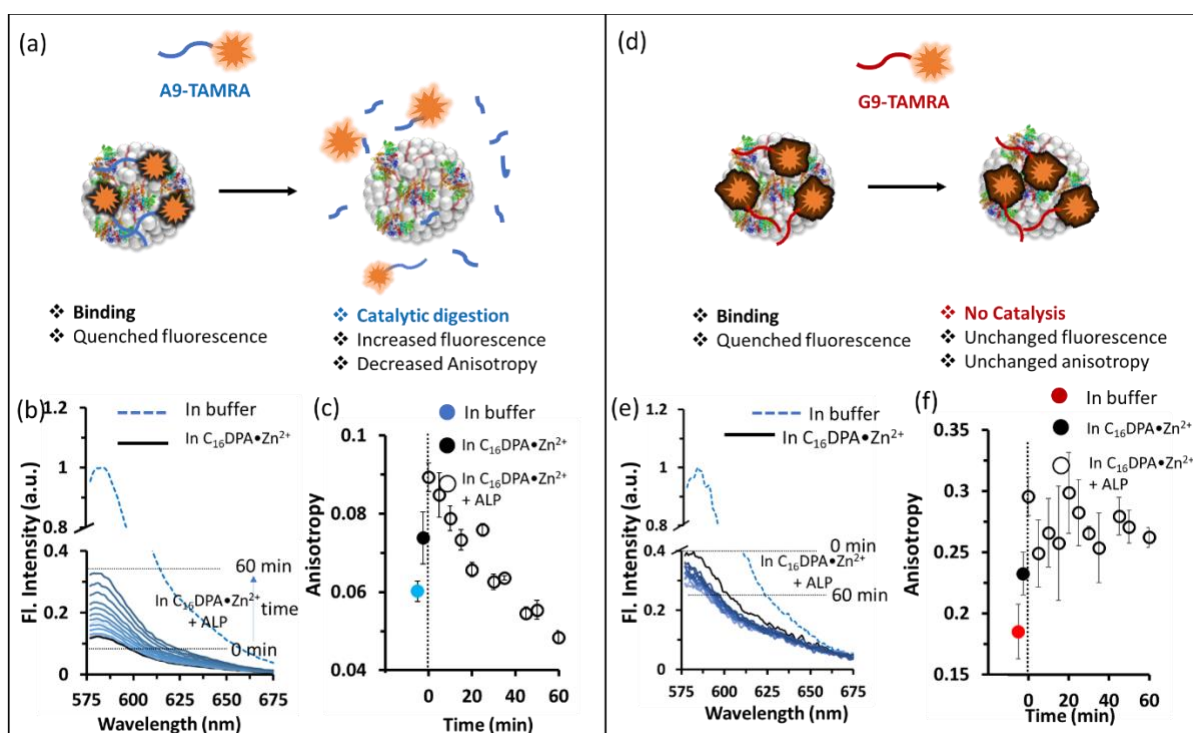

**Fig. S67.** (a) Schematic of A9-TAMRA digestion by the  $C_{16}DPA \cdot Zn^{2+}$ -ALP complex, showing time-dependent change (b) in fluorescence emission spectra and (c) anisotropy value. (d) Schematic of G9-TAMRA digestion by the  $C_{16}DPA \cdot Zn^{2+}$ -ALP complex, showing time-dependent change (e) in fluorescence emission spectra and (f) anisotropy value. Experimental conditions: [ALP] = 100 nM,  $[C_{16}DPA \cdot Zn^{2+}]$  = 50  $\mu$ M, [oligonucleotides] = 5  $\mu$ M, ex/em slit width 5/5 nm, Excitation wavelength = 555 nm, [HEPES] = 5 mM, pH 7.0, T = 25  $^{\circ}$ C.

## 10. Binding and Catalysis Studies through ITC (Isothermal Titration Calorimetry)

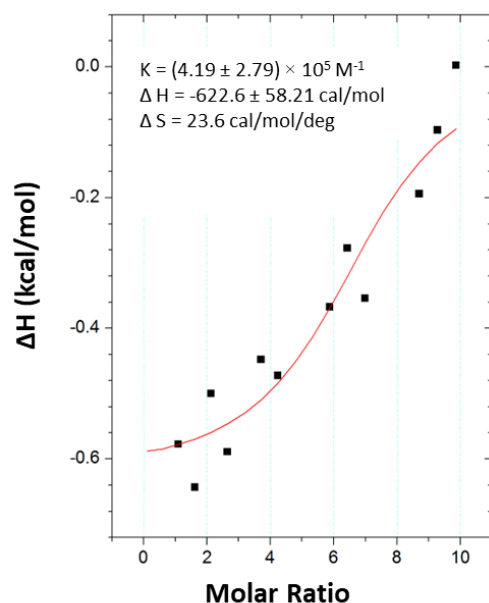

**Fig. S68.** Isothermal Titration Calorimetry (ITC) isotherm of (a)  $C_{16}DPA \bullet Zn^{2+}$  (in the cell) with ALP (in syringe). Experimental conditions:  $[C_{16}DPA \bullet Zn^{2+}] = 300 \mu M$ ,  $[ALP] = 3 \mu M$ ,  $[HEPES] = 5 \text{ mM}$ ,  $\text{pH } 7.0$ ,  $T = 25 \text{ }^\circ\text{C}$ .

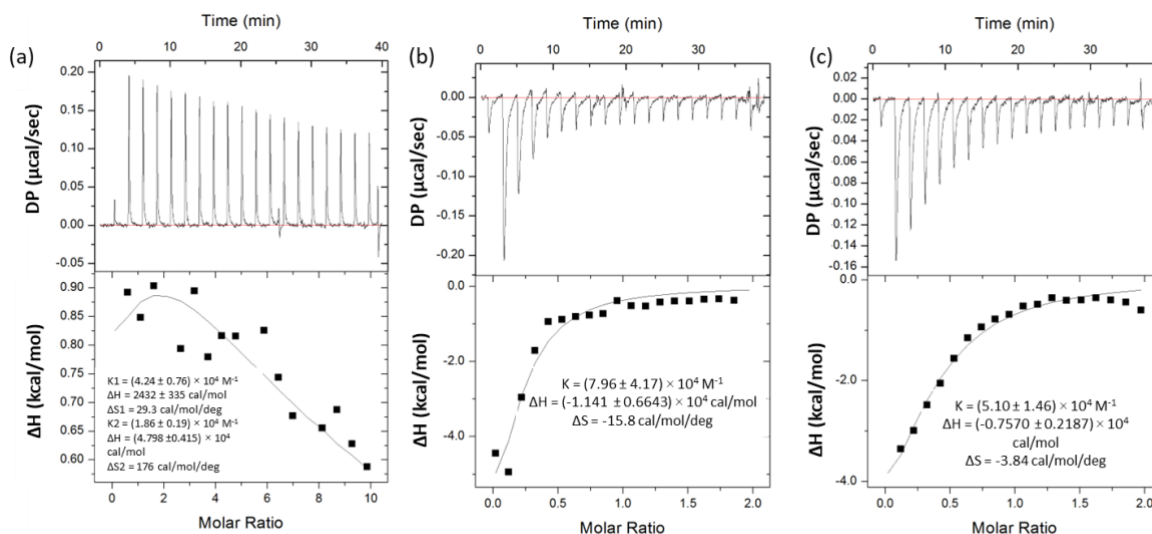

**Fig. S69.** Isothermal Titration Calorimetry (ITC) isotherm of (a)  $ALP + Zn(NO_3)_2$  (in the cell) with  $Na_3PO_4$  (in syringe), fitted in sequential binding fit model<sup>S3-S4</sup> and (b)  $C_{16}DPA \bullet Zn^{2+}$  (in the cell) with  $Na_2HPO_4$  (in syringe) (c)  $C_{16}DPA \bullet Zn^{2+} + ALP$  (in the cell) with  $Na_2HPO_4$  (in syringe). Experimental conditions:  $[C_{16}DPA \bullet Zn^{2+}] = 60 \mu M$ ,  $[Zn(NO_3)_2] = 60 \mu M$ ,  $[Na_3PO_4] = 600 \mu M$  (for fig. a)  $[Na_2HPO_4] = 600 \mu M$  (for fig. b and c),  $[ALP] = 12 \mu M$  (for fig. a),  $120 \text{ nM}$  (for fig. c),  $[HEPES] = 5 \text{ mM}$ ,  $\text{pH } 7.0$ ,  $T = 25 \text{ }^\circ\text{C}$ .



**Table. S10** Thermodynamic aspects of phosphate binding with ALP, C<sub>16</sub>DPA•Zn<sup>2+</sup>, and C<sub>16</sub>DPA•Zn<sup>2+</sup>-ALP conjugate.

| System                                                                        | K (M <sup>-1</sup> )                                                         | ΔH (cal/mol)                                                | ΔS(cal/mol/deg)         |
|-------------------------------------------------------------------------------|------------------------------------------------------------------------------|-------------------------------------------------------------|-------------------------|
| ALP-Zn <sup>2+</sup> + Na <sub>3</sub> PO <sub>4</sub>                        | K1 = (4.24 ± 0.76) × 10 <sup>4</sup><br>K2 = (1.86 ± 0.19) × 10 <sup>4</sup> | ΔH1 = 2432 ± 335<br>ΔH2 = (4.798 ± 0.415) × 10 <sup>4</sup> | ΔS1 = 29.3<br>ΔS2 = 176 |
| C <sub>16</sub> DPA•Zn <sup>2+</sup> + Na <sub>2</sub> HPO <sub>4</sub>       | (7.96 ± 4.17) × 10 <sup>4</sup>                                              | (-1.14 ± 0.6643) × 10 <sup>4</sup>                          | -15.8                   |
| C <sub>16</sub> DPA•Zn <sup>2+</sup> - ALP + Na <sub>2</sub> HPO <sub>4</sub> | (5.10 ± 1.46) × 10 <sup>4</sup>                                              | (-0.7570 ± 0.2187) × 10 <sup>4</sup>                        | -3.84                   |

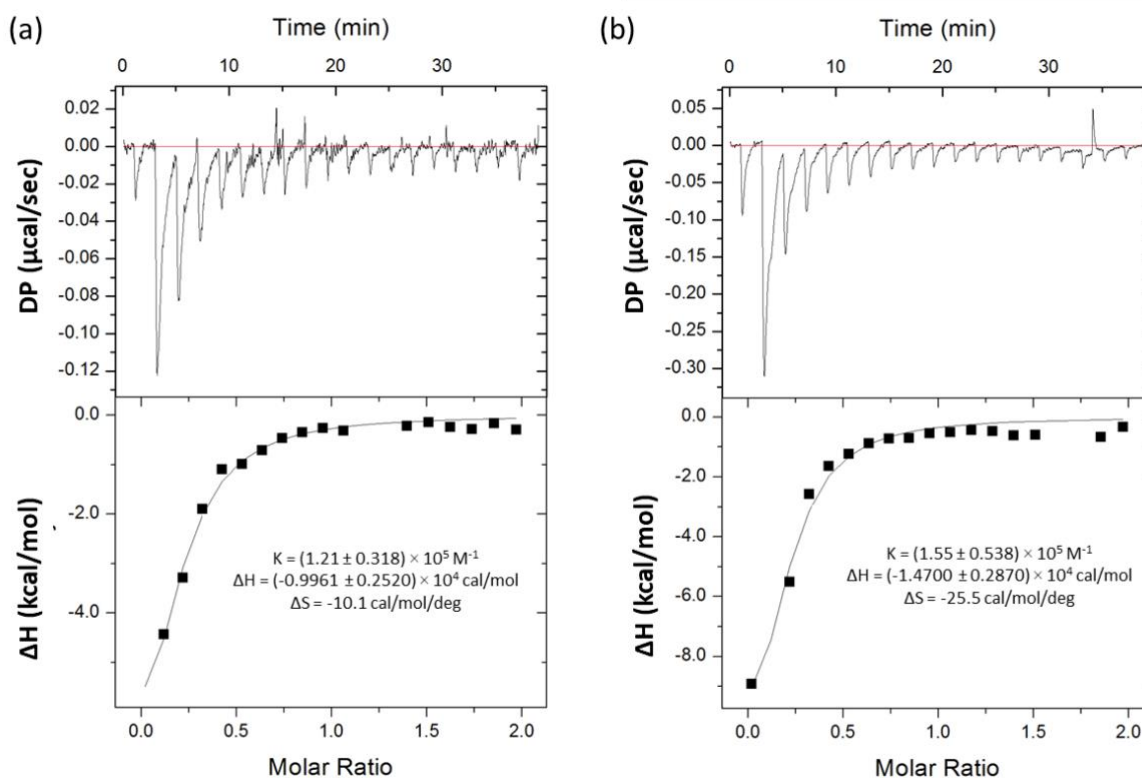

**Fig. S70.** Isothermal Titration Calorimetry (ITC) isotherm of (a) C<sub>16</sub>DPA•Zn<sup>2+</sup> (in the cell) with AMP (in syringe), and (b) C<sub>16</sub>DPA•Zn<sup>2+</sup> (in the cell) with GMP (in syringe). Experimental conditions: [C<sub>16</sub>DPA•Zn<sup>2+</sup>] = 60 μM, [Nucleotides] = 600 μM, [HEPES] = 5 mM, pH 7.0, T = 25 °C.

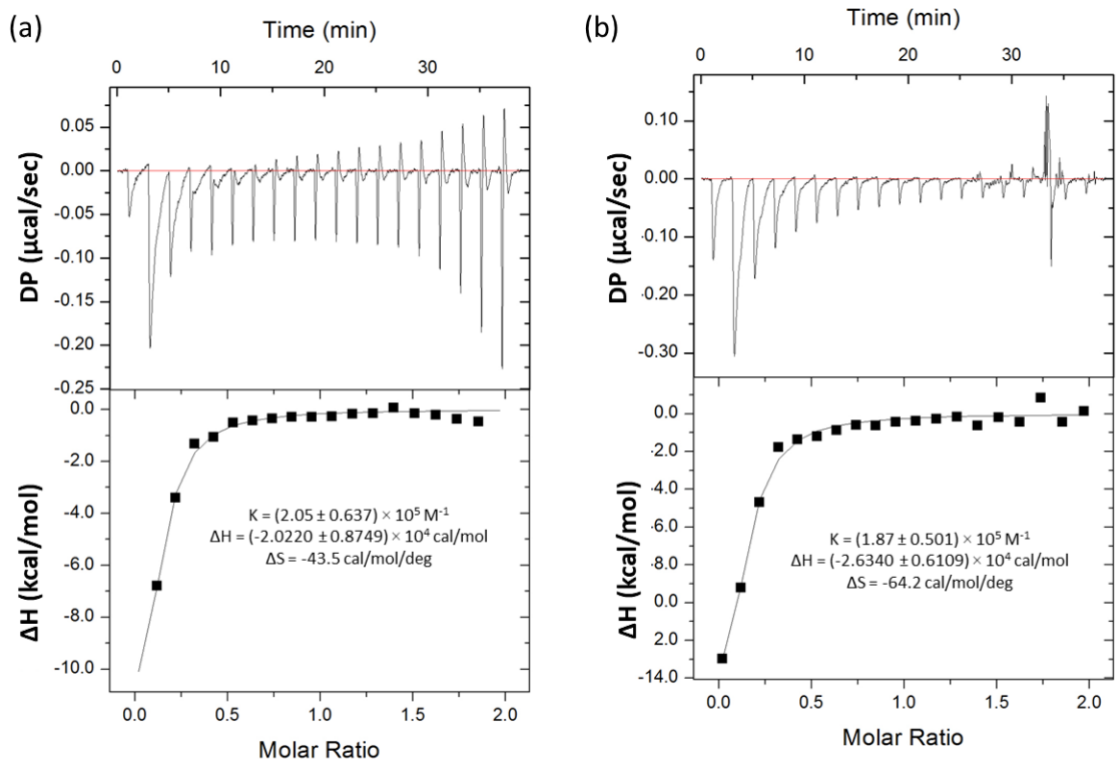

**Fig. S71.** Isothermal Titration Calorimetry (ITC) isotherm of (a)  $C_{16}DPA \bullet Zn^{2+}$  ALP (in the cell) with AMP (in syringe), and (b)  $C_{16}DPA \bullet Zn^{2+}$  ALP (in the cell) with GMP (in syringe). Experimental conditions:  $[C_{16}DPA \bullet Zn^{2+}] = 60 \mu M$ ,  $[ALP] = 120 \text{ nM}$ ,  $[Nucleotides] = 600 \mu M$ ,  $[HEPES] = 5 \text{ mM}$ ,  $\text{pH } 7.0$ ,  $T = 25 \text{ }^\circ\text{C}$ .

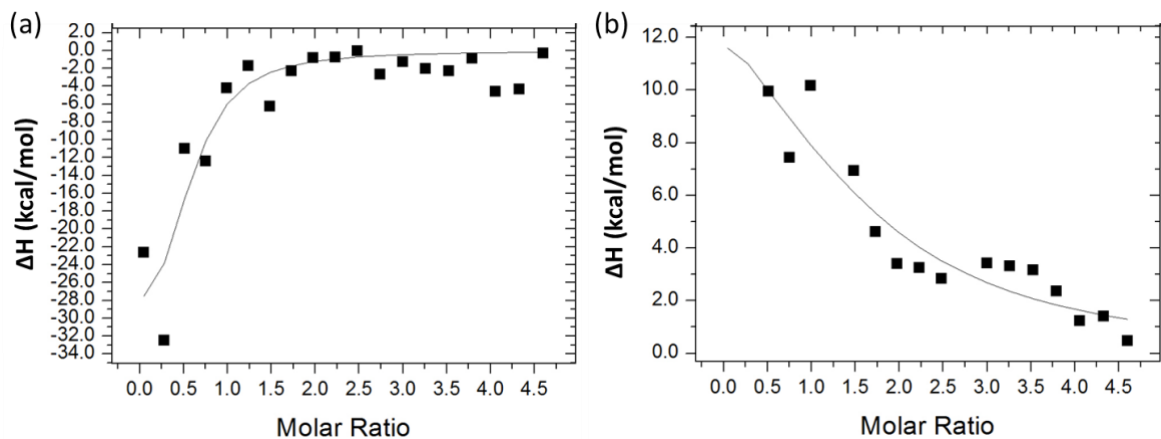

**Fig. S72.** Isothermal Titration Calorimetry (ITC) isotherm of (a) ALP (in the cell) with A9 (in syringe), and (b) ALP (in the cell) with G9 (in syringe). Experimental conditions:  $[ALP] = 1.2 \mu M$ ,  $[Nucleotides] = 28 \mu M$ ,  $[HEPES] = 5 \text{ mM}$ ,  $\text{pH } 7.0$ ,  $T = 25 \text{ }^\circ\text{C}$ .

**Table. S11** Thermodynamic aspects of ALP binding with A9 and G9.

|                 | N             | K (M <sup>-1</sup> )            | ΔH (cal/mol)                      | ΔS(cal/mol/deg) |
|-----------------|---------------|---------------------------------|-----------------------------------|-----------------|
| <b>ALP + A9</b> | 0.502 ± 0.155 | (4.85 ± 3.76) × 10 <sup>6</sup> | (- 3.76 ± 1.43) × 10 <sup>4</sup> | -95.8           |
| <b>ALP + G9</b> | 1.45 ± 0.761  | (8.25 ± 6.94) × 10 <sup>5</sup> | (1.98 ± 1.36) × 10 <sup>4</sup>   | 93.6            |

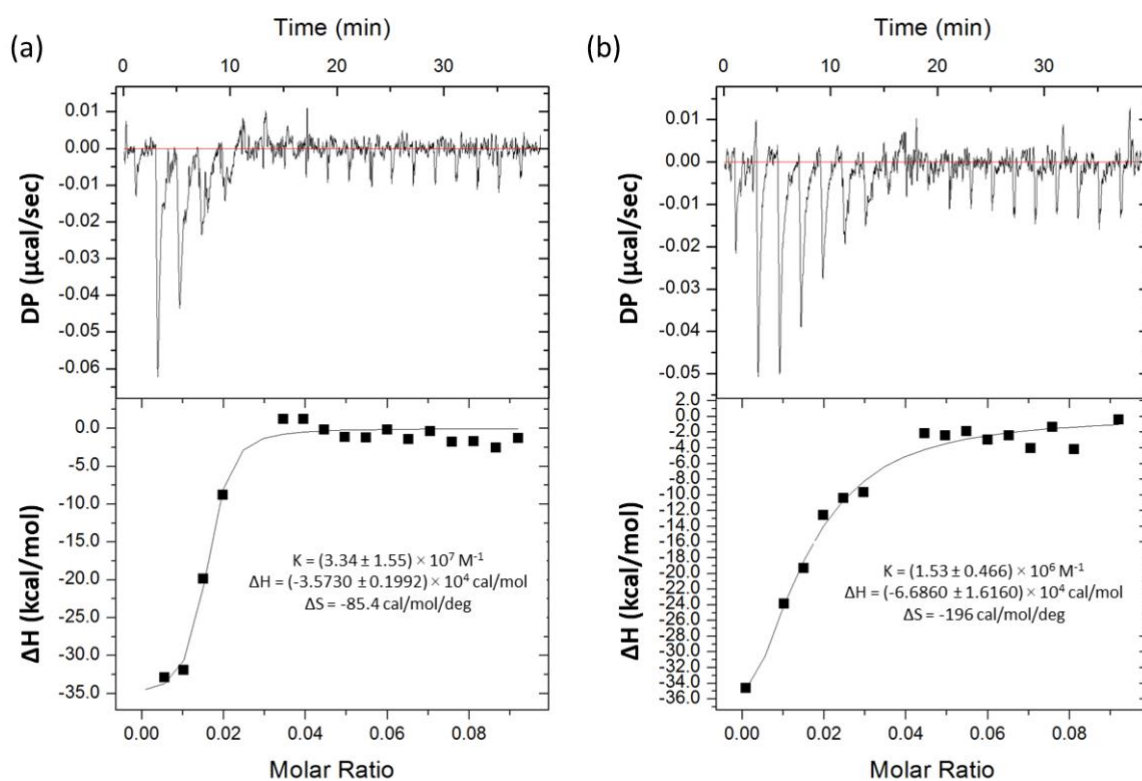

**Fig. S73.** Isothermal Titration Calorimetry (ITC) isotherm of (a) C<sub>16</sub>DPA•Zn<sup>2+</sup> (in the cell) with A9 (in syringe), and (b) C<sub>16</sub>DPA•Zn<sup>2+</sup> (in the cell) with G9 (in syringe). Experimental conditions: [C<sub>16</sub>DPA•Zn<sup>2+</sup>] = 60 μM, [oligonucleotides] = 28 μM, [HEPES] = 5 mM, pH 7.0, T = 25 °C.

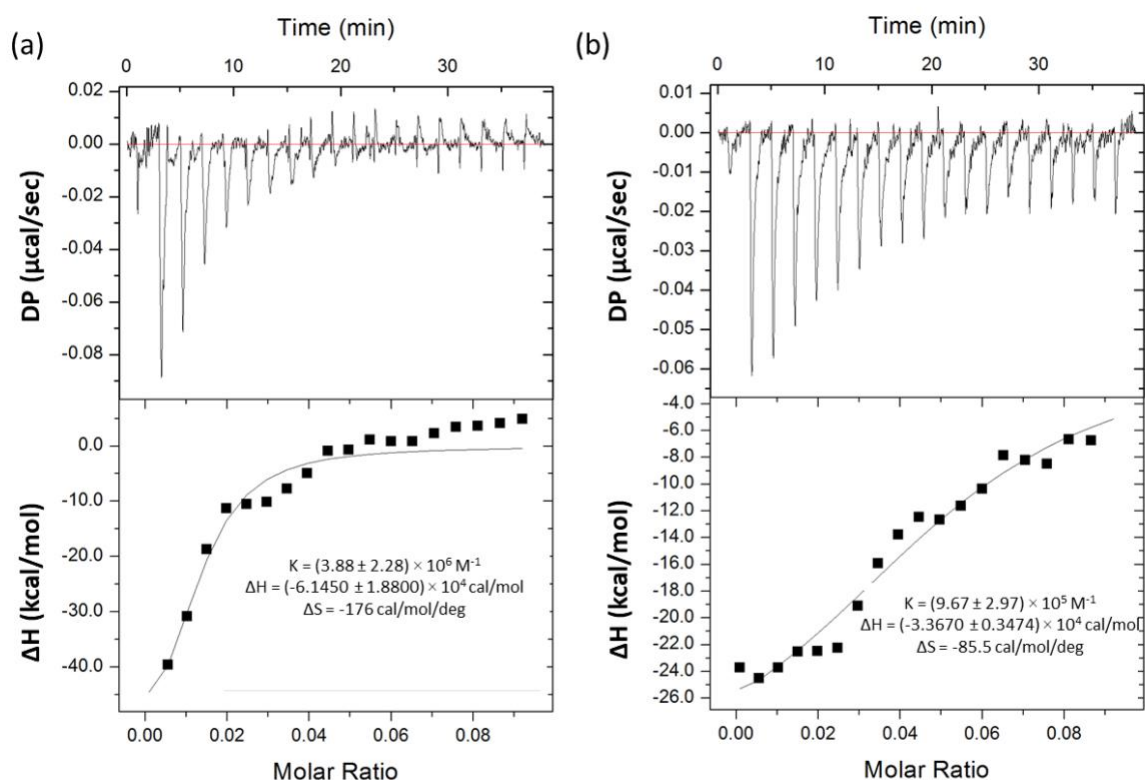

**Fig. S74.** Isothermal Titration Calorimetry (ITC) isotherm of (a)  $C_{16}DPA \bullet Zn^{2+}$  ALP (in the cell) with A9 (in syringe), and (b)  $C_{16}DPA \bullet Zn^{2+}$  ALP (in the cell) with G9 (in syringe). Experimental conditions:  $[C_{16}DPA \bullet Zn^{2+}] = 60 \mu M$ ,  $[ALP] = 120 nM$ ,  $[Oligonucleotides] = 28 \mu M$ ,  $[HEPES] = 5 mM$ ,  $pH 7.0$ ,  $T = 25 ^\circ C$ .

## 11. References

- S1 Micsonai, F. Wien, É. Bulyáki, J. Kun, É. Moussong, Y.-H. Lee, Y. Goto, M. Réfrégiers, J. Kardos, *Nucleic Acids Res.* **2018**, *46*, W315–W322.
- S2. Priyanka, S. Kaur Brar, S. Maiti, *ChemNanoMat* **2022**, *8*, e202100498.
- S3. M. L. Applebury, B. P. Johnson and J. E. Coleman, *J. Biol. Chem.*, 1970, **245**, 4968–4975.
- S4. D. R. Banerjee, D. Dutta, B. Saha, S. Bhattacharyya, K. Senapati, A. K. Das and A. Basak, *Org. Biomol. Chem.*, 2014, **12**, 73–85.
